# Supplementary material for: Risk factors for inadequate antibody response to primary rabies vaccination in dogs under one year of age
Source: PLoS Negl Trop Dis. 2017 Jul 31;11(7):e0005761. doi: 10.1371/journal.pntd.0005761 (PMC5552338; doi:10.1371/journal.pntd.0005761)
Supplement: S1 Dataset — Case number, name, breed abbreviation (breed1), breed (breed2), unique ID, Blood draw date (DRAWdate), gender (M = male, F = female), id, date of birth (DOB), rabies vaccination date (vax1date), dog size, FAN result in IU/mL) (TITER), PASS/FAIL (1 = Pass, ≥0.5 IU/mL; 0 = Fail, <0.5 IU/mL), consecutive number order of the sample in the dataset (#order original). (XLSX) [file pntd.0005761.s001.xlsx]

## Sheet: Data
casenumber	name	breed	breed2	unique ID	DRAWdate	gender	id	DOB	vax1date	dog_size	TITER	PASS/FAIL	# order original
224	TULU	CSH	Chihuahua	TULUCSH38365	2006-01-02	F	43865	2005-01-13	2005-06-28	Toy	3.45	1	1
630	CHANDLER			CHANDLER38367	2006-01-10	M	11116	2005-01-15	2005-11-22	.	4.98	1	2
829	MURPHY	WET	Wheaten Terrier	MURPHYWET38367	2006-01-13	M	26278	2005-01-15	2005-12-14	Medium	0.87	1	3
164	ELIZA DOOLITTLE	PUG	Pug	ELIZA DOOLITTLEPUG38369	2005-12-16	F	15199	2005-01-17	2005-06-24	Small	0.87	1	4
643	LUIGI	MIS	Miniature Schnauzer	LUIGIMIS38370	2006-01-07	M	65767	2005-01-18	2005-04-30	Small	2.62	1	5
812	BARON	LAB	Labrador Retriever	BARONLAB38375	2006-01-12	M	15828	2005-01-23	2005-08-02	Large	0.87	1	6
26	COFFEE			COFFEE38382	2005-12-30	M	11114	2005-01-30	2005-08-31	.	4.14	1	7
2510	SOMBRA	LAB	Labrador Retriever	SOMBRALAB38384	2005-12-12	F	11411	2005-02-01	2005-05-31	Large	1.15	1	8
1363	BECKHAM	MIX	Mix	BECKHAMMIX38384	2006-01-23	M	41903	2005-02-01	2005-06-17	.	1.15	1	9
1146	HALEY	SIB	Siberian Husky	HALEYSIB38385	2006-01-17	F	23510	2005-02-02	2005-06-15	Medium	2.76	1	10
2160	MIHI	MLT	Maltese	MIHIMLT38386	2006-01-13	M	1323	2005-02-03	2005-09-08	Toy	3.45	1	11
1855	DOC	PUG	Pug	DOCPUG38386	2006-01-31	M	14926	2005-02-03	2005-09-30	Small	1.15	1	12
670	HANK	BLD	Blood Hound	HANKBLD38392	2006-01-09	M	12467	2005-02-09	2005-07-16	giant	0.38	0	13
283	PINOT	YRK	Yorkshire Terrier	PINOTYRK38392	2006-01-04	M	25733	2005-02-09	2005-06-05	Toy	0.38	0	14
396	ROGUE	KCS	King Charles Spaniel	ROGUEKCS38392	2006-01-06	M	40573	2005-02-09	2005-06-09	Toy	0.17	0	15
1631	FEMALE AKITA	AKI	Akita	FEMALE AKITAAKI38393	2006-01-25	F	23212	2005-02-10	2006-01-04	giant	2.62	1	16
2655	BRUTUS	DOB	Doberman Pinscher	BRUTUSDOB38393	2006-02-08	M	66711	2005-02-10	2005-06-13	Large	3.46	1	17
52	ZEUS	MIX	Mix	ZEUSMIX38398	2005-12-30	M	11800	2005-02-15	2005-05-13	.	2.62	1	18
2516	SHADOW	LAB	Labrador Retriever	SHADOWLAB38398	2006-02-07	M	14440	2005-02-15	2005-06-16	Large	0.17	0	19
2508	PACO	MIX	Mix	PACOMIX38403	2005-12-12	M	11393	2005-02-20	2005-11-03	.	1.99	1	20
1027	ANGEL	MIX	Mix	ANGELMIX38405	2006-01-12	F	25481	2005-02-22	2005-06-29	.	0.22	0	21
2079	TITUS	MLT	Maltese	TITUSMLT38405	2006-02-03	M	43376	2005-02-22	2005-08-11	Toy	3.45	1	22
1074	BUBU	DSM	Dachshund	BUBUDSM38406	2006-01-16	M	23661	2005-02-23	2005-11-28	Small	4.98	1	23
3359	LEMONY	ITI	Italian Grey Hound	LEMONYITI38406	2006-02-21	M	43951	2005-02-23	2005-06-15	Toy	0.66	1	24
351	GINGER	SLK	Silky Terrier	GINGERSLK38410	2006-01-03	F	42406	2005-02-27	2005-10-27	Toy	1.99	1	25
3037	BULLY	YRK	Yorkshire Terrier	BULLYYRK38412	2006-02-15	M	10793	2005-03-01	2006-01-14	Toy	3.45	1	26
1443	LAYKA	MIN	Miniature Pinscher	LAYKAMIN38412	2006-01-23	F	40111	2005-03-01	2005-09-10	Toy	3.45	1	27
963		EBD	English Bulldog	EBD38414	2006-01-17	F	10969	2005-03-03	2005-12-06	Medium	4.98	1	28
1472	MOLLY	LAB	Labrador Retriever	MOLLYLAB38414	2006-01-24	F	39820	2005-03-03	2006-01-05	Large	3.45	1	29
1299	HOMER	PUG	Pug	HOMERPUG38414	2006-01-20	M	44761	2005-03-03	2005-07-30	Small	0.22	0	30
2529	LEONARDO	SPO	Standard Poodle	LEONARDOSPO38416	2006-02-08	M	40761	2005-03-05	2005-12-27	Large	1.15	1	31
906	SAM	BOR	Border Collie	SAMBOR38417	2006-01-16	M	26779	2005-03-06	2006-01-11	Medium	4.98	1	32
311	KIM	LAB	Labrador Retriever	KIMLAB38417	2006-01-03	F	85782	2005-03-06	2005-08-29	Large	0.87	1	33
2422	MILNER	CCR	Chinese Crested	MILNERCCR38418	2006-02-06	M	25493	2005-03-07	2005-08-30	Toy	1.15	1	34
857	ZOE	CSH	Chihuahua	ZOECSH38418	2006-01-13	F	41181	2005-03-07	2005-08-19	Toy	1.99	1	35
3033	JOSIE	BOR	Border Collie	JOSIEBOR38419	2006-02-15	F	44419	2005-03-08	2005-07-14	Medium	0.17	0	36
4220	MOKA	CSH	Chihuahua	MOKACSH38425	2006-03-03	M	32530	2005-03-14	2006-02-03	Toy	2.17	1	37
3588	HANA	STB	St. Bernard	HANASTB38426	2006-02-24	F	14691	2005-03-15	2005-06-20	giant	3.45	1	38
1123	LILY	COC	Cocker Spaniel	LILYCOC38426	2006-01-18	F	14817	2005-03-15	2005-12-19	Small	2.76	1	39
2041	COCO	COC	Cocker Spaniel	COCOCOC38426	2006-02-01	F	16878	2005-03-15	2005-07-29	Small	1.15	1	40
3508	ZEN			ZEN38426	2006-02-18	M	17403	2005-03-15	2006-01-28	.	3.45	1	41
1484	MIKUNI	PIT	Pitbull Terrier	MIKUNIPIT38426	2006-01-24	F	26038	2005-03-15	2006-01-19	Medium	3.45	1	42
1986	TWITSY	SPO	Standard Poodle	TWITSYSPO38426	2006-02-02	F	42653	2005-03-15	2006-01-12	Large	4.98	1	43
3887	BUDDY	MIX	Mix	BUDDYMIX38426	2006-03-01	M	45099	2005-03-15	2006-02-08	.	3.45	1	44
2872	ORVILLE	YRK	Yorkshire Terrier	ORVILLEYRK38426	2006-02-10	M	45207	2005-03-15	2006-01-07	Toy	2.17	1	45
2872	SPARKY	YRK	Yorkshire Terrier	SPARKYYRK38426	2006-02-10	M	45394	2005-03-15	2006-01-07	Toy	2.17	1	46
364	MAXWELL	MIX	Mix	MAXWELLMIX38426	2005-12-30	M	66603	2005-03-15	2005-06-27	.	4.14	1	47
4171	HAKU	SIB	Siberian Husky	HAKUSIB38426	2006-03-06	M	78976	2005-03-15	2006-02-03	Medium	4.98	1	48
2979	COCO	SHI	Shih-tzu	COCOSHI38427	2006-02-10	M	38706	2005-03-16	2005-09-12	Small	1.51	1	49
3174	DIXIE	ASI	Australian Shepard	DIXIEASI38428	2006-02-09	F	25506	2005-03-17	2005-07-18	Medium	4.14	1	50
2179	BEAR	ASI	Australian Shepard	BEARASI38433	2006-02-06	M	13763	2005-03-22	2005-12-20	Medium	4.98	1	51
1895	TILLY	SHT	Shetland Sheepdog	TILLYSHT38435	2006-02-01	F	42568	2005-03-24	2005-08-15	Small	0.38	0	52
4984	MURRAY	NOR	Norfolk Terrier	MURRAYNOR38436	2006-03-13	M	25767	2005-03-25	2005-07-13	Small	0.13	0	54
1332	MAX			MAX38436	2006-01-19	M	62951	2005-03-25	2005-08-10	.	1.51	1	55
3664	BIANCA	CSH	Chihuahua	BIANCACSH38437	2006-02-25	F	66774	2005-03-26	2005-10-25	Toy	2.62	1	56
5395	PLAYER	MAL	Alaskan Malamute	PLAYERMAL38438	2006-03-21	M	13755	2005-03-27	2006-02-22	Large	4.14	1	57
5666	HALI	SHT	Shetland Sheepdog	HALISHT38438	2006-03-24	F	24055	2005-03-27	2006-01-26	Small	1.15	1	58
3689	NANA	SILKY TERRIER	Silky Terrier	NANASILKY TERRIER38438	2006-02-22	F	26063	2005-03-27	2005-07-28	Toy	3.46	1	59
3392	COCO	POM	Pomeranian	COCOPOM38438	2006-02-21	M	42266	2005-03-27	2005-07-25	Toy	2.62	1	60
5341	COOPER	MIX	Mix	COOPERMIX38439	2006-03-21	M	41760	2005-03-28	2006-03-07	.	4.14	1	61
1229	BILLY	COC	Cocker Spaniel	BILLYCOC38441	2006-01-20	M	44092	2005-03-30	2005-08-06	Small	0.66	1	62
265	BUSIE	AFF	Affenpinscher	BUSIEAFF38441	2006-01-04	M	68942	2005-03-30	2005-07-15	Toy	1.15	1	63
3811	PRINCE	RAT	Rat Terrier	PRINCERAT38442	2006-02-27	M	45130	2005-03-31	2006-01-31	Small	4.98	1	64
5064	SKUNK	YRK	Yorkshire Terrier	SKUNKYRK38443	2006-03-14	M	8158	2005-04-01	2005-12-05	Toy	2.62	1	65
5302	AMIGO	HAV	Havanese	AMIGOHAV38443	2006-03-21	M	12338	2005-04-01	2006-03-07	Toy	4.14	1	66
4523	TOBY	ROT	Rottweiler	TOBYROT38443	2006-02-15	M	42590	2005-04-01	2006-01-12	giant	4.14	1	67
5953	SAMMY	BOX	Boxer	SAMMYBOX38443	2006-03-25	F	43335	2005-04-01	2005-08-25	Large	0.66	1	68
3577	SOPHIE	STO	Standard Poodle	SOPHIESTO38444	2006-02-24	F	44164	2005-04-02	2005-07-14	Large	1.51	1	69
3984	BANDIT	DSC	Dachshund	BANDITDSC38445	2006-03-02	M	42389	2005-04-03	2006-02-09	Small	3.45	1	70
4081	KAILOA	MIX	Mix	KAILOAMIX38445	2006-03-02	F	43300	2005-04-03	2005-08-10	.	3.45	1	71
4236	ABBY	CSH	Chihuahua	ABBYCSH38445	2006-03-01	F	43683	2005-04-03	2005-07-15	Toy	2.17	1	72
6417	BAILEY	MIX	Mix	BAILEYMIX38448	2006-03-31	F	11723	2005-04-06	2005-08-05	.	0	0	73
4963	LONDON	MAS	Mastiff	LONDONMAS38448	2006-03-14	F	16312	2005-04-06	2005-11-07	giant	1.15	1	74
239	BONZO	MIN	Miniature Pinscher	BONZOMIN38448	2006-01-03	M	27340	2005-04-06	2005-09-24	Toy	0.5	1	75
3023	CHE	MIN	Miniature Pinscher	CHEMIN38450	2006-02-15	M	43142	2005-04-08	2006-02-01	Toy	2.76	1	77
2034	MAGOO	PIT	Pitbull Terrier	MAGOOPIT38451	2006-02-01	M	42378	2005-04-09	2005-07-28	Medium	0.29	0	78
5312	PITCH	BOS	Boston Terrier	PITCHBOS38451	2006-03-20	F	44722	2005-04-09	2006-02-11	Small	4.14	1	79
6470	SHEETAL	LAB	Labrador Retriever	SHEETALLAB38451	2006-04-03	F	47856	2005-04-09	2005-08-03	Large	0.22	0	80
2893	SALLIE	GLD	Golden Retriever	SALLIEGLD38454	2006-02-13	F	25463	2005-04-12	2005-08-08	Large	2.17	1	81
2305	ARES	GLD	Golden Retriever	ARESGLD38454	2006-02-06	M	32948	2005-04-12	2006-01-12	Large	4.14	1	82
6366	SNOWY	JRT	Jack Russell Terrier	SNOWYJRT38455	2006-04-04	F	26757	2005-04-13	2006-03-13	Small	2.17	1	83
2193	BUSTER	ASI	Australian Shepard	BUSTERASI38456	2006-02-05	M	38357	2005-04-14	2005-08-02	Medium	0.29	0	84
5953	ROXY	BAS	Basset Hound	ROXYBAS38456	2006-03-25	F	43309	2005-04-14	2005-08-25	Small	0.87	1	86
3103	CORPORAL	LAB	Labrador Retriever	CORPORALLAB38456	2006-02-16	M	44930	2005-04-14	2006-02-08	Large	3.45	1	87
3103	STEVIE	LAB	Labrador Retriever	STEVIELAB38456	2006-02-16	F	45165	2005-04-14	2006-02-08	Large	3.45	1	88
6499	MARCO	CLH	Chihuahua	MARCOCLH38457	2006-04-03	M	10604	2005-04-15	2006-03-02	Toy	2.76	1	89
4674	DAISY	MAL	Alaskan Malamute	DAISYMAL38457	2006-03-08	F	22579	2005-04-15	2005-07-14	Large	4.14	1	90
1446	TIMMY	LAB	Labrador Retriever	TIMMYLAB38457	2006-01-25	M	25582	2005-04-15	2005-12-15	Large	3.45	1	91
3566	SAM	AUS	Australian Terrier	SAMAUS38457	2006-02-24	M	44121	2005-04-15	2006-01-20	Toy	3.45	1	92
4758	LOLA	CHI	Chihuahua	LOLACHI38457	2006-03-10	F	44152	2005-04-15	2006-02-17	Toy	3.45	1	93
4078	DUNCAN	LAB	Labrador Retriever	DUNCANLAB38458	2006-03-02	M	11302	2005-04-16	2006-02-16	Large	3.45	1	94
5394	PASHA	SBA	Shiba-inu	PASHASBA38458	2006-03-21	F	25545	2005-04-16	2006-02-25	Small	4.14	1	95
1003	CALEN	IRS	Irish Terrier	CALENIRS38459	2006-01-16	M	25883	2005-04-17	2005-09-20	Small	0.38	0	96
6701	BEAU	TPO	Toy Poodle	BEAUTPO38459	2006-04-04	M	36327	2005-04-17	2005-07-11	Toy	4.98	1	98
5376	JADE			JADE38459	2006-03-17	F	40433	2005-04-17	2006-01-04	.	4.14	1	99
5482	MEMORY	MIN	Miniature Pinscher	MEMORYMIN38459	2006-03-21	F	86326	2005-04-17	2005-09-08	Toy	1.99	1	100
943	COCO	EBD	English Bulldog	COCOEBD38460	2006-01-16	F	17253	2005-04-18	2005-11-07	Medium	4.98	1	101
1791	ZACKERY	CCR	Chinese Crested	ZACKERYCCR38462	2006-01-27	M	15489	2005-04-20	2005-11-21	Toy	1.51	1	102
1331	MONTY	PUG	Pug	MONTYPUG38462	2006-01-18	M	66754	2005-04-20	2005-08-24	Small	3.45	1	103
1548	BAILY	BEA	Beagle	BAILYBEA38463	2006-01-25	F	11735	2005-04-21	2005-08-17	Small	4.14	1	104
4282	CALI	MLT	Maltese	CALIMLT38463	2006-03-04	F	40736	2005-04-21	2006-02-14	Toy	2.17	1	105
3689	COLLON	RAT	Rat Terrier	COLLONRAT38464	2006-02-22	M	26033	2005-04-22	2005-12-19	Small	0.22	0	106
8065	EIN	DSC	Dachshund	EINDSC38465	2006-04-11	M	33639	2005-04-23	2006-03-02	Small	2.76	1	107
387	MARINA	GLD	Golden Retriever	MARINAGLD38465	2006-01-05	F	43593	2005-04-23	2005-08-02	Large	0.66	1	108
691	GREENLEE	PUG	Pug	GREENLEEPUG38466	2006-01-09	F	40891	2005-04-24	2005-09-09	Small	4.98	1	109
6865	BONNIE	MIX	Mix	BONNIEMIX38466	2006-04-12	F	45923	2005-04-24	2005-08-24	.	0.02	0	110
1370	CHAMPAN	LAB	Labrador Retriever	CHAMPANLAB38467	2006-01-23	F	110	2005-04-25	2006-01-09	Large	3.45	1	111
7153	ADIE	WES	West Highland Terrier	ADIEWES38467	2006-04-12	F	18567	2005-04-25	2005-08-11	Small	0.1	0	112
6231	FOXY	GLD	Golden Retriever	FOXYGLD38467	2006-04-03	F	41990	2005-04-25	2006-03-10	Large	4.14	1	113
1445	LILLY			LILLY38468	2006-01-18	F	24033	2005-04-26	2005-09-15	.	3.45	1	114
4191	SPONGE BOB	BUL	Bull Terrier	SPONGE BOBBUL38468	2006-03-03	M	42718	2005-04-26	2006-01-20	Large	0.5	1	115
3885	EXON	COC	Cocker Spaniel	EXONCOC38469	2006-02-25	M	11109	2005-04-27	2005-11-05	Small	0.66	1	116
6997	BLOSSOM	POM	Pomeranian	BLOSSOMPOM38469	2006-04-12	F	21741	2005-04-27	2006-03-22	Toy	2.76	1	117
4852	JACK	LAB	Labrador Retriever	JACKLAB38469	2006-03-03	M	25001	2005-04-27	2006-01-03	Large	0.38	0	118
4852	RUDY	LAB	Labrador Retriever	RUDYLAB38469	2006-03-03	M	29537	2005-04-27	2006-01-03	Large	1.51	1	119
5920	BABY PRECIOUS	LAB	Labrador Retriever	BABY PRECIOUSLAB38469	2006-03-29	F	33124	2005-04-27	2005-09-03	Large	0.22	0	120
1791	ABBY GIRL	CCR	Chinese Crested	ABBY GIRLCCR38470	2006-01-27	F	15643	2005-04-28	2005-12-18	Toy	1.51	1	121
7193	ANGEL	MIX	Mix	ANGELMIX38470	2006-04-17	F	31467	2005-04-28	2006-04-06	.	4.14	1	122
7739	AMBAR			AMBAR38470	2006-04-19	F	67452	2005-04-28	2005-09-26	.	1.38	1	123
1475	TALULAH	JRT	Jack Russell Terrier	TALULAHJRT38471	2006-01-24	F	25695	2005-04-29	2005-07-20	Small	3.45	1	124
2971	MONTANA	GER	German Shepard	MONTANAGER38471	2006-02-15	M	41884	2005-04-29	2005-08-26	Large	0.17	0	125
6950	TANA	MIX	Mix	TANAMIX38472	2006-04-12	F	14911	2005-04-30	2005-10-31	.	0.5	1	126
2791	AUGUSTUS	MAL	Alaskan Malamute	AUGUSTUSMAL38472	2006-02-13	M	25875	2005-04-30	2006-01-06	Large	3.45	1	127
8	HENRY	MAS	Mastiff	HENRYMAS38473	2005-12-28	M	12458	2005-05-01	2005-08-27	giant	0.87	1	128
1216	BARRY	MIX	Mix	BARRYMIX38473	2006-01-11	M	24093	2005-05-01	2005-05-13	.	2.76	1	130
1584	DUSTY	MPO	Miniature Poodle	DUSTYMPO38473	2006-01-21	F	43540	2005-05-01	2005-08-05	Small	4.14	1	131
3582	ELOISE	PUG	Pug	ELOISEPUG38473	2006-02-23	F	43970	2005-05-01	2006-02-14	Small	3.45	1	132
8058	ELF	MIX	Mix	ELFMIX38474	2006-04-27	M	16274	2005-05-02	2006-03-27	.	2.76	1	133
3745	MAIA	CSH	Chihuahua	MAIACSH38474	2006-02-27	F	17951	2005-05-02	2005-10-27	Toy	1.99	1	134
7354	DEUCE BIGALOW	CSH	Chihuahua	DEUCE BIGALOWCSH38474	2006-04-18	M	46942	2005-05-02	2006-04-09	Toy	3.45	1	135
2854	FOSTER	YRK	Yorkshire Terrier	FOSTERYRK38475	2006-02-14	M	17694	2005-05-03	2006-01-31	Toy	2.17	1	136
4536	MELVIN	DSC	Dachshund	MELVINDSC38476	2006-03-08	M	42753	2005-05-04	2006-02-14	Small	4.14	1	137
3559	BELLA	WES	West Highland Terrier	BELLAWES38476	2006-02-24	F	62954	2005-05-04	2005-09-24	Small	1.51	1	138
3297	KALAMELA	GER	German Shepard	KALAMELAGER38477	2006-02-17	F	36822	2005-05-05	2006-01-17	Large	3.45	1	139
6344	SHIRO	SBA	Shiba-inu	SHIROSBA38478	2006-04-04	F	16990	2005-05-06	2006-01-30	Small	2.17	1	140
1146	RANGER	SIB	Siberian Husky	RANGERSIB38478	2006-01-17	M	23541	2005-05-06	2005-08-24	Medium	0.38	0	142
3816	BELLA	HAV	Havanese	BELLAHAV38478	2006-02-28	F	41641	2005-05-06	2005-09-07	Toy	0.66	1	143
1120	ZEUS	DOB	Doberman Pinscher	ZEUSDOB38478	2006-01-17	M	67329	2005-05-06	2005-09-16	Large	0.13	0	144
17	DODO	MIS	Miniature Schnauzer	DODOMIS38479	2005-12-29	M	42813	2005-05-07	2005-12-01	Small	4.14	1	145
6794	BOOMER	BOR	Border Collie	BOOMERBOR38479	2006-04-11	M	46012	2005-05-07	2006-03-23	Medium	4.14	1	146
172	HERCULES	GER	German Shepard	HERCULESGER38480	2006-01-02	M	11886	2005-05-08	2005-12-09	Large	3.45	1	147
6272	IZZI	CSH	Chihuahua	IZZICSH38480	2006-03-31	F	46945	2005-05-08	2005-09-20	Toy	4.14	1	148
5300	KILLIAN	LAB	Labrador Retriever	KILLIANLAB38481	2006-03-15	M	15119	2005-05-09	2006-02-15	Large	4.14	1	149
8007	PYRA	MIX	Mix	PYRAMIX38481	2006-04-18	F	44694	2005-05-09	2005-09-10	.	0.66	1	150
616	GEORGIE	LAS	Lhasa Apso	GEORGIELAS38481	2006-01-09	M	71522	2005-05-09	2005-09-26	Small	3.46	1	151
967	DEZMOND	BOR	Border Collie	DEZMONDBOR38482	2006-01-14	M	14415	2005-05-10	2005-07-06	Medium	2.62	1	152
5781	DOZER	AST	Staffordshire Bull Terrier	DOZERAST38482	2006-03-23	M	19294	2005-05-10	2006-03-09	Medium	4.14	1	153
4771	PEPPER	LAB	Labrador Retriever	PEPPERLAB38483	2006-03-10	F	12609	2005-05-11	2006-02-07	Large	3.45	1	154
6437	SMOKIE	MIX	Mix	SMOKIEMIX38485	2006-04-03	M	44387	2005-05-13	2005-10-10	.	2.17	1	155
9000	YOKO	ROT	Rottweiler	YOKOROT38486	2006-05-05	F	23418	2005-05-14	2006-01-04	giant	0.17	0	156
9000	YOGA	ROT	Rottweiler	YOGAROT38486	2006-05-05	F	23592	2005-05-14	2006-01-04	giant	0.17	0	157
4635	GRACIE	MIX	Mix	GRACIEMIX38486	2006-03-09	F	44697	2005-05-14	2005-09-19	.	4.14	1	158
1703	MAX			MAX38487	2006-01-22	M	11555	2005-05-15	2005-09-20	.	1.51	1	159
6938	OLIVER	MIX	Mix	OLIVERMIX38487	2006-04-12	M	22384	2005-05-15	2005-08-29	.	2.76	1	160
6975	BOATSWAIN	MIN	Miniature Pinscher	BOATSWAINMIN38487	2006-04-06	M	23990	2005-05-15	2006-03-16	Toy	2.76	1	161
1743	JAMES	WHP	Whippet	JAMESWHP38487	2006-01-28	M	25412	2005-05-15	2005-09-17	Medium	0.22	0	162
972	MAX	MIS	Miniature Schnauzer	MAXMIS38487	2006-01-17	M	42294	2005-05-15	2005-09-13	Small	0.29	0	163
6204	COCO	NEO	Mastiff	COCONEO38487	2006-03-31	F	43877	2005-05-15	2005-10-14	giant	4.98	1	164
6204	ROCCO	NEO	Mastiff	ROCCONEO38487	2006-03-31	F	44258	2005-05-15	2005-10-14	giant	4.98	1	165
4861	ROXY	BOX	Boxer	ROXYBOX38487	2006-03-13	F	45038	2005-05-15	2005-12-12	Large	2.62	1	166
1059	SCRUFFY	WHW	West Highland Terrier	SCRUFFYWHW38489	2006-01-13	M	13979	2005-05-17	2005-12-09	Small	4.98	1	167
2407	SPIDER	PUG	Pug	SPIDERPUG38489	2006-02-07	M	26062	2005-05-17	2006-01-31	Small	2.17	1	168
204	MONA	MIN	Miniature Pinscher	MONAMIN38489	2006-01-03	F	41772	2005-05-17	2005-08-15	Toy	3.45	1	169
6002	CHIEF	RAT	Rat Terrier	CHIEFRAT38489	2006-03-25	M	46725	2005-05-17	2005-10-03	Small	0.87	1	170
7946	LILI	MIX	Mix	LILIMIX38490	2006-04-25	F	12452	2005-05-18	2006-04-12	.	2.76	1	171
1817	HEX	CBR	Chesapeake Bay Retriever	HEXCBR38490	2006-01-31	M	26972	2005-05-18	2005-09-14	Large	0.87	1	172
2246	P-NUT	SHI	Shih-tzu	P-NUTSHI38491	2006-02-06	M	41716	2005-05-19	2005-08-19	Small	4.98	1	173
9254	BANDIT	MAL	Alaskan Malamute	BANDITMAL38491	2006-05-15	M	63987	2005-05-19	2006-04-17	Large	4.14	1	174
1764	KOKE	SHI	Shih-tzu	KOKESHI38494	2006-01-27	M	15605	2005-05-22	2005-10-04	Small	1.15	1	175
1772	HINA	LAB	Labrador Retriever	HINALAB38494	2006-01-30	F	42528	2005-05-22	2005-12-15	Large	2.76	1	176
2778	DIAVOLINO'S CAJUN STYLE	ITI	Italian Grey Hound	DIAVOLINO'S CAJUN STYLEITI38495	2006-02-10	M	25561	2005-05-23	2005-12-03	Toy	1.99	1	177
6635	GLAMOUR	MLT	Maltese	GLAMOURMLT38495	2006-04-05	F	25873	2005-05-23	2006-02-22	Toy	4.98	1	178
7325	SHOKOLAD			SHOKOLAD38495	2006-04-17	M	42611	2005-05-23	2005-12-16	.	3.45	1	179
9308	STELLA	CSH	Chihuahua	STELLACSH38495	2006-05-16	F	71502	2005-05-23	2005-12-02	Toy	3.46	1	180
6966	COOPER	SHI	Shih-tzu	COOPERSHI38496	2006-04-07	F	26076	2005-05-24	2005-09-30	Small	2.76	1	181
1293	LEONARDO	LAB	Labrador Retriever	LEONARDOLAB38496	2006-01-20	M	44185	2005-05-24	2006-01-05	Large	2.76	1	182
3684	ROSSI	BOS	Boston Terrier	ROSSIBOS38497	2006-02-25	M	11606	2005-05-25	2005-09-01	Small	0.5	1	183
7439	TRISTAN	BIC	Bichon Frise	TRISTANBIC38497	2006-04-04	M	17785	2005-05-25	2006-01-26	Small	2.62	1	184
8982	HADLEY	BOR	Border Collie	HADLEYBOR38497	2006-05-10	F	41237	2005-05-25	2006-05-04	Medium	4.14	1	185
2221	LUNA	YRK	Yorkshire Terrier	LUNAYRK38497	2006-02-06	F	65756	2005-05-25	2005-09-27	Toy	4.98	1	186
30	MADDIE	GLD	Golden Retriever	MADDIEGLD38500	2005-12-29	F	42121	2005-05-28	2005-09-15	Large	0.29	0	187
6817	BUSTER	JRT	Jack Russell Terrier	BUSTERJRT38500	2006-04-06	M	44120	2005-05-28	2005-09-12	Small	0.38	0	188
3257	BOBBY	HAV	Havanese	BOBBYHAV38500	2006-02-21	M	67273	2005-05-28	2005-10-22	Toy	1.99	1	189
7695	MACK	MIX	Mix	MACKMIX38500	2006-04-21	M	71596	2005-05-28	2005-10-11	.	1.38	1	190
2652	TUNDRA	MAL	Alaskan Malamute	TUNDRAMAL38501	2006-02-08	F	17552	2005-05-29	2006-02-03	Large	4.98	1	191
6193	MILO	MIX	Mix	MILOMIX38502	2006-03-30	M	27324	2005-05-30	2006-03-20	.	4.98	1	192
5112	APPLESAUCE	MIX	Mix	APPLESAUCEMIX38502	2006-03-17	M	46585	2005-05-30	2005-09-23	.	1.51	1	193
6098	BAHIA	PPC	Perro de Pres Canario	BAHIAPPC38502	2006-03-31		79143	2005-05-30	2005-11-29	Large	3.45	1	194
8664	SASSY	GLD	Golden Retriever	SASSYGLD38504	2006-05-06	F	11547	2005-06-01	2005-10-16	Large	0.1	0	195
3296	MISS JACKIE	CSH	Chihuahua	MISS JACKIECSH38504	2006-02-15	F	15784	2005-06-01	2005-09-06	Toy	0.5	1	196
7371	RUSTY	YRK	Yorkshire Terrier	RUSTYYRK38504	2006-04-18	M	22386	2005-06-01	2005-09-21	Toy	1.15	1	197
7371	ROCCO	YRK	Yorkshire Terrier	ROCCOYRK38504	2006-04-18	M	22392	2005-06-01	2005-09-21	Toy	1.99	1	198
8228	OREO	FOX	Fox Terrier	OREOFOX38504	2006-04-22	F	37877	2005-06-01	2006-03-25	Small	1.75	1	199
6403	THUNDER	TPO	Toy Poodle	THUNDERTPO38504	2006-04-04	M	42385	2005-06-01	2006-02-10	Toy	2.17	1	200
7179	DEWEY	MIX	Mix	DEWEYMIX38504	2006-03-27	M	42412	2005-06-01	2006-02-14	.	4.14	1	201
238	YSABEL	CHI	Chihuahua	YSABELCHI38504	2006-01-03	F	44451	2005-06-01	2005-12-10	Toy	3.45	1	202
765	SCARLETT	MIX	Mix	SCARLETTMIX38504	2006-01-12	F	45063	2005-06-01	2005-10-14	.	1.51	1	203
4470	TARA	BOR	Border Collie	TARABOR38504	2006-03-08	F	65681	2005-06-01	2005-09-16	Medium	0.66	1	204
9196	GILLIAN	CHW	Chow Chow	GILLIANCHW38505	2006-05-11	F	16679	2005-06-02	2005-12-15	Medium	0.05	0	205
8662	PRECIOUS	BOX	Boxer	PRECIOUSBOX38506	2006-05-05	F	24048	2005-06-03	2006-05-05	Large	0.29	0	206
143	PAMELA			PAMELA38506	2005-12-30	F	39770	2005-06-03	2005-09-01	.	0.87	1	207
956	HAN	BEA	Beagle	HANBEA38506	2006-01-16	M	42768	2005-06-03	2005-12-09	Small	0.66	1	208
5190	CAPTAIN DUSTY	MIX	Mix	CAPTAIN DUSTYMIX38506	2006-03-17	M	43078	2005-06-03	2006-02-24	.	4.14	1	209
4329	LU	CAN	Canaan Dog	LUCAN38506	2006-03-04	F	67692	2005-06-03	2006-01-31	Medium	3.45	1	210
4791	KALINA	LAB	Labrador Retriever	KALINALAB38507	2006-03-13	F	44364	2005-06-04	2005-10-24	Large	0.5	1	211
8154	LUKE	CSH	Chihuahua	LUKECSH38508	2006-04-29	M	11759	2005-06-05	2005-10-10	Toy	2.76	1	212
1694	ALEX	PAP	Papillion	ALEXPAP38508	2006-01-27	M	64557	2005-06-05	2006-01-05	Toy	4.98	1	213
6907	BUCKLE	BEA	Beagle	BUCKLEBEA38509	2006-04-12	M	40992	2005-06-06	2006-03-21	Small	2.76	1	214
5426	FELIX	CSH	Chihuahua	FELIXCSH38509	2006-03-22	M	41072	2005-06-06	2005-09-27	Toy	1.99	1	215
2234	HIRO	SBA	Shiba-inu	HIROSBA38509	2006-02-06	M	43967	2005-06-06	2006-01-04	Small	4.98	1	216
4866	PICO	CSH	Chihuahua	PICOCSH38509	2006-03-13	F	45208	2005-06-06	2005-10-25	Toy	0.29	0	217
10207	LIO	GER	German Shepard	LIOGER38509	2006-05-31	M	67244	2005-06-06	2006-04-17	Large	4.98	1	218
3482	MOZE	GRT	Great Dane	MOZEGRT38509	2005-11-08	M	67385	2005-06-06	2005-10-04	giant	3.45	1	219
3145	HULA	EBD	English Bulldog	HULAEBD38510	2006-02-16	F	42966	2005-06-07	2005-12-23	Medium	4.14	1	220
9820	SHEP	BOR	Border Collie	SHEPBOR38511	2006-05-23	M	15441	2005-06-08	2005-10-29	Medium	0.22	0	221
735	SELMA	MIX	Mix	SELMAMIX38512	2006-01-12	F	1313	2005-06-09	2005-09-01	.	1.99	1	222
9030	WILLIE	PUG	Pug	WILLIEPUG38512	2006-05-11	M	23404	2005-06-09	2006-04-06	Small	4.14	1	223
956	SUMO	BEA	Beagle	SUMOBEA38512	2006-01-16	M	40486	2005-06-09	2005-12-09	Small	3.46	1	224
8481	MAN TAO	MLT	Maltese	MAN TAOMLT38512	2006-05-03		47102	2005-06-09	2006-05-03	Toy	0.05	0	225
8680	MICKEY	BOS	Boston Terrier	MICKEYBOS38512	2006-05-03	M	47133	2005-06-09	2006-04-07	Small	4.14	1	226
8028	LIZZIE	MIN	Miniature Pinscher	LIZZIEMIN38512	2006-04-26	F	77671	2005-06-09	2005-12-15	Toy	0.5	1	227
2255	LOLA	SPO	Standard Poodle	LOLASPO38512	2006-02-05	F	79249	2005-06-09	2005-09-09	Large	0.5	1	228
5743	COCO	LAB	Labrador Retriever	COCOLAB38513	2006-03-24	F	26134	2005-06-10	2005-10-04	Large	0.38	0	229
7300	MAILE	LAB	Labrador Retriever	MAILELAB38513	2006-04-12	F	39211	2005-06-10	2006-03-29	Large	3.45	1	231
3254	SAM	MIX	Mix	SAMMIX38513	2006-02-18	M	42538	2005-06-10	2006-01-23	.	3.45	1	232
2793	MOLLY	MIX	Mix	MOLLYMIX38513	2006-02-13	F	68696	2005-06-10	2005-09-08	.	3.45	1	233
6308	WILLOW	DLM	Dachshund	WILLOWDLM38514	2006-04-04	M	24435	2005-06-11	2006-03-03	Small	4.14	1	234
491	MOKO	DSM	Dachshund	MOKODSM38514	2006-01-07	M	40243	2005-06-11	2005-10-13	Small	4.14	1	235
1599	PIRY			PIRY38514	2006-01-20	M	65768	2005-06-11	2005-12-03	.	4.14	1	236
9438	DJ	PEMBROKE WELSH CORGI	Corgi	DJPEMBROKE WELSH CORGI38515	2006-05-15	M	17605	2005-06-12	2006-04-13	Small	4.98	1	237
567	OOLONG	ITI	Italian Grey Hound	OOLONGITI38515	2006-01-09	F	39253	2005-06-12	2005-12-07	Toy	0.87	1	238
10577		COT	Coton de Tuleire	COT38516	2006-06-06	M	18461	2005-06-13	2006-05-04	Small	4.98	1	239
7232	MALIA	GLD	Golden Retriever	MALIAGLD38516	2006-04-18	F	24243	2005-06-13	2005-10-20	Large	0.07	0	240
292	SAUERKRAUT	DCW	Dachshund	SAUERKRAUTDCW38518	2006-01-05	F	12580	2005-06-15	2005-11-30	Small	3.45	1	241
292	SCHNITZEL	DCW	Dachshund	SCHNITZELDCW38518	2006-01-05	F	12613	2005-06-15	2005-11-30	Small	3.45	1	242
11193	BUSTER	YRK	Yorkshire Terrier	BUSTERYRK38518	2006-06-14	M	23214	2005-06-15	2006-05-31	Toy	3.45	1	243
9840	CHIP	CSH	Chihuahua	CHIPCSH38518	2006-05-24	M	24268	2005-06-15	2006-01-25	Toy	3.45	1	244
9840	SPOOKY COOKY	CSH	Chihuahua	SPOOKY COOKYCSH38518	2006-05-24	F	26628	2005-06-15	2006-03-18	Toy	3.45	1	245
9840	PETER PAN	CSH	Chihuahua	PETER PANCSH38518	2006-05-24	M	26640	2005-06-15	2006-01-25	Toy	0.29	0	246
9840	SWEET PEA	CSH	Chihuahua	SWEET PEACSH38518	2006-05-24	F	26781	2005-06-15	2006-01-25	Toy	0.1	0	247
9840	BOUNCING BETTY	CSH	Chihuahua	BOUNCING BETTYCSH38518	2006-05-24	F	26820	2005-06-15	2006-01-25	Toy	1.99	1	248
9840	MIDNIGHT MAGIC	CSH	Chihuahua	MIDNIGHT MAGICCSH38518	2006-05-24	F	26928	2005-06-15	2006-01-25	Toy	0.66	1	249
9840	TWIGGY	CSH	Chihuahua	TWIGGYCSH38518	2006-05-24	F	27028	2005-06-15	2006-03-18	Toy	0.87	1	250
9840	ROGER	YRK	Yorkshire Terrier	ROGERYRK38518	2006-05-24	M	27311	2005-06-15	2006-01-25	Toy	1.15	1	251
8161	GORGEOUS	PAP	Papillion	GORGEOUSPAP38518	2006-04-26	F	38081	2005-06-15	2006-03-18	Toy	2.76	1	252
4632	CHICO	CSH	Chihuahua	CHICOCSH38518	2006-03-09	M	44182	2005-06-15	2005-12-13	Toy	4.14	1	253
5529	KODIAK	GLD	Golden Retriever	KODIAKGLD38518	2006-03-23	M	44662	2005-06-15	2006-03-17	Large	4.14	1	254
5312	DR FEEL GOOD	BOS	Boston Terrier	DR FEEL GOODBOS38518	2006-03-20	M	44755	2005-06-15	2006-02-24	Small	4.14	1	255
1886	SPOT	MIX	Mix	SPOTMIX38518	2006-01-27	M	66645	2005-06-15	2005-12-30	.	4.14	1	256
1886	SPIKE	MIX	Mix	SPIKEMIX38518	2006-01-27	M	66815	2005-06-15	2005-12-30	.	4.14	1	257
10901	MINI	POM	Pomeranian	MINIPOM38518	2006-05-19	F	68934	2005-06-15	2006-02-15	Toy	1.99	1	258
5327	HOB-B	SHT	Shetland Sheepdog	HOB-BSHT38519	2006-03-20	F	39420	2005-06-16	2006-02-16	Small	1.15	1	259
9253	NINA	BOS	Boston Terrier	NINABOS38519	2006-05-13	F	77813	2005-06-16	2006-05-06	Small	4.14	1	260
6430	STAR	GSP	German Shorthaired Pointer	STARGSP38520	2006-04-04	F	39762	2005-06-17	2006-02-21	Large	2.17	1	261
3491	ZEUS	CSH	Chihuahua	ZEUSCSH38520	2006-02-21	M	65761	2005-06-17	2006-01-24	Toy	1.15	1	262
8466	DAISY	LAB	Labrador Retriever	DAISYLAB38521	2006-05-03	F	41017	2005-06-18	2005-10-13	Large	1.99	1	263
157	KUMA	MIX	Mix	KUMAMIX38521	2005-12-30	M	41702	2005-06-18	2005-12-10	.	3.45	1	264
8746	LEGO	SHI	Shih-tzu	LEGOSHI38522	2006-05-08	M	19579	2005-06-19	2005-10-20	Small	4.14	1	265
8033	RABBLE ROUSER	MAN	Manchester Terrier	RABBLE ROUSERMAN38523	2006-04-25	M	36930	2005-06-20	2005-10-18	Small	2.76	1	266
1353	BAXTER			BAXTER38523	2006-01-23	M	41602	2005-06-20	2005-12-22	.	3.45	1	267
721	CASPER	LAB	Labrador Retriever	CASPERLAB38523	2006-01-12	M	44065	2005-06-20	2005-10-07	Large	0.22	0	268
10985	EMILY	CSH	Chihuahua	EMILYCSH38524	2006-05-22	F	25055	2005-06-21	2006-04-25	Toy	3.45	1	269
9404	ANGEL	GLD	Golden Retriever	ANGELGLD38524	2006-05-18	F	40213	2005-06-21	2006-01-18	Large	4.98	1	270
6710	EHUKAI	MIX	Mix	EHUKAIMIX38524	2006-04-07	F	43818	2005-06-21	2005-10-21	.	4.98	1	271
5137	GATOR	MIX	Mix	GATORMIX38525	2006-03-16	M	17810	2005-06-22	2006-02-17	.	4.98	1	272
7940	IETA	CSH	Chihuahua	IETACSH38525	2006-04-18	F	26662	2005-06-22	2005-10-05	Toy	0.66	1	273
4875	RYLEIGH	WES	West Highland Terrier	RYLEIGHWES38525	2006-03-13	M	42630	2005-06-22	2005-10-07	Small	1.51	1	274
7410	CORO	YRK	Yorkshire Terrier	COROYRK38525	2006-04-17	F	77758	2005-06-22	2005-10-20	Toy	3.45	1	275
10343	SKY	LAS	Lhasa Apso	SKYLAS38525	2006-06-01	M	78899	2005-06-22	2005-10-18	Small	0.29	0	276
1218	CHAI	CSH	Chihuahua	CHAICSH38526	2006-01-19	M	26686	2005-06-23	2006-01-04	Toy	2.76	1	277
1528	GUNNER	STS	Standard Schnauzer	GUNNERSTS38526	2006-01-26	M	34226	2005-06-23	2006-01-06	Medium	3.45	1	278
9296	JUNE	LAB	Labrador Retriever	JUNELAB38526	2006-05-16	F	41817	2005-06-23	2006-05-15	Large	0.1	0	279
3364	ISABELLE	TIB	Tibetan Terrier	ISABELLETIB38526	2006-02-21	F	42646	2005-06-23	2005-10-12	Medium	1.15	1	280
10431	ROSE			ROSE38527	2006-06-05	F	26750	2005-06-24	2006-05-11	.	4.14	1	281
5875	LAPIZ	MIN	Miniature Pinscher	LAPIZMIN38527	2006-03-28	M	78890	2005-06-24	2005-12-29	Toy	3.46	1	282
6325	VINCENT	BIC	Bichon Frise	VINCENTBIC38528	2006-04-03	M	18257	2005-06-25	2005-10-21	Small	1.15	1	283
8954	BABY YANKEE	YRK	Yorkshire Terrier	BABY YANKEEYRK38528	2006-05-12	M	23361	2005-06-25	2006-04-28	Toy	4.14	1	284
1889	AQUA	MIX	Mix	AQUAMIX38528	2006-02-01	M	24346	2005-06-25	2006-01-05	.	4.14	1	285
10343	PUFF	LAS	Lhasa Apso	PUFFLAS38528	2006-06-01	M	78936	2005-06-25	2005-11-03	Small	0.29	0	286
10888	MIKIE	CSH	Chihuahua	MIKIECSH38529	2006-06-09	M	9632	2005-06-26	2006-05-23	Toy	4.14	1	287
3103	PUNKIN	LAB	Labrador Retriever	PUNKINLAB38529	2006-02-16	F	44733	2005-06-26	2006-02-08	Large	3.45	1	288
1069	SPRINGSET CUSTOM MADE			SPRINGSET CUSTOM MADE38530	2006-01-17	M	12189	2005-06-27	2005-10-06	.	2.62	1	289
2887	SQUEAKER	MPO	Miniature Poodle	SQUEAKERMPO38530	2006-02-15	M	25838	2005-06-27	2005-12-14	Small	0.29	0	290
3330	BRUDER	WEI	Weimaraner	BRUDERWEI38531	2006-02-20	M	17507	2005-06-28	2006-01-13	Large	1.99	1	291
9961	MUMFORD	JRT	Jack Russell Terrier	MUMFORDJRT38531	2006-05-30	M	19382	2005-06-28	2005-10-11	Small	2.62	1	292
5823	MAYA	ROT	Rottweiler	MAYAROT38531	2006-03-27	F	26143	2005-06-28	2005-10-17	giant	0.17	0	293
6705	ARCHIE	LAB	Labrador Retriever	ARCHIELAB38532	2006-04-05	M	24212	2005-06-29	2005-12-14	Large	0.66	1	294
10122	MAX	MIS	Miniature Schnauzer	MAXMIS38532	2006-05-25	M	40327	2005-06-29	2005-09-15	Small	1.99	1	295
6832	LEMON	PAP	Papillion	LEMONPAP38532	2006-04-10	M	43589	2005-06-29	2005-12-30	Toy	4.14	1	296
4597	CHANCE	LAB	Labrador Retriever	CHANCELAB38533	2006-03-10	M	42832	2005-06-30	2005-11-16	Large	0.38	0	297
3110	MISHA	CCR	Chinese Crested	MISHACCR38533	2006-02-16	F	43416	2005-06-30	2006-01-24	Toy	3.45	1	298
950	BIA	BER	Bernese Mountain Dog	BIABER38533	2006-01-03	F	65797	2005-06-30	2005-10-01	Large	4.98	1	299
9655	D.O.G.	FBD	French Bulldog	D.O.G.FBD38534	2006-05-22	F	14416	2005-07-01	2006-05-08	Small	4.14	1	301
2787	NEMO	SCH	Schnauzer	NEMOSCH38534	2006-02-06	M	15595	2005-07-01	2005-12-13	Medium	3.45	1	302
12439	WINSTON	LAB	Labrador Retriever	WINSTONLAB38534	2006-06-30	M	23423	2005-07-01	2005-12-15	Large	4.98	1	303
2037	ROCKY	PIT	Pitbull Terrier	ROCKYPIT38534	2006-02-03	M	26090	2005-07-01	2006-01-10	Medium	4.98	1	304
9845	THATCHER	NEW	Newfoundland	THATCHERNEW38534	2006-05-24	F	38204	2005-07-01	2006-05-04	giant	3.45	1	305
6526	TASHA	MIX	Mix	TASHAMIX38534	2006-04-06	F	44087	2005-07-01	2006-03-06	.	1.51	1	306
3435	SNOWBALL	POM	Pomeranian	SNOWBALLPOM38534	2006-02-10	M	44392	2005-07-01	2005-12-26	Toy	3.45	1	307
6176	VICTOR			VICTOR38534	2006-04-03	M	47119	2005-07-01	2006-01-01	.	0.87	1	308
7709	BUDDY	LAB	Labrador Retriever	BUDDYLAB38534	2006-04-24	M	48001	2005-07-01	2005-10-24	Large	1.38	1	310
6662	FERBY	YRK	Yorkshire Terrier	FERBYYRK38534	2006-03-26	M	78926	2005-07-01	2006-02-22	Toy	4.98	1	311
7404	LILAH	GER	German Shepard	LILAHGER38535	2006-04-18	F	14681	2005-07-02	2006-01-02	Large	1.51	1	312
2408	BELLE			BELLE38535	2006-02-08	F	25691	2005-07-02	2005-10-11	.	0.29	0	313
5026	ENRICO			ENRICO38535	2006-03-13	M	67318	2005-07-02	2005-12-03	.	4.98	1	314
4839	TEQUILA	CSH	Chihuahua	TEQUILACSH38536	2006-03-13	F	43112	2005-07-03	2005-10-17	Toy	1.51	1	315
5458	AMBER	HAV	Havanese	AMBERHAV38536	2006-03-21	F	46432	2005-07-03	2005-10-13	Toy	4.14	1	317
5263	TOBY	MIS	Miniature Schnauzer	TOBYMIS38537	2006-03-17	M	11847	2005-07-04	2005-10-18	Small	0.5	1	318
10253	OSCAR	SHI	Shih-tzu	OSCARSHI38537	2006-06-01	M	14520	2005-07-04	2005-10-21	Small	3.45	1	319
7165	WELLINGTON	LAB	Labrador Retriever	WELLINGTONLAB38537	2006-04-14	M	22978	2005-07-04	2006-03-14	Large	4.14	1	320
10577		CSH	Chihuahua	CSH38538	2006-06-06	M	13913	2005-07-05	2006-05-04	Toy	4.98	1	321
10577		CSH	Chihuahua	CSH38538	2006-06-06	M	18651	2005-07-05	2006-05-04	Toy	4.98	1	322
10577		CSH	Chihuahua	CSH38538	2006-06-06	M	18717	2005-07-05	2006-05-04	Toy	4.98	1	323
1476	MUSASHI	YRK	Yorkshire Terrier	MUSASHIYRK38538	2006-01-21	M	25720	2005-07-05	2005-12-16	Toy	3.45	1	324
6786	MOLLY	CHI	Chihuahua	MOLLYCHI38538	2006-04-10	F	46906	2005-07-05	2006-03-21	Toy	4.14	1	325
4517	WHISPER	MIX	Mix	WHISPERMIX38539	2006-03-08	M	44261	2005-07-06	2005-11-09	.	1.15	1	326
9675	RAS	MIX	Mix	RASMIX38539	2006-05-22	F	46994	2005-07-06	2005-11-24	.	4.14	1	327
10586	JAGUAR			JAGUAR38540	2006-06-06	F	33884	2005-07-07	2006-05-04	.	4.98	1	328
993	MEGAN	SCT	Scottish Terrier	MEGANSCT38541	2006-01-12	F	15744	2005-07-08	2005-10-28	Small	4.98	1	329
5088	ELTON	JRT	Jack Russell Terrier	ELTONJRT38541	2006-03-16	M	37970	2005-07-08	2006-01-18	Small	1.99	1	330
9577	BILLABONG	MIX	Mix	BILLABONGMIX38542	2006-05-18	F	17318	2005-07-09	2006-02-02	.	4.14	1	331
1116	DOG#2	TPO	Toy Poodle	DOG#2TPO38542	2006-01-17	F	42899	2005-07-09	2005-12-13	Toy	2.76	1	332
1116	DOG#3	TPO	Toy Poodle	DOG#3TPO38542	2006-01-17	F	43545	2005-07-09	2005-12-13	Toy	2.76	1	333
6894	PARKER	BOS	Boston Terrier	PARKERBOS38544	2006-04-11	M	16183	2005-07-11	2005-12-26	Small	0.22	0	334
1520	SUSIE	DOB	Doberman Pinscher	SUSIEDOB38544	2006-01-23	F	38144	2005-07-11	2005-11-23	Large	0.38	0	335
5961	WINSTON	ESS	Springer Spaniel	WINSTONESS38545	2006-03-30	M	43515	2005-07-12	2006-02-25	Medium	3.45	1	337
1394	LOU LOU	ROD	Rhodesian Ridgeback	LOU LOUROD38545	2006-01-19	F	43869	2005-07-12	2005-12-19	Large	0.5	1	338
4817	OBI	BOR	Border Collie	OBIBOR38546	2006-03-14	M	17495	2005-07-13	2006-02-27	Medium	3.45	1	339
3311	SADIE	ESS	Springer Spaniel	SADIEESS38546	2006-02-16	F	17603	2005-07-13	2006-01-17	Medium	3.45	1	340
8122	LILO	PEK	Pekingese	LILOPEK38546	2006-04-29	F	43594	2005-07-13	2005-11-19	Toy	2.76	1	341
5867	CADOGAN	SCT	Scottish Terrier	CADOGANSCT38546	2006-03-27	M	47114	2005-07-13	2005-10-12	Small	0.87	1	342
546	SNOOPY			SNOOPY38547	2006-01-09	F	15144	2005-07-14	2005-11-17	.	0.87	1	343
9850	EMILY			EMILY38547	2006-05-24	F	31670	2005-07-14	2005-12-16	.	0.13	0	344
724	MJOLL	SIB	Siberian Husky	MJOLLSIB38547	2005-12-16	F	42156	2005-07-14	2005-12-01	Medium	2.62	1	345
6319	PICASSO	MLT	Maltese	PICASSOMLT38547	2006-04-04	M	42693	2005-07-14	2005-11-10	Toy	2.62	1	346
5531	IPO	POM	Pomeranian	IPOPOM38548	2006-03-16	M	10687	2005-07-15	2006-01-31	Toy	4.14	1	347
5333	LORENZO	BMS	Mastiff	LORENZOBMS38548	2006-03-21	M	11406	2005-07-15	2005-11-23	giant	0.17	0	348
4089	STRYKER	CSH	Chihuahua	STRYKERCSH38548	2006-03-02	M	22645	2005-07-15	2005-11-28	Toy	0.87	1	349
7373	GABRIEL	MLT	Maltese	GABRIELMLT38548	2006-04-19	M	27135	2005-07-15	2005-12-20	Toy	1.99	1	350
11305	TIGERLILLY	MIX	Mix	TIGERLILLYMIX38548	2006-06-16	F	40046	2005-07-15	2006-02-16	.	2.17	1	351
6756	WRIGLEY	DOB	Doberman Pinscher	WRIGLEYDOB38548	2006-04-07	M	40451	2005-07-15	2005-10-10	Large	4.98	1	352
4863	SID	CSH	Chihuahua	SIDCSH38548	2006-03-10	M	43139	2005-07-15	2005-11-16	Toy	4.14	1	353
261	CHANSEY	CHI	Chihuahua	CHANSEYCHI38548	2006-01-02	F	43166	2005-07-15	2005-12-13	Toy	3.45	1	354
2729	BLEU	MIX	Mix	BLEUMIX38548	2006-02-10	M	45903	2005-07-15	2006-01-15	.	3.45	1	355
9815	YODEL	ASI	Australian Shepard	YODELASI38548	2006-05-24	F	46287	2005-07-15	2006-05-17	Medium	3.45	1	356
9227	STELLA			STELLA38548	2006-05-15	F	66608	2005-07-15	2006-04-13	.	4.14	1	357
9625	BECKHAM	MLT	Maltese	BECKHAMMLT38549	2006-05-22	M	17171	2005-07-16	2005-11-12	Toy	1.15	1	358
1852	MILLY	MLT	Maltese	MILLYMLT38549	2006-01-30	F	24322	2005-07-16	2006-01-13	Toy	2.76	1	359
388	BANGER	GLD	Golden Retriever	BANGERGLD38549	2006-01-04	M	27192	2005-07-16	2005-11-29	Large	4.14	1	360
11657	TRIP	BOR	Border Collie	TRIPBOR38550	2006-06-20	M	15726	2005-07-17	2006-04-19	Medium	1.15	1	361
11657	RIDER	BOR	Border Collie	RIDERBOR38550	2006-06-20	M	15735	2005-07-17	2006-04-19	Medium	4.14	1	362
5005	REUBEN	ASI	Australian Shepard	REUBENASI38550	2006-03-14	M	26870	2005-07-17	2006-02-17	Medium	4.98	1	363
3205	TEAL'C	HUS	Husky	TEAL'CHUS38551	2006-02-17	M	14976	2005-07-18	2006-01-21	Medium	0.38	0	364
7116	KAISER	CSH	Chihuahua	KAISERCSH38551	2006-04-12	M	31725	2005-07-18	2005-11-02	Toy	0.66	1	365
6327	LEXIE	STS	Standard Schnauzer	LEXIESTS38551	2006-04-03	F	43028	2005-07-18	2005-10-20	Medium	0.5	1	366
3269	STIG	MIX	Mix	STIGMIX38551	2006-02-21	M	66540	2005-07-18	2005-10-24	.	1.99	1	367
470	POPPY	SPO	Standard Poodle	POPPYSPO38552	2006-01-09	F	27090	2005-07-19	2005-12-10	Large	4.14	1	368
1832	LUKE	MIS	Miniature Schnauzer	LUKEMIS38552	2006-01-25	M	27307	2005-07-19	2005-12-19	Small	0.87	1	369
3949	ULISES	YRK	Yorkshire Terrier	ULISESYRK38552	2006-02-23	M	67281	2005-07-19	2005-11-18	Toy	0.29	0	370
1005	BETTY	MAS	Mastiff	BETTYMAS38553	2006-01-17	F	10657	2005-07-20	2005-12-08	giant	1.99	1	371
9625	MIA	CSH	Chihuahua	MIACSH38553	2006-05-22	F	12522	2005-07-20	2005-11-12	Toy	1.51	1	372
10204	LOUIE	BOX	Boxer	LOUIEBOX38553	2006-05-30	M	42288	2005-07-20	2006-04-26	Large	4.98	1	373
1947	JENNA	COC	Cocker Spaniel	JENNACOC38553	2006-01-31	F	43789	2005-07-20	2006-01-01	Small	0.5	1	374
284	BABY	NEW	Newfoundland	BABYNEW38553	2006-01-04	F	44222	2005-07-20	2005-10-21	giant	1.15	1	375
7542	BECKHAM	EBD	English Bulldog	BECKHAMEBD38555	2006-04-22	M	27139	2005-07-22	2006-03-18	Medium	0.07	0	377
13789	BENTLEY	CLH	Chihuahua	BENTLEYCLH38555	2006-07-14	M	44790	2005-07-22	2006-07-06	Toy	2.17	1	378
7521	FRANCIS			FRANCIS38556	2006-04-20	M	42409	2005-07-23	2005-11-19	.	4.98	1	379
621	KOTARO	MIN	Miniature Pinscher	KOTAROMIN38557	2006-01-11	M	42469	2005-07-24	2005-12-14	Toy	4.98	1	380
3640	SHORTY	BOS	Boston Terrier	SHORTYBOS38557	2006-02-25	M	44102	2005-07-24	2006-02-01	Small	3.45	1	381
2813	MISKY	COC	Cocker Spaniel	MISKYCOC38557	2006-02-03	F	67342	2005-07-24	2005-12-15	Small	1.51	1	382
11460	MINIE	CSH	Chihuahua	MINIECSH38557	2006-04-26	F	78932	2005-07-24	2006-03-24	Toy	3.45	1	383
5227	ROXY	GLD	Golden Retriever	ROXYGLD38558	2006-03-16	F	14944	2005-07-25	2005-10-24	Large	1.51	1	385
4528	POPEYE	SPO	Standard Poodle	POPEYESPO38558	2006-03-08	M	43566	2005-07-25	2006-02-15	Large	4.14	1	386
3807	ELVIRA	BED	Bedlington Terrier	ELVIRABED38559	2006-02-27	F	40492	2005-07-26	2005-10-28	Small	3.46	1	387
7944	NIEN NIEN	WES	West Highland Terrier	NIEN NIENWES38559	2006-04-26	F	43119	2005-07-26	2005-11-17	Small	0.66	1	388
3631	HIWAKEA	SHI	Shih-tzu	HIWAKEASHI38560	2006-02-24	F	16179	2005-07-27	2006-01-19	Small	3.45	1	389
1279	GABRIEL	TMT	Toy Manchester Terrier	GABRIELTMT38560	2006-01-22	M	25828	2005-07-27	2005-12-04	Toy	0.04	0	390
13490	ROXIE	BOX	Boxer	ROXIEBOX38560	2006-07-20	F	28506	2005-07-27	2005-10-20	Large	0.1	0	391
1829	LOLA	MIX	Mix	LOLAMIX38560	2006-01-31	F	43020	2005-07-27	2006-01-25	.	2.76	1	392
5356	FLASH	ECS	Cocker Spaniel	FLASHECS38561	2006-03-20	M	9655	2005-07-28	2005-10-21	Small	1.15	1	393
6912	CHARLIE BROWN	JRT	Jack Russell Terrier	CHARLIE BROWNJRT38561	2006-04-11	M	40624	2005-07-28	2005-11-22	Small	2.76	1	394
12018	SUGAR	BOX	Boxer	SUGARBOX38562	2006-06-28	F	9287	2005-07-29	2005-12-02	Large	2.62	1	395
1832	VINNY	MIS	Miniature Schnauzer	VINNYMIS38562	2006-01-25	M	17589	2005-07-29	2005-11-29	Small	1.51	1	396
2098	ROXY			ROXY38563	2006-02-01	F	10809	2005-07-30	2005-10-24	.	1.51	1	397
4799	AJAX	BIC	Bichon Frise	AJAXBIC38563	2006-03-09	M	16345	2005-07-30	2006-01-21	Small	3.45	1	398
14019	ATTICUS	GER	German Shepard	ATTICUSGER38563	2006-07-28	M	48446	2005-07-30	2006-05-31	Large	2.17	1	399
8615	HAMISH	CRN	Cairn Terrier	HAMISHCRN38563	2006-05-05	M	66035	2005-07-30	2006-03-24	Small	4.14	1	400
1963	PHOENIX	GRT	Great Dane	PHOENIXGRT38563	2006-02-01	F	68668	2005-07-30	2006-01-11	giant	4.14	1	401
5824	HAMISH	WES	West Highland Terrier	HAMISHWES38564	2006-03-25	M	44486	2005-07-31	2006-01-30	Small	4.98	1	402
8082	BEETLE JUICE	DCL	Dachshund	BEETLE JUICEDCL38565	2006-04-28	F	14988	2005-08-01	2006-04-04	Small	2.76	1	403
5672	ACE	BEA	Beagle	ACEBEA38565	2006-03-23	M	17714	2005-08-01	2006-03-16	Small	3.45	1	404
10425	RYLAN	PIT	Pitbull Terrier	RYLANPIT38565	2006-05-16	M	22372	2005-08-01	2006-04-11	Medium	4.14	1	405
4241	NAPOLEON	BER	Bernese Mountain Dog	NAPOLEONBER38565	2006-03-01	M	26651	2005-08-01	2005-12-02	Large	0.87	1	406
1448	CHOC. LAB			CHOC. LAB38565	2006-01-16	M	32804	2005-08-01	2005-12-05	.	3.45	1	407
6013	COOKIE	MIX	Mix	COOKIEMIX38565	2006-03-28	F	42509	2005-08-01	2006-03-14	.	3.45	1	409
1386	ALFIE	MIS	Miniature Schnauzer	ALFIEMIS38565	2006-01-23	M	42697	2005-08-01	2005-11-07	Small	0.29	0	410
8693	GUNNER	LAB	Labrador Retriever	GUNNERLAB38565	2006-05-09	M	45830	2005-08-01	2006-04-11	Large	4.14	1	411
12617	CHARLIE	ASI	Australian Shepard	CHARLIEASI38565	2006-07-05	M	46377	2005-08-01	2006-05-01	Medium	4.14	1	412
14301	LILLY	PIT	Pitbull Terrier	LILLYPIT38565	2006-07-31	F	47865	2005-08-01	2006-06-21	Medium	4.98	1	413
9142	ZIPPER	JRT	Jack Russell Terrier	ZIPPERJRT38565	2006-05-11		68904	2005-08-01	2006-03-30	Small	4.98	1	414
10337	SPROCKETT	SPO	Standard Poodle	SPROCKETTSPO38566	2006-06-02	M	12630	2005-08-02	2005-11-04	Large	0.07	0	415
253	FEMALE FOX HOUND			FEMALE FOX HOUND38566	2006-01-04	F	23532	2005-08-02	2005-12-08	.	0.87	1	416
6643	LUKAS	GER	German Shepard	LUKASGER38566	2006-04-04	M	43957	2005-08-02	2005-11-14	Large	1.99	1	417
83	COCO	TPO	Toy Poodle	COCOTPO38567	2005-12-30	F	41116	2005-08-03	2005-11-30	Toy	4.14	1	418
4333	PARAMOUNT EXPRESSO	CHW	Chow Chow	PARAMOUNT EXPRESSOCHW38567	2006-03-07	M	42167	2005-08-03	2005-11-04	Medium	0.1	0	419
1408		JRT	Jack Russell Terrier	JRT38568	2006-01-20	M	10800	2005-08-04	2005-10-28	Small	1.15	1	421
684	KOALANI	SBA	Shiba-inu	KOALANISBA38569	2006-01-10	F	43875	2005-08-05	2005-12-20	Small	4.98	1	422
14425	STELLA	AFG	Afghan Hound	STELLAAFG38569	2006-08-03	F	46406	2005-08-05	2005-11-26	Large	1.15	1	423
14425	RAVE	AFG	Afghan Hound	RAVEAFG38569	2006-08-03	F	47964	2005-08-05	2005-11-26	Large	0.66	1	424
4018	PIKO			PIKO38570	2006-02-28	M	43144	2005-08-06	2005-11-29	.	3.45	1	425
10413	TEQUILA	MIX	Mix	TEQUILAMIX38570	2006-05-10	F	67724	2005-08-06	2006-02-28	.	4.14	1	426
1564	MERIT	GLD	Golden Retriever	MERITGLD38571	2006-01-25	F	14410	2005-08-07	2005-11-26	Large	1.99	1	427
3743	NALA	PIT	Pitbull Terrier	NALAPIT38571	2006-02-27	F	41270	2005-08-07	2005-12-06	Medium	0.29	0	428
7142	MILO	SHI	Shih-tzu	MILOSHI38571	2006-04-17	M	41439	2005-08-07	2005-11-28	Small	4.14	1	429
5673	SOPHIE	PEK	Pekingese	SOPHIEPEK38571	2006-03-24	F	43855	2005-08-07	2006-03-02	Toy	1.99	1	430
6282	ALEX	PWD	Portugese Water Dog	ALEXPWD38571	2006-03-03	M	44474	2005-08-07	2005-11-08	Medium	1.51	1	431
1931	ADAM			ADAM38571	2006-01-30	M	66735	2005-08-07	2005-10-18	.	4.14	1	432
167	ZOEY	BOS	Boston Terrier	ZOEYBOS38572	2006-01-02	F	25752	2005-08-08	2005-12-12	Small	3.45	1	433
3717	CALVIN	HAV	Havanese	CALVINHAV38572	2006-02-24	M	41615	2005-08-08	2005-12-06	Toy	0.66	1	434
177	SPINNER	GLD	Golden Retriever	SPINNERGLD38572	2006-01-03	F	42968	2005-08-08	2005-11-29	Large	3.45	1	435
8911	KOA			KOA38572	2006-05-11	M	43752	2005-08-08	2006-03-14	.	3.45	1	436
12321	RIVER	STB	St. Bernard	RIVERSTB38572	2006-07-05	F	44030	2005-08-08	2005-12-07	giant	0.5	1	437
9933	SHAZARA	POM	Pomeranian	SHAZARAPOM38573	2006-05-25	F	42485	2005-08-09	2006-04-25	Toy	4.98	1	438
6044	JOE	FOX	Fox Terrier	JOEFOX38573	2006-02-20	F	67300	2005-08-09	2005-11-16	Small	3.45	1	439
6512	PRINCE	GSP	German Shorthaired Pointer	PRINCEGSP38574	2006-04-05	M	27321	2005-08-10	2005-11-10	Large	0.04	0	441
868	HICKORY	NEH	Norwegian Elk Hound	HICKORYNEH38574	2006-01-16	M	42746	2005-08-10	2005-12-07	Medium	4.98	1	442
736	CASH			CASH38574	2006-01-12	M	43827	2005-08-10	2005-12-19	.	4.98	1	443
14502	TRUMAN	CWC	Corgi	TRUMANCWC38574	2006-08-08	M	48428	2005-08-10	2006-01-12	Small	3.45	1	444
9257	DIPPITY DOG			DIPPITY DOG38574	2006-04-18	F	67357	2005-08-10	2006-02-07	.	0.29	0	445
11661	LILO	YRK	Yorkshire Terrier	LILOYRK38575	2006-06-19	F	8034	2005-08-11	2006-01-30	Toy	1.99	1	446
10996	CAITI	GER	German Shepard	CAITIGER38575	2006-06-09	M	16245	2005-08-11	2006-05-19	Large	1.15	1	447
4163	LOA	DAL	Dalmatian	LOADAL38575	2006-03-05	M	32120	2005-08-11	2005-12-18	Medium	4.98	1	448
6307	OZZIE	BOR	Border Collie	OZZIEBOR38576	2006-04-03	M	23192	2005-08-12	2005-12-15	Medium	4.14	1	449
9998	DUDU	MIS	Miniature Schnauzer	DUDUMIS38576	2006-05-25	M	41856	2005-08-12	2005-12-07	Small	0.07	0	450
12909	KOA	GLD	Golden Retriever	KOAGLD38576	2006-07-12	M	42699	2005-08-12	2006-04-13	Large	4.98	1	451
667	SOPHIE	CBR	Chesapeake Bay Retriever	SOPHIECBR38576	2006-01-09	F	43446	2005-08-12	2005-11-02	Large	0.66	1	452
14004	PETUNIA	PUG	Pug	PETUNIAPUG38576	2006-07-31	F	45117	2005-08-12	2006-07-06	Small	2.17	1	453
6176	NAHANNI			NAHANNI38578	2006-04-03	F	41048	2005-08-14	2005-11-16	.	3.46	1	455
8433	MAX	RAT	Rat Terrier	MAXRAT38578	2006-05-04	M	48006	2005-08-14	2006-04-08	Small	3.45	1	456
5202	WESTON	COCKAPOO	Cockapoo	WESTONCOCKAPOO38579	2006-03-17	M	11883	2005-08-15	2006-02-16	Small	4.14	1	457
7531	ZEN	ROT	Rottweiler	ZENROT38579	2006-04-20	M	14662	2005-08-15	2005-12-13	giant	0.66	1	458
2952	ROSIE	MIX	Mix	ROSIEMIX38579	2006-02-13	F	14727	2005-08-15	2006-01-05	.	2.76	1	459
7434	MILES	WHP	Whippet	MILESWHP38579	2006-04-13	M	15187	2005-08-15	2006-02-23	Medium	4.98	1	460
6341	JAZZIE	MIX	Mix	JAZZIEMIX38579	2006-03-30	F	41567	2005-08-15	2006-01-24	.	0.38	0	461
34	CHICO	CLH	Chihuahua	CHICOCLH38579	2005-12-27	M	41809	2005-08-15	2005-11-21	Toy	4.14	1	462
1752	SIN	LAB	Labrador Retriever	SINLAB38579	2006-01-28	F	44204	2005-08-15	2005-11-26	Large	3.46	1	463
2475	MATT	FBD	French Bulldog	MATTFBD38579	2006-02-06	M	45065	2005-08-15	2005-12-16	Small	0.5	1	464
2475	SPORT	FBD	French Bulldog	SPORTFBD38579	2006-02-06	M	45424	2005-08-15	2005-12-16	Small	0.29	0	465
11783	MOCHA	FRENCH MASTIFF	Mastiff	MOCHAFRENCH MASTIFF38579	2006-06-22	F	46897	2005-08-15	2006-01-30	giant	1.51	1	466
4033	LINDA	DSC	Dachshund	LINDADSC38579	2006-03-01	F	78940	2005-08-15	2006-01-25	Small	1.15	1	467
5894	GANDALF	GLD	Golden Retriever	GANDALFGLD38579	2006-03-28	M	78966	2005-08-15	2005-12-16	Large	0.66	1	468
4943	DEANA			DEANA38580	2006-03-13	F	24374	2005-08-16	2005-12-17	.	1.15	1	469
663	CANDY	MAS	Mastiff	CANDYMAS38580	2006-01-09	F	37093	2005-08-16	2005-11-17	giant	4.98	1	470
663	TROY	MAS	Mastiff	TROYMAS38580	2006-01-09	M	37954	2005-08-16	2005-11-17	giant	2.62	1	471
3244	BUSTER	BEA	Beagle	BUSTERBEA38581	2006-02-13	M	66632	2005-08-17	2006-01-16	Small	4.14	1	472
14418	BLAZE	LAB	Labrador Retriever	BLAZELAB38581	2006-08-04	F	69429	2005-08-17	2005-11-28	Large	0.29	0	473
5864	ROY			ROY38581	2006-03-27	M	77830	2005-08-17	2006-02-27	.	4.98	1	474
11312	TAZZ	MIX	Mix	TAZZMIX38581	2006-06-13	M	77886	2005-08-17	2006-05-24	.	2.17	1	475
6503	LOLITA	CSH	Chihuahua	LOLITACSH38582	2006-04-04	F	26665	2005-08-18	2005-12-09	Toy	1.51	1	476
6806	MO	PUG	Pug	MOPUG38582	2006-04-10	M	41255	2005-08-18	2006-02-24	Small	0.66	1	477
3216	JAY CEE	PIT	Pitbull Terrier	JAY CEEPIT38583	2006-02-20	M	13607	2005-08-19	2005-11-19	Medium	1.15	1	478
8535	CHARLIE	KCS	King Charles Spaniel	CHARLIEKCS38583	2006-05-05	M	27999	2005-08-19	2006-01-03	Toy	0.5	1	479
6714	RINGO	JRT	Jack Russell Terrier	RINGOJRT38583	2006-04-07	M	42516	2005-08-19	2006-03-02	Small	4.98	1	480
1188	MILO	ROT	Rottweiler	MILOROT38583	2006-01-21	M	43506	2005-08-19	2005-12-19	giant	1.51	1	481
10544	WHITNEY	TPO	Toy Poodle	WHITNEYTPO38583	2006-06-05	F	44024	2005-08-19	2006-02-22	Toy	1.15	1	482
2126	KIKA	RAT	Rat Terrier	KIKARAT38583	2006-02-03	F	45494	2005-08-19	2005-11-21	Small	0.38	0	483
11107	BELLE	FBD	French Bulldog	BELLEFBD38584	2006-06-12	F	44650	2005-08-20	2006-04-18	Small	0.22	0	484
4602	BIRINCI'S BASRA	ANATOLIAN SHEP.	Anatolian Shepard	BIRINCI'S BASRAANATOLIAN SHEP.38584	2006-03-08	F	45204	2005-08-20	2006-02-08	giant	4.14	1	485
2658	ALEX	POM	Pomeranian	ALEXPOM38585	2006-02-13	M	25677	2005-08-21	2006-01-03	Toy	1.99	1	486
957	BENTLEY	IWS	Irish Water Spaniel	BENTLEYIWS38585	2006-01-13	M	39745	2005-08-21	2005-12-13	Large	0.5	1	487
13340	OTTO	ROT	Rottweiler	OTTOROT38585	2006-07-18	M	68978	2005-08-21	2006-03-18	giant	3.45	1	488
13343	SAMSON	ROT	Rottweiler	SAMSONROT38585	2006-07-17	M	68979	2005-08-21	2006-03-18	giant	3.45	1	489
8371	BUDDY	GLD	Golden Retriever	BUDDYGLD38586	2006-05-02	M	26089	2005-08-22	2005-12-20	Large	0.17	0	490
7991	TOSH	PIT	Pitbull Terrier	TOSHPIT38586	2006-04-25	M	40528	2005-08-22	2006-03-14	Medium	2.76	1	491
1083	HAYDEN			HAYDEN38586	2006-01-13	M	66706	2005-08-22	2005-12-15	.	4.98	1	492
7736	SPROCKET	ASI	Australian Shepard	SPROCKETASI38588	2006-04-24	F	23113	2005-08-24	2006-04-04	Medium	1.38	1	493
1568	MADDIE	DCW	Dachshund	MADDIEDCW38588	2006-01-24	F	42759	2005-08-24	2005-12-21	Small	0.1	0	494
5119	WISCOYS HERO AT TOPTAIL	LAB	Labrador Retriever	WISCOYS HERO AT TOPTAILLAB38588	2006-03-16	M	44724	2005-08-24	2006-01-23	Large	0.5	1	495
4126	CALEB			CALEB38589	2006-02-28	M	13219	2005-08-25	2006-01-09	.	2.62	1	496
12340	BELLE	EST	English Setter	BELLEEST38589	2006-07-05	F	27920	2005-08-25	2006-06-12	Large	4.98	1	497
4698	CHARLIE	WES	West Highland Terrier	CHARLIEWES38589	2006-03-10	M	42834	2005-08-25	2005-12-12	Small	0.66	1	498
5226	DIXIE	YRK	Yorkshire Terrier	DIXIEYRK38590	2006-03-16	M	15855	2005-08-26	2005-12-08	Toy	0.87	1	499
9526	CUB	POM	Pomeranian	CUBPOM38591	2006-05-19	M	12181	2005-08-27	2005-11-26	Toy	2.62	1	500
9698	PEBBLES	YRK	Yorkshire Terrier	PEBBLESYRK38591	2006-05-23	F	23425	2005-08-27	2006-01-05	Toy	1.15	1	501
11812	MILADYS	SPO	Standard Poodle	MILADYSSPO38591	2006-06-22	F	45740	2005-08-27	2005-12-01	Large	0.04	0	502
9729	BISCUIT			BISCUIT38592	2006-05-23	M	43553	2005-08-28	2006-01-23	.	4.14	1	504
3491	MONO	CSH	Chihuahua	MONOCSH38592	2006-02-21	M	65765	2005-08-28	2006-01-24	Toy	3.45	1	505
3552	ALMA	KUV	Kuvasz	ALMAKUV38593	2006-02-23	F	9765	2005-08-29	2006-01-05	giant	1.99	1	506
9475	CHICA	BOX	Boxer	CHICABOX38593	2006-05-18	F	12651	2005-08-29	2005-12-27	Large	1.15	1	507
10642	COHAN	MIX	Mix	COHANMIX38593	2006-06-03	M	47069	2005-08-29	2006-05-13	.	4.14	1	508
3659	DORIS	TPO	Toy Poodle	DORISTPO38594	2006-02-14	F	45260	2005-08-30	2006-01-12	Toy	3.46	1	509
10928	KATRINA	YRK	Yorkshire Terrier	KATRINAYRK38594	2006-06-09	F	48211	2005-08-30	2005-12-24	Toy	2.62	1	510
1982	PHOENIX	TIB	Tibetan Terrier	PHOENIXTIB38595	2006-02-02	M	41329	2005-08-31	2006-01-02	Medium	1.51	1	511
2782	SOCKS	MIX	Mix	SOCKSMIX38595	2006-02-14	F	43019	2005-08-31	2006-01-07	.	1.51	1	512
15659	THEO	MIX	Mix	THEOMIX38596	2006-08-26	M	212	2005-09-01	2006-06-22	.	2.76	1	513
13549	CHAUCER	MIX	Mix	CHAUCERMIX38596	2006-07-21	M	15378	2005-09-01	2006-05-30	.	3.45	1	514
9872	RUBI	BDT	Border Terrier	RUBIBDT38596	2006-05-25	F	17135	2005-09-01	2006-01-23	Small	0.5	1	515
5431	JJ	DOB	Doberman Pinscher	JJDOB38596	2006-03-21	M	17708	2005-09-01	2006-02-21	Large	1.15	1	516
15045	BUCK	LAB	Labrador Retriever	BUCKLAB38596	2006-08-15	M	23157	2005-09-01	2006-07-20	Large	2.17	1	517
5690	BARKLEY	YRK	Yorkshire Terrier	BARKLEYYRK38596	2006-03-23	M	23441	2005-09-01	2006-01-20	Toy	3.45	1	518
5687	TESS			TESS38596	2006-03-24	F	24421	2005-09-01	2006-03-02	.	1.99	1	519
5982	BRANDY	GER	German Shepard	BRANDYGER38596	2006-03-29	M	26073	2005-09-01	2006-03-01	Large	3.45	1	520
916	CLOUD	LAB	Labrador Retriever	CLOUDLAB38596	2006-01-12	F	41559	2005-09-01	2005-12-13	Large	3.46	1	521
916	SILIGHTENING	LAB	Labrador Retriever	SILIGHTENINGLAB38596	2006-01-12	F	41845	2005-09-01	2005-12-06	Large	0.66	1	522
4561	SATIN GIRL	FBD	French Bulldog	SATIN GIRLFBD38596	2006-03-09	F	43287	2005-09-01	2006-01-23	Small	0.87	1	523
10185	KAY	ESS	Springer Spaniel	KAYESS38596	2006-05-26	F	44379	2005-09-01	2006-04-06	Medium	4.98	1	524
9323	FREEBIE	PIT	Pitbull Terrier	FREEBIEPIT38596	2006-05-16	F	45085	2005-09-01	2006-03-07	Medium	1.51	1	525
5046	ORANGE			ORANGE38596	2006-03-15	F	46847	2005-09-01	2006-02-21	.	4.98	1	526
14713	SILVER PARKS	ACD	Australian Cattle Dog	SILVER PARKSACD38596	2006-08-10	F	64612	2005-09-01	2006-07-03	Medium	3.45	1	527
6044	JOCK	FOX	Fox Terrier	JOCKFOX38596	2006-02-20	M	67236	2005-09-01	2005-11-16	Small	3.45	1	528
10632	LINDLEY	ABD	Bulldog	LINDLEYABD38597	2006-06-01	M	22489	2005-09-02	2006-06-01	Large	0.22	0	529
1104	JAMIE	WEI	Weimaraner	JAMIEWEI38597	2006-01-16	F	41551	2005-09-02	2005-12-16	Large	2.76	1	530
15180	ZEPPELIN	MIX	Mix	ZEPPELINMIX38598	2006-08-19	M	11928	2005-09-03	2005-12-16	.	2.76	1	531
5120	CINDERS	LAB	Labrador Retriever	CINDERSLAB38598	2006-03-17	F	12829	2005-09-03	2006-01-30	Large	1.99	1	532
11249	SAMMY	MLT	Maltese	SAMMYMLT38598	2006-06-06	M	27538	2005-09-03	2006-01-25	Toy	3.45	1	533
8843		COTON	Coton de Tuleire	COTON38599	2006-05-04	F	14403	2005-09-04	2006-03-10	Small	3.45	1	534
8843		COTON	Coton de Tuleire	COTON38599	2006-05-04	F	14444	2005-09-04	2006-03-10	Small	3.45	1	535
8843		COTON	Coton de Tuleire	COTON38599	2006-05-04	F	14472	2005-09-04	2006-03-10	Small	3.45	1	536
8843		COTON	Coton de Tuleire	COTON38599	2006-05-04	F	14526	2005-09-04	2006-03-10	Small	3.45	1	537
8843		COTON	Coton de Tuleire	COTON38599	2006-05-04	F	14558	2005-09-04	2006-03-10	Small	3.45	1	538
8843		COTON	Coton de Tuleire	COTON38599	2006-05-04	F	14560	2005-09-04	2006-03-10	Small	3.45	1	539
8843		COTON	Coton de Tuleire	COTON38599	2006-05-04	F	14625	2005-09-04	2006-03-10	Small	3.45	1	540
916	THUNDER	LAB	Labrador Retriever	THUNDERLAB38599	2006-01-12	M	41560	2005-09-04	2005-12-13	Large	0.66	1	541
6662	SUNNY			SUNNY38599	2006-04-03	M	78924	2005-09-04	2006-02-02	.	0.87	1	542
253	MALE FOX HOUND			MALE FOX HOUND38600	2006-01-04	M	23411	2005-09-05	2005-12-08	.	0.87	1	543
11593	SUGARDROPS LOLLIE POP	CSH	Chihuahua	SUGARDROPS LOLLIE POPCSH38600	2006-06-19	F	27329	2005-09-05	2006-05-09	Toy	4.98	1	544
14949	ASCOT	CDT	Coton de Tuleire	ASCOTCDT38600	2006-08-15	M	38702	2005-09-05	2006-02-18	Small	0.22	0	545
11289	SALLY	SHT	Shetland Sheepdog	SALLYSHT38600	2006-06-15	F	40508	2005-09-05	2005-12-29	Small	3.45	1	546
9721	CHELSEA	JRT	Jack Russell Terrier	CHELSEAJRT38600	2006-05-23	F	44623	2005-09-05	2006-04-15	Small	4.14	1	547
6176	KAMOTO			KAMOTO38601	2006-04-03	M	43536	2005-09-06	2005-11-30	.	1.51	1	548
10166	COCO	RAT	Rat Terrier	COCORAT38602	2006-05-30	F	22229	2005-09-07	2006-01-23	Small	4.98	1	549
3580	MAC	WET	Wheaten Terrier	MACWET38602	2006-02-23	M	44003	2005-09-07	2006-01-24	Medium	3.45	1	550
7931	FRODO	MIX	Mix	FRODOMIX38603	2006-04-27	M	16028	2005-09-08	2005-12-26	.	2.76	1	551
9174	KARMA	MIX	Mix	KARMAMIX38603	2006-05-16	F	46726	2005-09-08	2006-02-13	.	0.22	0	552
3483	STORM	SFT	Fox Terrier	STORMSFT38604	2006-02-20	F	17737	2005-09-09	2005-12-15	Small	3.45	1	553
2902	NOEL	MIX	Mix	NOELMIX38604	2006-02-10	F	40824	2005-09-09	2005-12-27	.	2.17	1	554
9024	TRIXIE	ABD	Bulldog	TRIXIEABD38604	2006-05-14	F	42795	2005-09-09	2006-05-01	Large	4.14	1	555
6489	WASABI			WASABI38604	2006-04-04	F	78901	2005-09-09	2006-03-21	.	2.76	1	556
856	NANO	STS	Standard Schnauzer	NANOSTS38604	2006-01-08	M	78937	2005-09-09	2005-12-08	Medium	4.98	1	558
15420	TEDDY	FOX	Fox Terrier	TEDDYFOX38605	2006-08-22	M	39111	2005-09-10	2006-01-25	Small	2.62	1	559
13660	HENRY	BOX	Boxer	HENRYBOX38605	2006-07-22	M	41639	2005-09-10	2005-12-13	Large	1.15	1	560
1439	TOBY	COC	Cocker Spaniel	TOBYCOC38607	2006-01-24	M	42628	2005-09-12	2005-12-15	Small	3.45	1	561
49	SPUDLEY	ACD	Australian Cattle Dog	SPUDLEYACD38607	2005-12-29	M	42721	2005-09-12	2005-11-29	Medium	1.15	1	562
4778	BLUE	PIT	Pitbull Terrier	BLUEPIT38607	2006-03-13	M	43861	2005-09-12	2006-02-13	Medium	3.45	1	563
13449	BALI	POM	Pomeranian	BALIPOM38607	2006-07-20	M	43929	2005-09-12	2006-01-10	Toy	1.51	1	564
8128	VALERIE	SPO	Standard Poodle	VALERIESPO38607	2006-04-26	F	44932	2005-09-12	2006-03-02	Large	2.76	1	565
2221	THOMAS	YRK	Yorkshire Terrier	THOMASYRK38608	2006-02-06	M	65759	2005-09-13	2006-01-10	Toy	4.98	1	566
2248	PATXI	BEA	Beagle	PATXIBEA38609	2006-02-01	M	67326	2005-09-14	2005-12-26	Small	0.22	0	567
5382	SPOOKY	YRK	Yorkshire Terrier	SPOOKYYRK38609	2006-03-22	F	71694	2005-09-14	2006-02-10	Toy	4.14	1	568
60	MAVERICK	SAM	Samoyed	MAVERICKSAM38610	2005-12-30	M	15073	2005-09-15	2005-12-01	Medium	1.99	1	569
60	GYPSY	SAM	Samoyed	GYPSYSAM38610	2005-12-30	F	15181	2005-09-15	2005-12-01	Medium	2.62	1	570
15482	ELLIE	MIX	Mix	ELLIEMIX38610	2006-08-15	F	15283	2005-09-15	2006-06-06	.	2.76	1	571
3593	VIOLET			VIOLET38610	2006-02-22	F	16107	2005-09-15	2006-01-28	.	3.45	1	572
9186	RUBEN	COC	Cocker Spaniel	RUBENCOC38610	2006-05-13	M	23176	2005-09-15	2006-04-08	Small	1.99	1	574
5622	PUGLA	PUG	Pug	PUGLAPUG38610	2006-03-23	F	23879	2005-09-15	2006-02-09	Small	1.15	1	575
8925	ALAQUA	TPO	Toy Poodle	ALAQUATPO38610	2006-05-10	F	25961	2005-09-15	2006-04-04	Toy	3.45	1	576
13871	ARTHUR	BOX	Boxer	ARTHURBOX38610	2006-07-27	M	28478	2005-09-15	2006-06-22	Large	4.98	1	577
1380	STAR	MIX	Mix	STARMIX38610	2006-01-20	F	42137	2005-09-15	2005-12-21	.	3.45	1	578
60	DREAMER II	SAM	Samoyed	DREAMER IISAM38610	2005-12-30	M	43873	2005-09-15	2005-12-01	Medium	4.14	1	579
3760	BAXTER	CSH	Chihuahua	BAXTERCSH38610	2006-02-25	M	44188	2005-09-15	2006-01-28	Toy	4.98	1	580
9707	SUMO	BOX	Boxer	SUMOBOX38610	2006-05-22	M	44214	2005-09-15	2006-04-21	Large	4.14	1	581
12774	COCO	MIX	Mix	COCOMIX38610	2006-07-11	F	44911	2005-09-15	2006-02-14	.	2.62	1	582
4547	SPIKE	ESK	American Eskimo	SPIKEESK38610	2006-03-08	M	45148	2005-09-15	2006-01-30	Medium	4.14	1	583
6421	ARTHUR	BOX	Boxer	ARTHURBOX38611	2006-04-04	M	40731	2005-09-16	2006-01-10	Large	0.29	0	584
15143	RED RUBY	NOR	Norfolk Terrier	RED RUBYNOR38611	2006-07-29	F	47261	2005-09-16	2006-04-13	Small	3.45	1	585
8884	BOSS GOTTI	PRES	Presa	BOSS GOTTIPRES38613	2006-05-10	M	42943	2005-09-18	2006-01-15	.	3.45	1	586
14562	MOCHI	PUG	Pug	MOCHIPUG38613	2006-08-09	M	47040	2005-09-18	2006-07-14	Small	2.76	1	587
11045	LUKE	GER	German Shepard	LUKEGER38614	2006-06-11	M	26937	2005-09-19	2006-05-21	Large	2.76	1	588
6290	FRANKIE	CSH	Chihuahua	FRANKIECSH38614	2006-04-03	M	40845	2005-09-19	2006-01-18	Toy	4.14	1	589
9101	IRIE	BUL	Bull Terrier	IRIEBUL38614	2006-05-15	F	43629	2005-09-19	2006-04-26	Large	4.98	1	590
13123	QUINN	GDS	Gordon Setter	QUINNGDS38615	2006-07-03	M	11305	2005-09-20	2006-07-03	Large	0.38	0	591
4904	TONY	YRK	Yorkshire Terrier	TONYYRK38615	2006-03-13	M	14589	2005-09-20	2006-02-16	Toy	4.14	1	592
9801	UP TOWN GIRL	SPI	Shar-pei	UP TOWN GIRLSPI38615	2006-05-23	F	26784	2005-09-20	2006-03-24	Medium	4.14	1	593
11493	MADDIE	ABD	Bulldog	MADDIEABD38615	2006-06-15	F	41566	2005-09-20	2005-12-20	Large	3.45	1	594
6078	JIG	BOR	Border Collie	JIGBOR38615	2006-03-29	F	42472	2005-09-20	2006-02-06	Medium	0.66	1	595
692	DUDE	DSM	Dachshund	DUDEDSM38615	2006-01-05	M	43164	2005-09-20	2005-12-16	Small	2.62	1	596
10639	CHEWY	YRK	Yorkshire Terrier	CHEWYYRK38615	2006-06-06	M	46487	2005-09-20	2006-05-16	Toy	4.14	1	597
3483	JULIET	SFT	Fox Terrier	JULIETSFT38616	2006-02-20	F	9377	2005-09-21	2005-12-21	Small	0.29	0	598
4734	JUSTY	SFT	Fox Terrier	JUSTYSFT38616	2006-01-24	F	25345	2005-09-21	2005-12-21	Small	0.29	0	599
9994	HOKU	GLD	Golden Retriever	HOKUGLD38616	2006-05-30	F	41604	2005-09-21	2006-01-15	Large	0.07	0	600
1740	TEDDY	SHT	Shetland Sheepdog	TEDDYSHT38617	2006-01-30	M	9928	2005-09-22	2006-01-11	Small	2.62	1	601
15021	WICKET	BOR	Border Collie	WICKETBOR38617	2006-08-15	M	42065	2005-09-22	2006-02-02	Medium	2.17	1	602
16844	OLIVER	DSM	Dachshund	OLIVERDSM38617	2006-09-18	M	42577	2005-09-22	2006-03-22	Small	1.15	1	603
2545	MAO MAO	BOX	Boxer	MAO MAOBOX38617	2006-02-09	M	42587	2005-09-22	2006-01-04	Large	1.15	1	604
6356	MOCHI	SPO	Standard Poodle	MOCHISPO38617	2006-04-03	F	42866	2005-09-22	2006-02-04	Large	2.17	1	605
4787	GRACE	GER	German Shepard	GRACEGER38617	2006-03-13	F	44340	2005-09-22	2006-01-09	Large	0.87	1	606
13436	BAILEY	BIC	Bichon Frise	BAILEYBIC38618	2006-07-18	M	16752	2005-09-23	2006-04-04	Small	2.76	1	607
4040	BONNIE	AUS	Australian Terrier	BONNIEAUS38618	2006-02-27	F	36721	2005-09-23	2006-01-03	Toy	3.45	1	608
2104	WOODY			WOODY38618	2006-02-04	M	42285	2005-09-23	2006-01-07	.	3.45	1	609
10646	MIMI	MLT	Maltese	MIMIMLT38618	2006-06-06	F	45687	2005-09-23	2006-05-21	Toy	0.87	1	610
17227	DAISY	MIX	Mix	DAISYMIX38619	2006-09-21	F	23961	2005-09-24	2006-09-18	.	0.5	1	611
7544	FLAKES	ACD	Australian Cattle Dog	FLAKESACD38620	2006-04-21	M	10916	2005-09-25	2006-03-17	Medium	1.75	1	612
2149	KUMA	SBA	Shiba-inu	KUMASBA38620	2006-02-04	M	43348	2005-09-25	2006-01-06	Small	3.45	1	613
1789	PUPPY #1	ANA	Anatolian Shepard	PUPPY #1ANA38620	2006-01-27	M	43538	2005-09-25	2005-12-22	giant	1.51	1	614
1789	PUPPY #2	ANA	Anatolian Shepard	PUPPY #2ANA38620	2006-01-27	F	43860	2005-09-25	2005-12-22	giant	1.51	1	615
8501	BIRDIE	MIX	Mix	BIRDIEMIX38621	2006-05-05	M	12178	2005-09-26	2006-02-09	.	0.87	1	616
3365	LUCY	DSM	Dachshund	LUCYDSM38621	2006-02-21	F	15966	2005-09-26	2006-01-18	Small	4.14	1	617
9557	CLOONEY	DSC	Dachshund	CLOONEYDSC38621	2006-05-22	M	23819	2005-09-26	2006-04-28	Small	4.98	1	618
3140	RAMBO	CSH	Chihuahua	RAMBOCSH38621	2006-02-17	M	45176	2005-09-26	2006-01-27	Toy	1.99	1	619
12619	JAZMINE	MIX	Mix	JAZMINEMIX38621	2006-07-01	F	47907	2005-09-26	2006-05-26	.	4.14	1	620
12239	OSCAR	DCW	Dachshund	OSCARDCW38622	2006-06-28	M	18092	2005-09-27	2006-01-23	Small	0.05	0	621
3180	RUFUS	CHW	Chow Chow	RUFUSCHW38622	2006-02-17	M	40150	2005-09-27	2005-12-28	Medium	4.14	1	622
9559	BEECREEK	NEW	Newfoundland	BEECREEKNEW38622	2006-05-20	M	41753	2005-09-27	2006-04-17	giant	3.46	1	623
3659	FINN	TPO	Toy Poodle	FINNTPO38622	2006-02-14	F	44969	2005-09-27	2006-01-12	Toy	1.51	1	624
11234	SINSEI	PIT	Pitbull Terrier	SINSEIPIT38622	2006-06-16	M	46729	2005-09-27	2006-03-03	Medium	3.45	1	625
3558	FRED	MIX	Mix	FREDMIX38623	2006-02-25	M	42858	2005-09-28	2006-01-20	.	3.45	1	626
13078	DULCE	MIX	Mix	DULCEMIX38623	2006-07-13	F	47042	2005-09-28	2006-02-11	.	4.14	1	627
7785	LORD BYRON	BIC	Bichon Frise	LORD BYRONBIC38624	2006-04-19	M	42475	2005-09-29	2006-02-11	Small	1.75	1	628
2995	TOFFEE	YRK	Yorkshire Terrier	TOFFEEYRK38624	2006-02-15	M	45589	2005-09-29	2006-01-25	Toy	2.76	1	629
2672	KATANA	ARG	Argentine Dogo	KATANAARG38625	2006-02-11	M	6608	2005-09-30	2006-01-11	Large	4.98	1	630
11929	MAX	GER	German Shepard	MAXGER38625	2006-06-20	M	43740	2005-09-30	2006-01-12	Large	3.45	1	631
10278	BUSTER	CSH	Chihuahua	BUSTERCSH38625	2006-06-01	M	66585	2005-09-30	2006-03-15	Toy	3.45	1	632
12730	SADIE	GER	German Shepard	SADIEGER38626	2006-07-07	F	42514	2005-10-01	2006-04-05	Large	1.99	1	633
11861	NUI	SPO	Standard Poodle	NUISPO38626	2006-06-24	F	43928	2005-10-01	2006-06-10	Large	3.45	1	634
6645	BARLEY	LAB	Labrador Retriever	BARLEYLAB38626	2006-04-05	F	44391	2005-10-01	2005-11-14	Large	3.46	1	635
9281	SUNSCAPE	JRT	Jack Russell Terrier	SUNSCAPEJRT38627	2006-05-16	M	15628	2005-10-02	2006-03-13	Small	0.38	0	636
3659	NEIMAN BARCUS	TPO	Toy Poodle	NEIMAN BARCUSTPO38627	2006-02-14	M	45246	2005-10-02	2006-01-12	Toy	4.98	1	637
3322	KUMA	GER	German Shepard	KUMAGER38627	2006-02-17	F	45577	2005-10-02	2006-01-27	Large	3.45	1	638
14024	WILLOUGHBY	GLD	Golden Retriever	WILLOUGHBYGLD38628	2006-07-31	M	31690	2005-10-03	2006-07-04	Large	2.17	1	639
6517	WINCHESTER	LAB	Labrador Retriever	WINCHESTERLAB38628	2006-04-06	F	44205	2005-10-03	2006-01-31	Large	1.15	1	640
11804	ALI	ALM	Siberian Husky	ALIALM38628	2006-06-16	F	66571	2005-10-03	2005-12-30	Medium	3.45	1	641
14198	LOE	JRT	Jack Russell Terrier	LOEJRT38629	2006-08-01	M	16067	2005-10-04	2006-07-15	Small	4.98	1	642
15845	ELLIE	BOR	Border Collie	ELLIEBOR38629	2006-08-25	F	49365	2005-10-04	2006-01-17	Medium	3.45	1	643
17160	LITLIH	NEH	Norwegian Elk Hound	LITLIHNEH38629	2006-09-19	F	64661	2005-10-04	2006-03-13	Medium	0.66	1	644
2147	KARRI	MAL	Alaskan Malamute	KARRIMAL38630	2006-02-06	F	14487	2005-10-05	2006-01-05	Large	1.51	1	645
9281	WILMA	BEA	Beagle	WILMABEA38630	2006-05-16	F	15583	2005-10-05	2006-03-13	Small	1.15	1	646
9461	OCEAN	CSH	Chihuahua	OCEANCSH38630	2006-05-17	M	27900	2005-10-05	2006-01-17	Toy	1.15	1	647
2505	YASMIN OF CAPRICE	YRK	Yorkshire Terrier	YASMIN OF CAPRICEYRK38630	2006-02-05	F	65796	2005-10-05	2006-01-05	Toy	3.45	1	648
3214	CLEOPATRA	WES	West Highland Terrier	CLEOPATRAWES38631	2006-02-17	F	14475	2005-10-06	2006-01-26	Small	4.14	1	649
4490	DALI	DAL	Dalmatian	DALIDAL38631	2006-03-03	M	40416	2005-10-06	2006-01-24	Medium	1.51	1	650
2981	CHARLIE	TPO	Toy Poodle	CHARLIETPO38631	2006-02-16	M	42672	2005-10-06	2006-01-16	Toy	2.76	1	651
18109	PAMUK			PAMUK38631	2006-10-05	F	77759	2005-10-06	2006-01-30	.	3.45	1	652
17882	PARAY'S TRES BEAU	BIC	Bichon Frise	PARAY'S TRES BEAUBIC38632	2006-09-29	M	48031	2005-10-07	2006-07-21	Small	1.51	1	653
4494	GRACIE J	NEW	Newfoundland	GRACIE JNEW38632	2006-03-02	F	66713	2005-10-07	2006-02-05	giant	4.14	1	654
7634	POPPY			POPPY38632	2006-04-24	F	68917	2005-10-07	2006-03-24	.	1.75	1	655
7013	LOLA BEATRIX			LOLA BEATRIX38633	2006-04-13	F	22964	2005-10-08	2006-02-06	.	0.87	1	656
8975	EMMA	WES	West Highland Terrier	EMMAWES38633	2006-05-12	F	45425	2005-10-08	2006-04-20	Small	4.14	1	657
8975	JAMIE	WES	West Highland Terrier	JAMIEWES38633	2006-05-12	M	46809	2005-10-08	2006-04-20	Small	4.14	1	658
13735	MONTE	BOX	Boxer	MONTEBOX38634	2006-07-25	M	44894	2005-10-09	2006-05-30	Large	2.17	1	659
12673	COCO	CSH	Chihuahua	COCOCSH38634	2006-07-08	M	48296	2005-10-09	2006-03-28	Toy	1.99	1	660
12672	FOXY	CSH	Chihuahua	FOXYCSH38634	2006-07-08	M	48738	2005-10-09	2006-03-28	Toy	1.99	1	661
2023	GENIE	POM	Pomeranian	GENIEPOM38635	2006-01-31	F	42276	2005-10-10	2006-01-10	Toy	4.98	1	662
9606	CHESTER			CHESTER38635	2006-05-22	M	43604	2005-10-10	2006-01-21	.	0.66	1	663
4022	WINSTON	EBD	English Bulldog	WINSTONEBD38635	2006-03-01	M	44358	2005-10-10	2006-02-21	Medium	3.45	1	664
17631	RHEA			RHEA38635	2006-09-29	F	47302	2005-10-10	2006-08-21	.	2.17	1	665
10081	CHARLIE	WES	West Highland Terrier	CHARLIEWES38635	2006-03-25	M	65798	2005-10-10	2006-01-30	Small	4.14	1	666
6607	QUNICY	MIX	Mix	QUNICYMIX38636	2006-04-05	M	17918	2005-10-11	2006-01-31	.	2.62	1	667
6192	BEATLE	YRK	Yorkshire Terrier	BEATLEYRK38636	2006-04-03	F	27749	2005-10-11	2006-03-02	Toy	4.98	1	668
10446	NELSON	SPI	Shar-pei	NELSONSPI38636	2006-06-02	M	44019	2005-10-11	2006-01-24	Medium	0.87	1	669
10492	LAYLA	YRK	Yorkshire Terrier	LAYLAYRK38636	2006-06-02	F	67664	2005-10-11	2006-01-31	Toy	0.5	1	670
4561	SPARKLE GIRL	FBD	French Bulldog	SPARKLE GIRLFBD38637	2006-03-09	F	41568	2005-10-12	2006-01-23	Small	4.14	1	671
12234	POWDER	BIC	Bichon Frise	POWDERBIC38638	2006-06-29	F	10710	2005-10-13	2006-02-06	Small	2.76	1	672
13073	MELE	SHI	Shih-tzu	MELESHI38639	2006-07-12	F	23805	2005-10-14	2006-06-24	Small	4.14	1	673
6049	EMBRY	JAV	Japanese Chin	EMBRYJAV38639	2006-03-29	M	24426	2005-10-14	2006-02-09	Toy	0.66	1	674
3917	PAZ	GER	German Shepard	PAZGER38639	2006-02-28	F	42291	2005-10-14	2006-02-08	Large	0.87	1	675
13764	HACHI	YRK	Yorkshire Terrier	HACHIYRK38639	2006-07-14	M	47433	2005-10-14	2006-07-07	Toy	2.17	1	676
18206	BLUE RIVERS J TAYLER	LAB	Labrador Retriever	BLUE RIVERS J TAYLERLAB38640	2006-10-11	M	12773	2005-10-15	2006-06-29	Large	0.87	1	677
6222	MISO	LAB	Labrador Retriever	MISOLAB38640	2006-04-01	F	15799	2005-10-15	2006-03-18	Large	0.22	0	678
12268	BETHOVEN			BETHOVEN38640	2006-06-26	M	16711	2005-10-15	2006-03-15	.	2.76	1	679
9769	SKYLAR	STO	Standard Poodle	SKYLARSTO38640	2006-05-18	M	17556	2005-10-15	2006-04-28	Large	4.14	1	680
9382	TIA	MIX	Mix	TIAMIX38640	2006-05-09	F	19444	2005-10-15	2006-03-13	.	1.51	1	681
9382	FFION	MIX	Mix	FFIONMIX38640	2006-05-09	F	19451	2005-10-15	2006-03-13	.	1.99	1	682
15400	MADDIE	BOR	Border Collie	MADDIEBOR38640	2006-08-19	F	21977	2005-10-15	2006-07-15	Medium	6.4	1	683
14231	SANFORD	MIX	Mix	SANFORDMIX38640	2006-08-01	M	41057	2005-10-15	2006-05-31	.	4.98	1	684
3098	PUP 2	PUG	Pug	PUP 2PUG38640	2006-02-17	M	41677	2005-10-15	2006-01-17	Small	3.45	1	685
3098	PUP 1	PUG	Pug	PUP 1PUG38640	2006-02-17	F	43326	2005-10-15	2006-01-17	Small	3.45	1	686
12128	CINNEMION	SAL	Saluki	CINNEMIONSAL38640	2006-06-28	F	46890	2005-10-15	2006-05-27	Large	3.45	1	687
16722	SPIKE	JRT	Jack Russell Terrier	SPIKEJRT38640	2006-09-13	M	46993	2005-10-15	2006-08-04	Small	4.14	1	688
6622	GINA			GINA38640	2006-04-05	M	65769	2005-10-15	2006-01-15	.	0.22	0	689
7483	GUNNY	EBD	English Bulldog	GUNNYEBD38641	2006-04-19	M	10373	2005-10-16	2006-02-18	Medium	0.38	0	691
12940	CCH	ASI	Australian Shepard	CCHASI38641	2006-07-11	M	10682	2005-10-16	2006-06-01	Medium	4.14	1	692
5630	ABBEY	SHI	Shih-tzu	ABBEYSHI38641	2006-03-16	F	40877	2005-10-16	2006-02-06	Small	1.99	1	693
4290	TEX	LAB	Labrador Retriever	TEXLAB38642	2006-03-01	M	27187	2005-10-17	2006-01-25	Large	0.87	1	694
17114	MR. PEKES	PEK	Pekingese	MR. PEKESPEK38642	2006-09-20	M	43722	2005-10-17	2006-03-21	Toy	0.13	0	695
16760	KEYRA	GER	German Shepard	KEYRAGER38642	2006-09-15	F	43886	2005-10-17	2006-03-22	Large	0.66	1	696
3659	BULLET	TPO	Toy Poodle	BULLETTPO38642	2006-02-14	M	43933	2005-10-17	2006-01-12	Toy	4.98	1	697
3659	GRACE	TPO	Toy Poodle	GRACETPO38642	2006-02-14	F	44872	2005-10-17	2006-01-12	Toy	4.98	1	698
4325	MOLLY	LAB	Labrador Retriever	MOLLYLAB38642	2006-03-07	F	45356	2005-10-17	2006-02-03	Large	1.51	1	699
3659	BETTY	TPO	Toy Poodle	BETTYTPO38642	2006-02-14	F	45372	2005-10-17	2006-01-12	Toy	0.1	0	700
6787	CRISTY	GRT	Great Dane	CRISTYGRT38643	2006-04-10	F	18065	2005-10-18	2006-03-21	giant	4.14	1	701
4752	SWEET PEA	CHI	Chihuahua	SWEET PEACHI38643	2006-03-13	F	25841	2005-10-18	2006-02-10	Toy	3.45	1	702
16016	CHARLIE	CHN	Japanese Chin	CHARLIECHN38643	2006-09-01	M	44737	2005-10-18	2006-03-06	Toy	4.14	1	703
5720	PEBBLES PACER	MIN	Miniature Pinscher	PEBBLES PACERMIN38644	2006-03-27	F	15724	2005-10-19	2006-02-24	Toy	4.14	1	704
4314	LITTLE CREEK'S AMERICAN CANINE	AST	Staffordshire Bull Terrier	LITTLE CREEK'S AMERICAN CANINEAST38644	2006-03-06	M	16777	2005-10-19	2006-01-20	Medium	1.15	1	705
14955	MURPHY	EBD	English Bulldog	MURPHYEBD38644	2006-08-15	M	41946	2005-10-19	2006-02-11	Medium	0.38	0	707
7092	PIPER	MIX	Mix	PIPERMIX38644	2006-04-11	F	64087	2005-10-19	2006-03-21	.	4.14	1	708
4247	ZEUS	ABD	Bulldog	ZEUSABD38644	2006-02-24	M	77714	2005-10-19	2006-01-15	Large	2.17	1	709
8968	ZOEY	MAS	Mastiff	ZOEYMAS38645	2006-05-11	F	10854	2005-10-20	2006-05-02	giant	4.14	1	710
5368	TAILOR MADE FOR YAMA	CHN	Japanese Chin	TAILOR MADE FOR YAMACHN38645	2006-03-21	M	16328	2005-10-20	2006-02-28	Toy	4.14	1	711
13450	MERLIN	CLS	Collie	MERLINCLS38645	2006-07-20	M	22731	2005-10-20	2006-06-30	Large	2.76	1	712
13450	SHAN	CLS	Collie	SHANCLS38645	2006-07-20	M	22735	2005-10-20	2006-06-30	Large	2.76	1	713
13920	PUMPKIN	PUG	Pug	PUMPKINPUG38645	2006-07-28	M	48005	2005-10-20	2006-06-24	Small	2.17	1	714
5209	PHANTOM	ECS	Cocker Spaniel	PHANTOMECS38646	2006-03-13	M	41413	2005-10-21	2006-01-27	Small	1.51	1	715
12317	REMY	SIB	Siberian Husky	REMYSIB38646	2006-06-30	M	43453	2005-10-21	2006-05-15	Medium	2.62	1	716
11810	LISA			LISA38646	2006-06-22	F	44196	2005-10-21	2006-03-20	.	0.66	1	717
17724	GUINNESS	MIX	Mix	GUINNESSMIX38646	2006-10-02	M	66024	2005-10-21	2006-03-01	.	0.38	0	718
18123	CHILLY	MIX	Mix	CHILLYMIX38646	2006-10-05	F	66673	2005-10-21	2006-09-14	.	3.45	1	719
10339	OSCAR	DSM	Dachshund	OSCARDSM38647	2006-06-03	M	16186	2005-10-22	2006-04-10	Small	4.14	1	720
8305	ROXY	CSH	Chihuahua	ROXYCSH38647	2006-04-21	F	18602	2005-10-22	2006-03-01	Toy	4.98	1	721
2254	ALABAMA	LAB	Labrador Retriever	ALABAMALAB38647	2006-02-03	F	25805	2005-10-22	2006-01-20	Large	2.62	1	722
10689	JULIAN	COTON DETULEAR	Coton de Tuleire	JULIANCOTON DETULEAR38647	2006-06-07	M	44767	2005-10-22	2006-05-24	Small	4.14	1	723
11264	LOCKRY	SCHNAUZER	Schnauzer	LOCKRYSCHNAUZER38647	2006-06-10	F	46715	2005-10-22	2006-05-06	Medium	3.45	1	724
3937	DAMIEN	CHIN	Japanese Chin	DAMIENCHIN38648	2006-02-28	M	14428	2005-10-23	2006-02-07	Toy	3.45	1	725
13057	RUBY	GLD	Golden Retriever	RUBYGLD38648	2006-07-06	F	67564	2005-10-23	2006-06-06	Large	1.99	1	726
3020	EDEN	MIX	Mix	EDENMIX38649	2006-02-16	F	27244	2005-10-24	2006-01-11	.	2.76	1	727
6031	VALA			VALA38649	2006-03-30	F	40786	2005-10-24	2006-03-14	.	0.87	1	728
17620	BUDDY	BOX	Boxer	BUDDYBOX38649	2006-09-29	M	41129	2005-10-24	2006-08-31	Large	2.17	1	729
9789	WILBUR	PUG	Pug	WILBURPUG38649	2006-05-24	M	41538	2005-10-24	2006-02-18	Small	0.38	0	730
3972	COCOA	CSH	Chihuahua	COCOACSH38650	2006-02-28	F	42576	2005-10-25	2006-01-26	Toy	3.45	1	732
3849	WALTER	MLT	Maltese	WALTERMLT38650	2006-02-25	M	45205	2005-10-25	2006-01-28	Toy	4.98	1	733
15511	MOLLY	COC	Cocker Spaniel	MOLLYCOC38650	2006-08-24	F	46405	2005-10-25	2006-04-18	Small	1.15	1	734
5355	STAR	AUS	Australian Terrier	STARAUS38650	2006-03-21	M	71470	2005-10-25	2006-02-28	Toy	4.14	1	735
5355	BOOGIE	AUS	Australian Terrier	BOOGIEAUS38650	2006-03-21	F	71471	2005-10-25	2006-02-28	Toy	4.14	1	736
8497	CHARLIE			CHARLIE38651	2006-05-04	M	16470	2005-10-26	2006-04-08	.	3.45	1	737
10054	NOEL	BRS	Brussels Griffon	NOELBRS38651	2006-05-30	M	18818	2005-10-26	2006-04-27	Toy	0.87	1	738
14114	HANSA	AFG	Afghan Hound	HANSAAFG38651	2006-07-31	M	40275	2005-10-26	2005-11-22	Large	2.62	1	739
9806	KOKE	MIS	Miniature Schnauzer	KOKEMIS38652	2006-05-23	M	16171	2005-10-27	2006-05-02	Small	3.45	1	740
14876	CASANOVA	MIS	Miniature Schnauzer	CASANOVAMIS38652	2006-08-14	M	26641	2005-10-27	2006-04-13	Small	0.13	0	741
6192	SMUDGE	YRK	Yorkshire Terrier	SMUDGEYRK38652	2006-04-03	M	28459	2005-10-27	2006-03-02	Toy	4.98	1	742
11815	YAKI	MIN	Miniature Pinscher	YAKIMIN38652	2006-06-25	F	33773	2005-10-27	2006-05-24	Toy	3.45	1	743
11815	MOCHI	MIN	Miniature Pinscher	MOCHIMIN38652	2006-06-25	M	33887	2005-10-27	2006-05-24	Toy	3.45	1	744
2396	BENSON	BER	Bernese Mountain Dog	BENSONBER38652	2006-02-06	M	43560	2005-10-27	2006-01-05	Large	1.51	1	745
3449	LEILANI	ASI	Australian Shepard	LEILANIASI38652	2006-02-21	F	44138	2005-10-27	2006-01-20	Medium	4.14	1	746
11101	MAC FLY	MIX	Mix	MAC FLYMIX38653	2006-06-12	M	163	2005-10-28	2006-05-01	.	0.07	0	747
5981	MEG	LAB	Labrador Retriever	MEGLAB38653	2006-03-27	F	12821	2005-10-28	2006-02-28	Large	1.15	1	748
18531	BARKLEY	NEW	Newfoundland	BARKLEYNEW38653	2006-10-18	M	71485	2005-10-28	2006-09-16	giant	3.45	1	749
7192	ROCKY	MIS	Miniature Schnauzer	ROCKYMIS38655	2006-04-17	M	27197	2005-10-30	2006-03-20	Small	4.14	1	750
4327	COCO	SPO	Standard Poodle	COCOSPO38655	2006-03-06	F	78850	2005-10-30	2006-02-09	Large	1.99	1	751
12570	BODIE	SHI	Shih-tzu	BODIESHI38656	2006-07-06	M	25766	2005-10-31	2006-06-12	Small	0.87	1	752
17074	SKYLAR	COC	Cocker Spaniel	SKYLARCOC38656	2006-09-21	F	48162	2005-10-31	2006-08-30	Small	4.14	1	753
7394	ANGIE	HAV	Havanese	ANGIEHAV38657	2006-04-18	F	9513	2005-11-01	2006-03-27	Toy	3.45	1	754
11212	BEBE	LAB	Labrador Retriever	BEBELAB38657	2006-06-09	F	11852	2005-11-01	2006-03-04	Large	1.15	1	755
9820	SOBA	SPO	Standard Poodle	SOBASPO38657	2006-05-23	F	13220	2005-11-01	2006-04-03	Large	3.45	1	756
9820	NELL	SPO	Standard Poodle	NELLSPO38657	2006-05-23	F	13247	2005-11-01	2006-04-03	Large	1.99	1	757
16165	LEROY	BOS	Boston Terrier	LEROYBOS38657	2006-08-31	M	18353	2005-11-01	2006-07-31	Small	3.45	1	758
8555	SPUD	RAT TERRIER	Rat Terrier	SPUDRAT TERRIER38657	2006-05-05	M	18656	2005-11-01	2006-04-13	Small	3.45	1	759
18963	WAGGY	MIX	Mix	WAGGYMIX38657	2006-10-25	M	26559	2005-11-01	2006-09-21	.	3.45	1	760
17901	ROSIE	SHI	Shih-tzu	ROSIESHI38657	2006-10-03	F	45216	2005-11-01	2006-06-28	Small	4.98	1	761
11348	MILLIE	MIX	Mix	MILLIEMIX38657	2006-06-19	F	45395	2005-11-01	2006-05-16	.	2.17	1	762
7541	BROOKE	YRK	Yorkshire Terrier	BROOKEYRK38657	2006-04-19	F	64055	2005-11-01	2006-03-16	Toy	1.75	1	763
10479	BELLA	BEA	Beagle	BELLABEA38657	2006-06-02	F	86837	2005-11-01	2006-02-02	Small	0.29	0	764
19324	LULU	DSC	Dachshund	LULUDSC38658	2006-10-31	F	10244	2005-11-02	2006-04-10	Small	3.45	1	765
7128	SALONI OF SARAS	TIB	Tibetan Terrier	SALONI OF SARASTIB38658	2006-04-17	F	41564	2005-11-02	2006-03-18	Medium	2.62	1	766
14498	GRACIE	YRK	Yorkshire Terrier	GRACIEYRK38658	2006-08-02	F	45803	2005-11-02	2006-06-20	Toy	0.38	0	767
7192	JINGLES	MLT	Maltese	JINGLESMLT38659	2006-04-17	M	27007	2005-11-03	2006-03-20	Toy	4.14	1	768
12271	ANGIE	GLD	Golden Retriever	ANGIEGLD38659	2006-06-29	F	67582	2005-11-03	2006-04-28	Large	0.87	1	769
7219	RUBIC	VIZ	Vizsla	RUBICVIZ38660	2006-04-10	M	17653	2005-11-04	2006-02-15	Large	3.45	1	770
7128	TIGRESS OF SARAS	TIB	Tibetan Terrier	TIGRESS OF SARASTIB38660	2006-04-17	F	43983	2005-11-04	2006-03-18	Medium	4.14	1	771
10379	MOCHI	ESK	American Eskimo	MOCHIESK38660	2006-06-02		46575	2005-11-04	2006-04-14	Medium	4.14	1	772
17962	EMILY	COC	Cocker Spaniel	EMILYCOC38660	2006-10-02	F	62746	2005-11-04	2006-02-15	Small	0.66	1	773
3708	POM-PON	ASI	Australian Shepard	POM-PONASI38661	2006-02-24	F	35590	2005-11-05	2006-02-03	Medium	4.98	1	774
17427	FRECKLES	MIX	Mix	FRECKLESMIX38661	2006-09-27	F	46516	2005-11-05	2006-09-05	.	4.98	1	775
17448	FLURRY	JRT	Jack Russell Terrier	FLURRYJRT38662	2006-09-27	F	21982	2005-11-06	2006-08-31	Small	2.17	1	776
7322	JOY	DCW	Dachshund	JOYDCW38662	2006-04-11	F	23612	2005-11-06	2006-03-02	Small	0.13	0	777
13299	TAHNE			TAHNE38662	2006-07-18	M	66836	2005-11-06	2006-06-21	.	3.45	1	778
8392	PENNY	GLD	Golden Retriever	PENNYGLD38663	2006-05-02	F	26840	2005-11-07	2006-03-03	Large	3.45	1	779
12384	SUGAREE	DCW	Dachshund	SUGAREEDCW38663	2006-07-01	F	45283	2005-11-07	2006-02-18	Small	4.98	1	780
8625	NERO	ITI	Italian Grey Hound	NEROITI38663	2006-05-05	M	47368	2005-11-07	2006-02-16	Toy	0.17	0	781
3512	RILEY	EST	English Setter	RILEYEST38664	2006-02-22	M	40538	2005-11-08	2006-02-07	Large	1.99	1	782
4936	SAVY	ROT	Rottweiler	SAVYROT38664	2006-03-13	F	45982	2005-11-08	2006-02-14	giant	0.66	1	783
18761	CLYDE	BAS	Basset Hound	CLYDEBAS38665	2006-10-20	M	19061	2005-11-09	2006-09-18	Small	2.76	1	784
13381	ALFI	SHI	Shih-tzu	ALFISHI38665	2006-07-20	M	44611	2005-11-09	2006-06-29	Small	3.45	1	785
12454	SAMANTA			SAMANTA38666	2006-07-05	F	41284	2005-11-10	2006-02-23	.	2.62	1	786
10511	TUCKER	YRK	Yorkshire Terrier	TUCKERYRK38666	2006-06-02	M	46109	2005-11-10	2006-04-01	Toy	3.45	1	787
11880	CHRONIC	MIX	Mix	CHRONICMIX38667	2006-06-22	M	21919	2005-11-11	2006-05-30	.	1.15	1	788
7878	JACKSON	JRT	Jack Russell Terrier	JACKSONJRT38667	2006-04-25	M	43102	2005-11-11	2006-02-20	Small	2.76	1	789
14542	RAIN	LAB	Labrador Retriever	RAINLAB38667	2006-08-04	M	68958	2005-11-11	2006-02-18	Large	1.15	1	790
17089	SWSEAS WINDWARD	PWD	Portugese Water Dog	SWSEAS WINDWARDPWD38668	2006-09-18	M	18763	2005-11-12	2006-08-11	Medium	2.76	1	791
9955	DEEDEE	MIX	Mix	DEEDEEMIX38668	2006-05-25	F	23207	2005-11-12	2006-02-17	.	1.15	1	792
17851	MAX	MIX	Mix	MAXMIX38668	2006-10-03	M	47377	2005-11-12	2006-03-09	.	0.5	1	793
5523	JUDGE	BUL	Bull Terrier	JUDGEBUL38668	2006-03-23	F	68932	2005-11-12	2006-02-24	Large	1.99	1	794
5523	DIAMOND	BUL	Bull Terrier	DIAMONDBUL38668	2006-03-23	F	68935	2005-11-12	2006-02-24	Large	4.14	1	795
7256	FAYE	DOB	Doberman Pinscher	FAYEDOB38669	2006-04-18	F	15619	2005-11-13	2006-03-30	Large	3.45	1	796
13441	BRUTIS	BOX	Boxer	BRUTISBOX38669	2006-07-19	M	19423	2005-11-13	2006-05-26	Large	2.76	1	797
18760	POLLY	BAS	Basset Hound	POLLYBAS38669	2006-10-20	F	42769	2005-11-13	2006-09-19	Small	2.76	1	798
12231	CHANDLER	DCW	Dachshund	CHANDLERDCW38669	2006-06-30	M	46822	2005-11-13	2006-06-15	Small	2.76	1	799
6132	MILOU	GER	German Shepard	MILOUGER38670	2006-03-31	F	41189	2005-11-14	2006-03-06	Large	0.66	1	800
14011	KIYA	MIX	Mix	KIYAMIX38670	2006-07-31	F	46802	2005-11-14	2006-03-24	.	0.87	1	801
16839	DUNCAN	SPO	Standard Poodle	DUNCANSPO38671	2006-09-14	M	4121	2005-11-15	2006-08-22	Large	3.45	1	802
3567	BAILEY	DSM	Dachshund	BAILEYDSM38671	2006-02-23	M	9202	2005-11-15	2006-02-01	Small	3.45	1	803
3567	SUZY	DSM	Dachshund	SUZYDSM38671	2006-02-23	F	9209	2005-11-15	2006-02-01	Small	3.45	1	804
4771	LUCY	MIX	Mix	LUCYMIX38671	2006-03-10	F	12587	2005-11-15	2006-02-06	.	3.45	1	805
9692	BAILEY			BAILEY38671	2006-05-22	M	14607	2005-11-15	2006-04-10	.	4.14	1	806
7211	ZSA ZSA	SHI	Shih-tzu	ZSA ZSASHI38671	2006-04-08	F	15449	2005-11-15	2006-03-24	Small	3.45	1	807
12740	PETE	WEI	Weimaraner	PETEWEI38671	2006-07-10	F	16339	2005-11-15	2006-06-02	Large	2.62	1	808
7244	BOOMER	SHI	Shih-tzu	BOOMERSHI38671	2006-04-13	M	17913	2005-11-15	2006-03-29	Small	3.45	1	809
10637	CABO	GLD	Golden Retriever	CABOGLD38671	2006-06-06	M	18498	2005-11-15	2006-05-05	Large	4.14	1	810
10678	CAPERUZA			CAPERUZA38671	2006-06-03	F	18848	2005-11-15	2006-04-28	.	0.66	1	811
10280	TAILZ	LAB	Labrador Retriever	TAILZLAB38671	2006-05-31	M	21930	2005-11-15	2006-04-04	Large	3.45	1	812
17289	JEZEBEL	MIX	Mix	JEZEBELMIX38671	2006-09-26	F	28709	2005-11-15	2006-08-13	.	4.98	1	813
5894	LEIA	GLD	Golden Retriever	LEIAGLD38671	2006-03-28	F	78963	2005-11-15	2006-02-15	Large	0.5	1	814
5100	EMI PUPPY	SIB	Siberian Husky	EMI PUPPYSIB38672	2006-03-16	F	43585	2005-11-16	2006-02-16	Medium	0.87	1	815
17947	HARLEY	MAL	Alaskan Malamute	HARLEYMAL38672	2006-10-06	M	48549	2005-11-16	2006-09-05	Large	4.98	1	817
16728	AFFY	TPO	Toy Poodle	AFFYTPO38672	2006-09-14	M	49179	2005-11-16	2006-05-08	Toy	4.14	1	818
19780	PRINCESS	SHI	Shih-tzu	PRINCESSSHI38673	2006-11-08	F	12639	2005-11-17	2006-10-12	Small	2.62	1	819
19669	BABY	MON	Mix	BABYMON38673	2006-11-03	F	16215	2005-11-17	2006-09-08	.	0.87	1	820
8019	KIARA	SIB	Siberian Husky	KIARASIB38673	2006-04-11	F	40895	2005-11-17	2006-03-22	Medium	2.76	1	821
12549	LUCIE	KCS	King Charles Spaniel	LUCIEKCS38673	2006-07-06	F	45052	2005-11-17	2006-04-06	Toy	0.87	1	822
10251	CHESTER	COCKAPOO	Cockapoo	CHESTERCOCKAPOO38673	2006-06-01	M	47888	2005-11-17	2006-05-02	Small	3.45	1	823
7298	GLORY	PAP	Papillion	GLORYPAP38674	2006-04-11	F	17641	2005-11-18	2006-03-27	Toy	3.45	1	824
14230	CHELSEA	GLD	Golden Retriever	CHELSEAGLD38674	2006-08-03	F	42918	2005-11-18	2006-04-18	Large	0.5	1	825
18310	SASSY	POM	Pomeranian	SASSYPOM38674	2006-10-12	F	47005	2005-11-18	2006-09-18	Toy	2.17	1	826
8961	BABY	GER	German Shepard	BABYGER38674	2006-05-12	F	48051	2005-11-18	2006-04-11	Large	2.62	1	827
10720	PANDORA	BIC	Bichon Frise	PANDORABIC38675	2006-06-07	F	9019	2005-11-19	2006-04-17	Small	4.14	1	828
11749	WORTH THE WAIT	POM	Pomeranian	WORTH THE WAITPOM38675	2006-06-21	M	12534	2005-11-19	2006-05-19	Toy	3.45	1	829
5720	DINO BOMBER	MIN	Miniature Pinscher	DINO BOMBERMIN38675	2006-03-27	M	15651	2005-11-19	2006-02-24	Toy	4.14	1	830
8163	SAM	LABRADOODLE	Labrador Retriever	SAMLABRADOODLE38675	2006-04-27	M	24403	2005-11-19	2006-03-21	.	0.66	1	831
13679	WARRIOR	MAL	Alaskan Malamute	WARRIORMAL38675	2006-07-21	M	35967	2005-11-19	2006-06-22	Large	1.15	1	832
18968	NITTANY	MIX	Mix	NITTANYMIX38675	2006-10-23	M	36730	2005-11-19	2006-09-22	.	3.45	1	833
7378	PUP 1	PIT	Pitbull Terrier	PUP 1PIT38675	2006-04-19	F	41519	2005-11-19	2006-02-11	Medium	3.45	1	834
11940	TOBY	YRK	Yorkshire Terrier	TOBYYRK38675	2006-06-27	M	42261	2005-11-19	2006-05-15	Toy	3.45	1	835
7378	PUP 2	PIT	Pitbull Terrier	PUP 2PIT38675	2006-04-19	M	43611	2005-11-19	2006-02-11	Medium	3.45	1	836
15541	RUGER	BEA	Beagle	RUGERBEA38675	2006-08-25	M	43887	2005-11-19	2006-06-20	Small	2.76	1	837
11244	REX	DCW	Dachshund	REXDCW38675	2006-06-16	M	46349	2005-11-19	2006-03-02	Small	3.45	1	838
18854	SPIKE	COC	Cocker Spaniel	SPIKECOC38675	2006-10-23	M	49906	2005-11-19	2006-10-05	Small	2.76	1	839
16682	BENNY	GTS	Giant Schnauzer	BENNYGTS38676	2006-09-11	M	18081	2005-11-20	2006-04-03	Large	0.07	0	840
20323	TAZ	HSK	Husky	TAZHSK38676	2006-11-17	M	25674	2005-11-20	2006-03-18	Medium	0.03	0	842
8762	TIKUS	WES	West Highland Terrier	TIKUSWES38676	2006-05-09	M	42770	2005-11-20	2006-03-03	Small	4.14	1	843
8828	RANGER	GER	German Shepard	RANGERGER38676	2006-05-10	M	44812	2005-11-20	2006-04-10	Large	3.45	1	844
5932	BENBARON'S UNIQUE OF RATHLEAGUE	STB	St. Bernard	BENBARON'S UNIQUE OF RATHLEAGUESTB38676	2006-03-27	F	66743	2005-11-20	2006-02-25	giant	1.51	1	846
13652	B-BALL	POM	Pomeranian	B-BALLPOM38677	2006-07-24	M	25071	2005-11-21	2006-07-06	Toy	2.17	1	847
7150	SARA	DSM	Dachshund	SARADSM38677	2006-04-14	F	40076	2005-11-21	2006-03-15	Small	4.14	1	848
15576	JEFF	TPO	Toy Poodle	JEFFTPO38677	2006-08-23	M	43645	2005-11-21	2006-04-25	Toy	0.38	0	849
15576	MUTT	TPO	Toy Poodle	MUTTTPO38677	2006-08-23	M	44117	2005-11-21	2006-04-25	Toy	1.15	1	850
12920	GREER	SKY	Skye Terrier	GREERSKY38677	2006-07-11	F	44656	2005-11-21	2006-05-22	Small	4.14	1	851
11272	DUKE	BOX	Boxer	DUKEBOX38678	2006-06-15	M	16052	2005-11-22	2006-02-24	Large	0.38	0	852
9051	BAILEY	YRK	Yorkshire Terrier	BAILEYYRK38678	2006-05-15	M	41144	2005-11-22	2006-04-19	Toy	4.98	1	853
6708	TATAR TOT	LAB	Labrador Retriever	TATAR TOTLAB38678	2006-04-07	M	41777	2005-11-22	2006-03-24	Large	4.98	1	854
11203	BINGO	SHI	Shih-tzu	BINGOSHI38678	2006-06-14	F	43930	2005-11-22	2006-05-09	Small	3.45	1	855
19511	BETSY ROSS	BOS	Boston Terrier	BETSY ROSSBOS38678	2006-11-02	F	48590	2005-11-22	2006-07-26	Small	0.13	0	856
9162	MUFASA	CHW	Chow Chow	MUFASACHW38679	2006-05-15	M	26108	2005-11-23	2006-03-20	Medium	0.17	0	857
18592	SHAWME	HUS	Husky	SHAWMEHUS38679	2006-10-14	F	42279	2005-11-23	2006-09-22	Medium	0.87	1	859
11153	ARTHUR	PUG	Pug	ARTHURPUG38679	2006-06-14	M	44716	2005-11-23	2006-03-02	Small	1.51	1	860
20679	BELLA	BUL	Bull Terrier	BELLABUL38679	2006-11-22	F	45439	2005-11-23	2006-10-13	Large	4.98	1	861
6144	PUPPY #2	SPO	Standard Poodle	PUPPY #2SPO38680	2006-03-30	M	27239	2005-11-24	2006-02-27	Large	4.98	1	862
12013	SNAPS	TPO	Toy Poodle	SNAPSTPO38680	2006-06-27	M	27292	2005-11-24	2006-02-27	Toy	1.99	1	863
10154	CRITTER	MIX	Mix	CRITTERMIX38680	2006-05-30	M	44260	2005-11-24	2006-04-07	.	4.98	1	864
14528	CODY	LAB	Labrador Retriever	CODYLAB38681	2006-08-08	M	15338	2005-11-25	2006-07-03	Large	2.76	1	865
12037	RUBY	MIX	Mix	RUBYMIX38681	2006-06-28	F	34865	2005-11-25	2006-03-31	.	0.13	0	866
11640	KODA	GTS	Giant Schnauzer	KODAGTS38681	2006-06-21	M	41705	2005-11-25	2006-05-16	Large	4.14	1	867
6101	FRANKIE	CSH	Chihuahua	FRANKIECSH38681	2006-04-01	M	45072	2005-11-25	2006-03-15	Toy	1.51	1	868
6882	BEAULY	GLD	Golden Retriever	BEAULYGLD38681	2006-04-12	F	45211	2005-11-25	2006-03-16	Large	0.66	1	869
15726	YOJA	MIX	Mix	YOJAMIX38682	2006-08-24	F	19409	2005-11-26	2006-03-20	.	1.51	1	870
19716	KAIKA	FBD	French Bulldog	KAIKAFBD38682	2006-11-06	M	50420	2005-11-26	2006-09-23	Small	4.98	1	871
7951	KAYLA	LAB	Labrador Retriever	KAYLALAB38682	2006-04-24	F	66745	2005-11-26	2006-03-20	Large	2.76	1	872
11641	TARO	PUG	Pug	TAROPUG38683	2006-06-21	M	18856	2005-11-27	2006-05-21	Small	4.14	1	873
8101	RUUTU	MIX	Mix	RUUTUMIX38683	2006-04-28	M	77668	2005-11-27	2006-03-28	.	2.76	1	874
4997	ARLIS 2	MIX	Mix	ARLIS 2MIX38684	2006-03-15	M	14604	2005-11-28	2006-02-17	.	3.46	1	875
8320	SASHA			SASHA38684	2006-05-02	F	42433	2005-11-28	2006-03-14	.	1.51	1	876
15415	JOSEPH	SCT	Scottish Terrier	JOSEPHSCT38684	2006-08-23	M	48381	2005-11-28	2006-03-02	Small	1.99	1	877
10495	TOGA	PHA	Pharoah Hound	TOGAPHA38685	2006-05-22	M	22628	2005-11-29	2006-04-03	Large	3.45	1	878
7780	HONEY	SPO	Standard Poodle	HONEYSPO38685	2006-04-25	F	44084	2005-11-29	2006-04-11	Large	1.75	1	879
20578	TOBY	MLT	Maltese	TOBYMLT38687	2006-11-16	M	16243	2005-12-01	2006-08-10	Toy	0.29	0	880
12865	DALLAS	MIX	Mix	DALLASMIX38687	2006-06-20	M	42690	2005-12-01	2006-05-13	.	4.98	1	881
13736	KANE	DOB	Doberman Pinscher	KANEDOB38687	2006-07-24	M	44620	2005-12-01	2006-05-03	Large	1.15	1	883
12865	PENNY	MIX	Mix	PENNYMIX38687	2006-06-20	F	44879	2005-12-01	2006-05-11	.	0.29	0	884
14014	RALPHIE	CLR	Collie	RALPHIECLR38687	2006-07-28	M	47398	2005-12-01	2006-04-10	Large	0.87	1	885
15471	BLUE	JRT	Jack Russell Terrier	BLUEJRT38687	2006-08-19	M	48331	2005-12-01	2006-07-28	Small	2.76	1	886
14738	SILVER	MIS	Miniature Schnauzer	SILVERMIS38687	2006-08-04	M	49420	2005-12-01	2006-07-28	Small	0.38	0	887
15937	RUSSELL	JRT	Jack Russell Terrier	RUSSELLJRT38687	2006-09-01	M	50133	2005-12-01	2006-08-09	Small	3.45	1	888
13585	LOKI	WES	West Highland Terrier	LOKIWES38687	2006-07-18	M	64561	2005-12-01	2006-03-02	Small	0.29	0	889
8403	MOUSE	DCW	Dachshund	MOUSEDCW38688	2006-05-02	M	17451	2005-12-02	2006-04-04	Small	3.45	1	890
18991	MULLIGAN	LAB	Labrador Retriever	MULLIGANLAB38688	2006-10-24	M	19474	2005-12-02	2006-03-14	Large	0.29	0	891
20920	BEAUTY	BIC	Bichon Frise	BEAUTYBIC38688	2006-11-29	F	26097	2005-12-02	2006-02-28	Small	1.75	1	892
7503	POPPY	LAB	Labrador Retriever	POPPYLAB38688	2006-04-20	F	45823	2005-12-02	2006-03-14	Large	2.62	1	893
19155	MEGAN	MIX	Mix	MEGANMIX38688	2006-10-23	F	86812	2005-12-02	2006-10-13	.	4.98	1	894
15853	LOLA	WHP	Whippet	LOLAWHP38689	2006-08-30	F	26879	2005-12-03	2006-05-11	Medium	0.04	0	895
18475	LOLA	WHP	Whippet	LOLAWHP38689	2006-10-16	F	26889	2005-12-03	2006-09-28	Medium	3.45	1	896
16460	LUCKY	PIT	Pitbull Terrier	LUCKYPIT38689	2006-09-08	F	43476	2005-12-03	2006-08-01	Medium	2.76	1	897
13139	ARMANI	BRI	Briard	ARMANIBRI38689	2006-07-17	M	45302	2005-12-03	2006-03-17	Large	0.22	0	898
9779	RORY	WES	West Highland Terrier	RORYWES38689	2006-05-17	M	64043	2005-12-03	2006-03-18	Small	1.51	1	899
9779	NICKY-TAM	WES	West Highland Terrier	NICKY-TAMWES38689	2006-05-17	M	64067	2005-12-03	2006-03-18	Small	4.14	1	900
7048	ROXY	STA	Staffordshire Bull Terrier	ROXYSTA38690	2006-04-11	F	18605	2005-12-04	2006-03-18	Medium	1.51	1	901
12337	ELOISE	KCS	King Charles Spaniel	ELOISEKCS38690	2006-06-29	F	22682	2005-12-04	2006-03-11	Toy	1.99	1	902
15707	FRITZ	MIS	Miniature Schnauzer	FRITZMIS38690	2006-08-28	M	42635	2005-12-04	2006-08-03	Small	3.45	1	903
14422	NIGIL	CSH	Chihuahua	NIGILCSH38690	2006-08-04	M	47045	2005-12-04	2006-07-10	Toy	4.98	1	904
11782	DAYZ	SPO	Standard Poodle	DAYZSPO38691	2006-06-19	F	10184	2005-12-05	2006-04-19	Large	3.45	1	905
8843		FBD	French Bulldog	FBD38691	2006-05-04	M	14465	2005-12-05	2006-03-10	Small	3.45	1	906
8843		FBD	French Bulldog	FBD38691	2006-05-04	F	14546	2005-12-05	2006-03-10	Small	3.45	1	907
8843		FBD	French Bulldog	FBD38691	2006-05-04	F	14566	2005-12-05	2006-03-10	Small	1.99	1	908
8843		FBD	French Bulldog	FBD38691	2006-05-04	M	14584	2005-12-05	2006-03-10	Small	3.45	1	909
17842	CANDY	BRS	Brussels Griffon	CANDYBRS38691	2006-10-04	F	25941	2005-12-05	2006-02-10	Toy	0.5	1	910
19305	TONG TONG	JRT	Jack Russell Terrier	TONG TONGJRT38691	2006-10-27	F	27904	2005-12-05	2006-03-09	Small	0.5	1	911
8133	PEPPER	CSH	Chihuahua	PEPPERCSH38691	2006-04-28	F	44014	2005-12-05	2006-04-07	Toy	2.76	1	912
17260	BONITA	MIN	Miniature Pinscher	BONITAMIN38691	2006-09-26	F	45333	2005-12-05	2006-08-23	Toy	4.98	1	913
8296	ALII	TPO	Toy Poodle	ALIITPO38691	2006-05-02	F	64086	2005-12-05	2006-04-17	Toy	4.98	1	914
9607	PACO	HAV	Havanese	PACOHAV38692	2006-05-22	M	18072	2005-12-06	2006-04-07	Toy	4.14	1	915
12466	JESSE	AIR	Airdale Terrier	JESSEAIR38692	2006-07-06	F	25473	2005-12-06	2006-03-06	Medium	4.98	1	916
13846	SOPHIE	MLT	Maltese	SOPHIEMLT38692	2006-07-26	F	25943	2005-12-06	2006-06-06	Toy	4.98	1	917
20060	GINGER			GINGER38692	2006-11-13	F	43117	2005-12-06	2006-03-10	.	4.14	1	918
10189	SHADOW	ESS	Springer Spaniel	SHADOWESS38692	2006-05-31	M	47058	2005-12-06	2006-03-18	Medium	1.15	1	919
14396	SADIE	KCS	King Charles Spaniel	SADIEKCS38692	2006-07-19	F	48770	2005-12-06	2006-06-23	Toy	4.98	1	920
9431	KIANA	BOX	Boxer	KIANABOX38693	2006-05-17	F	2543	2005-12-07	2006-04-19	Large	4.98	1	921
10850	LUNAR	TPO	Toy Poodle	LUNARTPO38693	2006-06-08	M	17764	2005-12-07	2006-04-19	Toy	3.45	1	922
21102	HANNA	EBD	English Bulldog	HANNAEBD38693	2006-11-28	F	27662	2005-12-07	2006-08-23	Medium	1.99	1	923
7755	SIR MATHEW QUIGLEY	BIC	Bichon Frise	SIR MATHEW QUIGLEYBIC38693	2006-04-24	M	44726	2005-12-07	2006-04-01	Small	1.75	1	924
17174	MEI	MIX	Mix	MEIMIX38693	2006-09-19	F	50289	2005-12-07	2006-05-22	.	0.38	0	925
12544	ZOE	SFT	Fox Terrier	ZOESFT38694	2006-07-06	F	45346	2005-12-08	2006-05-30	Small	2.76	1	926
19422	SUGAR	JRT	Jack Russell Terrier	SUGARJRT38695	2006-10-25	F	22267	2005-12-09	2006-03-29	Small	2.62	1	927
6706	KELA	BUL	Bull Terrier	KELABUL38695	2006-04-03	F	44273	2005-12-09	2006-03-09	Large	4.98	1	928
10817	ELLI	SPO	Standard Poodle	ELLISPO38696	2006-06-02	F	67398	2005-12-10	2006-04-25	Large	3.45	1	929
15915	THORNAPPLE RUBY PASSION	ASI	Australian Shepard	THORNAPPLE RUBY PASSIONASI38697	2006-08-30	F	12147	2005-12-11	2006-03-14	Medium	3.45	1	930
6917	ROCKY	BOS	Boston Terrier	ROCKYBOS38697	2006-04-12	M	41595	2005-12-11	2006-03-22	Small	2.76	1	931
20617	SACHA	YRK	Yorkshire Terrier	SACHAYRK38698	2006-11-23	F	8172	2005-12-12	2006-06-02	Toy	0.87	1	932
19689	TWEETIE	CHI	Chihuahua	TWEETIECHI38698	2006-11-06	F	16567	2005-12-12	2006-03-07	Toy	0.38	0	933
11536	HADES	TIB	Tibetan Terrier	HADESTIB38698	2006-06-14	M	26126	2005-12-12	2006-05-03	Medium	3.46	1	934
11640	DATELINE USA	GTS	Giant Schnauzer	DATELINE USAGTS38698	2006-06-21	F	41690	2005-12-12	2006-05-16	Large	4.14	1	935
13732	BLACK CANYON'S CASH	AKI	Akita	BLACK CANYON'S CASHAKI38698	2006-07-25	M	44109	2005-12-12	2006-04-12	giant	2.17	1	936
9485	PENNY	LAB	Labrador Retriever	PENNYLAB38698	2006-05-15	F	77880	2005-12-12	2006-04-10	Large	4.98	1	937
10559	KUBLA	BER	Bernese Mountain Dog	KUBLABER38699	2006-06-05	M	43054	2005-12-13	2006-04-13	Large	0.29	0	938
12633	FLOYD	SIB	Siberian Husky	FLOYDSIB38700	2006-07-06	M	27695	2005-12-14	2006-05-17	Medium	1.15	1	939
12633	FEE BEE	SIB	Siberian Husky	FEE BEESIB38700	2006-07-06	F	28489	2005-12-14	2006-05-17	Medium	0.87	1	940
16936	THRONE	MLT	Maltese	THRONEMLT38700	2006-09-15	M	34170	2005-12-14	2006-08-14	Toy	3.45	1	941
7312	POLAR BEAR	CHW	Chow Chow	POLAR BEARCHW38700	2006-04-14	M	41673	2005-12-14	2006-03-14	Medium	3.45	1	942
10327	MISSY	SHT	Shetland Sheepdog	MISSYSHT38700	2006-06-01	F	44668	2005-12-14	2006-04-14	Small	1.51	1	943
9552	GRACE	LAB	Labrador Retriever	GRACELAB38700	2006-05-18	F	45595	2005-12-14	2006-04-18	Large	4.98	1	944
7514	JET	ROD	Rhodesian Ridgeback	JETROD38701	2006-04-20	M	16329	2005-12-15	2006-03-14	Large	3.46	1	946
12740	KANE	WEI	Weimaraner	KANEWEI38701	2006-07-10	M	16393	2005-12-15	2006-06-02	Large	4.14	1	947
8510	STEWIE	MIX	Mix	STEWIEMIX38701	2006-05-01	M	16922	2005-12-15	2006-03-23	.	3.45	1	948
11123	BONNIE LEE	MIS	Miniature Schnauzer	BONNIE LEEMIS38701	2006-06-13	F	17939	2005-12-15	2006-04-29	Small	2.76	1	949
9840	CESAR	CSH	Chihuahua	CESARCSH38701	2006-05-24	M	27300	2005-12-15	2006-03-18	Toy	1.15	1	950
16070	LOCO	PAP	Papillion	LOCOPAP38701	2006-09-05	M	28466	2005-12-15	2006-08-29	Toy	3.45	1	951
17214	GUNNAR	ROT	Rottweiler	GUNNARROT38701	2006-09-25	M	45288	2005-12-15	2006-04-09	giant	0.87	1	952
13480	KOA	BOX	Boxer	KOABOX38701	2006-07-19	M	47384	2005-12-15	2006-03-23	Large	0.66	1	953
19303	SCOUT	MIX	Mix	SCOUTMIX38701	2006-10-27	F	49559	2005-12-15	2006-10-09	.	3.45	1	954
10913	MALLOW	WES	West Highland Terrier	MALLOWWES38701	2006-06-07	F	66809	2005-12-15	2006-04-07	Small	2.62	1	955
20412	LEFTY	ACD	Australian Cattle Dog	LEFTYACD38702	2006-11-18	M	11907	2005-12-16	2006-04-08	Medium	4.14	1	956
18035	BAILEY	LAB	Labrador Retriever	BAILEYLAB38702	2006-10-09	F	45991	2005-12-16	2006-03-31	Large	0.87	1	957
17288	QOOTA	SBA	Shiba-inu	QOOTASBA38703	2006-09-26	M	45326	2005-12-17	2006-09-05	Small	4.98	1	958
21742	CHIP	CSH	Chihuahua	CHIPCSH38703	2006-11-10	M	49409	2005-12-17	2006-10-13	Toy	2.76	1	959
9619	TIMMY	MLT	Maltese	TIMMYMLT38704	2006-05-18	M	44860	2005-12-18	2006-04-11	Toy	4.14	1	960
17635	TOWNSENDS SUGAR	MAL	Alaskan Malamute	TOWNSENDS SUGARMAL38704	2006-10-02	F	86826	2005-12-18	2006-05-16	Large	2.17	1	961
9740	KOTA	LAB	Labrador Retriever	KOTALAB38705	2006-05-19	F	14446	2005-12-19	2006-05-03	Large	4.14	1	962
9327	TANK	DCW	Dachshund	TANKDCW38705	2006-05-17	M	46032	2005-12-19	2006-04-27	Small	4.98	1	963
15147	ROONEY	ROT	Rottweiler	ROONEYROT38706	2006-08-14	M	16216	2005-12-20	2006-07-14	giant	3.45	1	964
13492	CHEEKIE CHOPS	FBD	French Bulldog	CHEEKIE CHOPSFBD38706	2006-07-20	F	16369	2005-12-20	2006-04-28	Small	1.15	1	965
9164	VINNEY	CSH	Chihuahua	VINNEYCSH38706	2006-05-15	M	17523	2005-12-20	2006-04-14	Toy	4.14	1	966
11370	DAKOTA	LAB	Labrador Retriever	DAKOTALAB38706	2006-06-19	M	21667	2005-12-20	2006-03-17	Large	0.17	0	967
11692	GOLIATH CRUZ	PIT	Pitbull Terrier	GOLIATH CRUZPIT38706	2006-06-21	M	22355	2005-12-20	2006-03-16	Medium	1.51	1	968
21165	ALBERTA	MIX	Mix	ALBERTAMIX38706	2006-11-29	F	64056	2005-12-20	2006-11-08	.	4.14	1	969
13284	KATANA CATRIELA	ARG	Argentine Dogo	KATANA CATRIELAARG38707	2006-07-17	F	15607	2005-12-21	2006-03-30	Large	3.45	1	970
19707	BARON	WEI	Weimaraner	BARONWEI38708	2006-11-03	M	47385	2005-12-22	2006-09-01	Large	4.98	1	971
9624	RUMBA	BER	Bernese Mountain Dog	RUMBABER38709	2006-05-22	F	47178	2005-12-23	2006-04-27	Large	4.14	1	972
9624	REAGE	BER	Bernese Mountain Dog	REAGEBER38709	2006-05-22	F	47225	2005-12-23	2006-04-27	Large	4.14	1	973
21320	PIP	NEW	Newfoundland	PIPNEW38709	2006-12-04	M	47440	2005-12-23	2006-04-17	giant	0.22	0	974
11176	EVIE	LAB	Labrador Retriever	EVIELAB38710	2006-06-14	F	18271	2005-12-24	2006-04-29	Large	1.15	1	975
18258	MARLEY	MIS	Miniature Schnauzer	MARLEYMIS38710	2006-10-09	M	26556	2005-12-24	2006-09-08	Small	4.14	1	976
10240	MOMOKA	COC	Cocker Spaniel	MOMOKACOC38710	2006-06-01	F	43923	2005-12-24	2006-04-21	Small	1.99	1	977
9944	STELLA	GSP	German Shorthaired Pointer	STELLAGSP38711	2006-05-30		25571	2005-12-25	2006-04-07	Large	1.15	1	978
11885	C.J.	MIX	Mix	C.J.MIX38711	2006-06-24	M	47833	2005-12-25	2006-06-10	.	3.45	1	979
21560	RUKIA	ASI	Australian Shepard	RUKIAASI38711	2006-12-08	F	50363	2005-12-25	2006-11-09	Medium	3.45	1	980
17212	MOLLY	GLD	Golden Retriever	MOLLYGLD38711	2006-09-19	F	77969	2005-12-25	2006-08-21	Large	4.98	1	981
14249	LIBBY	RAT	Rat Terrier	LIBBYRAT38712	2006-08-02	F	11311	2005-12-26	2006-06-30	Small	4.98	1	982
14975	BENITA	MIX	Mix	BENITAMIX38712	2006-08-15	F	27606	2005-12-26	2006-05-11	.	0.5	1	983
16824	TRUMAN	BOS	Boston Terrier	TRUMANBOS38713	2006-09-15	M	18364	2005-12-27	2006-08-15	Small	3.45	1	984
10984	INDIAN	SPO	Standard Poodle	INDIANSPO38713	2006-06-02	M	25098	2005-12-27	2006-05-12	Large	2.76	1	985
16704	LOLA	POM	Pomeranian	LOLAPOM38713	2006-09-13	F	27906	2005-12-27	2006-04-19	Toy	0.5	1	986
17744	JACK	JRT	Jack Russell Terrier	JACKJRT38713	2006-10-03	M	47769	2005-12-27	2006-04-29	Small	0.87	1	987
9164	CHINA	CSH	Chihuahua	CHINACSH38714	2006-05-15	F	17513	2005-12-28	2006-04-14	Toy	0.87	1	988
17611	SKIDMARK	BOR	Border Collie	SKIDMARKBOR38714	2006-09-27	M	23957	2005-12-28	2006-08-25	Medium	2.17	1	989
15326	PRINCESS LEIA	BEA	Beagle	PRINCESS LEIABEA38714	2006-08-21	F	24477	2005-12-28	2006-04-19	Small	0.87	1	990
9591	ELLIOTT	GLD	Golden Retriever	ELLIOTTGLD38714	2006-05-22	M	42422	2005-12-28	2006-04-05	Large	0.87	1	991
9812	TORY	YRK	Yorkshire Terrier	TORYYRK38714	2006-05-19	M	78970	2005-12-28	2006-04-21	Toy	3.45	1	992
14754	SABRINA	SAL	Saluki	SABRINASAL38715	2006-08-08	F	18655	2005-12-29	2006-04-05	Large	2.62	1	993
10325	BLOC			BLOC38715	2006-06-02	M	22256	2005-12-29	2006-04-14	.	1.51	1	994
11413	SHANTI	CSH	Chihuahua	SHANTICSH38715	2006-06-16	F	44330	2005-12-29	2006-05-15	Toy	3.45	1	995
18165	PEARL	MLT	Maltese	PEARLMLT38716	2006-09-18	F	10309	2005-12-30	2006-08-15	Toy	3.45	1	996
18147	FYN	ASI	Australian Shepard	FYNASI38716	2006-10-11	M	48671	2005-12-30	2006-09-27	Medium	3.45	1	997
13063	TOFUTTI	WES	West Highland Terrier	TOFUTTIWES38717	2006-07-14	F	22707	2005-12-31	2006-05-09	Small	4.14	1	998
12546	MEG	WES	West Highland Terrier	MEGWES38717	2006-07-06	F	23183	2005-12-31	2006-04-01	Small	1.15	1	999
21582	GUS	CHI	Chihuahua	GUSCHI38717	2006-12-08	M	46793	2005-12-31	2006-11-22	Toy	3.45	1	1000
11327	MISGAR	AFG	Afghan Hound	MISGARAFG38717	2006-06-09	M	64590	2005-12-31	2006-05-19	Large	2.17	1	1001
11327	SMOKE	AFG	Afghan Hound	SMOKEAFG38717	2006-06-09	M	64599	2005-12-31	2006-05-19	Large	2.17	1	1002
14507	WAR THUNDER	BDF	Bouvier Des Flandres	WAR THUNDERBDF38718	2006-08-07	M	10960	2006-01-01	2006-04-05	Large	3.45	1	1003
14693	TIKKI	MIX	Mix	TIKKIMIX38718	2006-08-04	F	14878	2006-01-01	2006-07-07	.	3.45	1	1004
9820	WALLY	ABD	Bulldog	WALLYABD38718	2006-05-23	M	15928	2006-01-01	2006-04-25	Large	1.99	1	1005
12261	BANKER			BANKER38718	2006-06-30	M	16383	2006-01-01	2006-04-25	.	0.87	1	1006
20521	POE	MIX	Mix	POEMIX38718	2006-11-15	F	17558	2006-01-01	2006-04-07	.	0.05	0	1007
17076	ZOE	MIX	Mix	ZOEMIX38718	2006-09-19	F	18258	2006-01-01	2006-08-15	.	4.14	1	1008
20942	NICKIE	CSH	Chihuahua	NICKIECSH38718	2006-11-29	M	18673	2006-01-01	2006-07-28	Toy	0.13	0	1009
22481	TING	MIX	Mix	TINGMIX38718	2006-12-25	F	22500	2006-01-01	2006-11-14	.	4.14	1	1010
461	JESSICA	BOR	Border Collie	JESSICABOR38718	2006-12-23	F	23348	2006-01-01	2006-12-02	Medium	4.98	1	1011
8522	PARKER	WES	West Highland Terrier	PARKERWES38718	2006-04-29	M	26724	2006-01-01	2006-03-27	Small	3.45	1	1012
17446	SAM	DCL	Dachshund	SAMDCL38718	2006-09-26	M	32155	2006-01-01	2006-07-22	Small	2.17	1	1013
11684	LOUIS	CLH	Chihuahua	LOUISCLH38718	2006-06-22	F	44837	2006-01-01	2006-06-01	Toy	4.14	1	1015
15322	ADDRIANE	BOX	Boxer	ADDRIANEBOX38718	2006-08-19	F	45450	2006-01-01	2006-07-07	Large	1.75	1	1017
12008	FAITH	GER	German Shepard	FAITHGER38718	2006-06-21	F	45641	2006-01-01	2006-05-22	Large	4.14	1	1018
13215	BEAU	DCW	Dachshund	BEAUDCW38718	2006-07-14	M	47356	2006-01-01	2006-06-14	Small	3.45	1	1019
15397	COOTER	ABD	Bulldog	COOTERABD38718	2006-08-19	F	65679	2006-01-01	2006-06-22	Large	3.46	1	1020
15397	ALLEY	ABD	Bulldog	ALLEYABD38718	2006-08-19	F	65682	2006-01-01	2006-06-23	Large	3.46	1	1021
22189	PSYCHO	MIX	Mix	PSYCHOMIX38718	2006-12-18	M	66746	2006-01-01	2006-11-04	.	3.45	1	1022
21160	JAEGER	GER	German Shepard	JAEGERGER38718	2006-11-21	M	66844	2006-01-01	2006-09-14	Large	0.5	1	1023
7513	HOPEWELL	SFT	Fox Terrier	HOPEWELLSFT38718	2006-04-17	M	71594	2006-01-01	2006-03-14	Small	3.46	1	1024
18518	PEANUT	DSM	Dachshund	PEANUTDSM38718	2006-10-16	F	86661	2006-01-01	2006-10-09	Small	1.15	1	1025
8519	LILLI	CHW	Chow Chow	LILLICHW38719	2006-05-05	F	17974	2006-01-02	2006-04-03	Medium	3.45	1	1026
22346	CHARLIE	MLT	Maltese	CHARLIEMLT38719	2006-12-22		23340	2006-01-02	2006-10-25	Toy	2.17	1	1027
8111	LARUA			LARUA38720	2006-05-01	F	23109	2006-01-03	2006-03-28	.	2.76	1	1028
12476	ABBY	MAS	Mastiff	ABBYMAS38720	2006-07-06	F	26749	2006-01-03	2006-04-10	giant	2.62	1	1029
19964	LILY	BEA	Beagle	LILYBEA38720	2006-11-13	F	44952	2006-01-03	2006-10-07	Small	2.17	1	1030
20397	PAKO	PIT	Pitbull Terrier	PAKOPIT38721	2006-11-17	M	24191	2006-01-04	2006-05-04	Medium	4.14	1	1031
10500	CLYDE	EBD	English Bulldog	CLYDEEBD38721	2006-06-01	M	28412	2006-01-04	2006-05-02	Medium	3.45	1	1032
16129	QUINCY	MIX	Mix	QUINCYMIX38721	2006-09-06	M	28569	2006-01-04	2006-04-25	.	0.5	1	1033
12656	JOY	LAB	Labrador Retriever	JOYLAB38721	2006-07-01	M	40114	2006-01-04	2006-04-18	Large	0.66	1	1034
10357	TEDDY	HAV	Havanese	TEDDYHAV38721	2006-06-05	M	40460	2006-01-04	2006-05-02	Toy	4.14	1	1035
14471	SKIPPER	JRT	Jack Russell Terrier	SKIPPERJRT38722	2006-08-08	M	47823	2006-01-05	2006-07-08	Small	3.45	1	1036
17842	OLIVER	BRS	Brussels Griffon	OLIVERBRS38723	2006-10-04	M	25304	2006-01-06	2006-02-10	Toy	1.15	1	1037
13859	CHEROKEE	LAB	Labrador Retriever	CHEROKEELAB38723	2006-07-26	F	35816	2006-01-06	2006-06-05	Large	2.62	1	1038
15816	TOFFEE	MIX	Mix	TOFFEEMIX38724	2006-08-30	M	16656	2006-01-07	2006-08-10	.	4.14	1	1039
18292	DARLA	MIX	Mix	DARLAMIX38724	2006-10-10		51031	2006-01-07	2006-09-26	.	2.17	1	1040
8991	GUNNIER	LAB	Labrador Retriever	GUNNIERLAB38725	2006-05-13	M	14494	2006-01-08	2006-04-29	Large	1.51	1	1041
11414	KONA	NFT	Norfolk Terrier	KONANFT38725	2006-06-16	M	45027	2006-01-08	2006-04-28	Small	0.07	0	1043
12418	MAC	PUG	Pug	MACPUG38725	2006-06-30	M	64635	2006-01-08	2006-04-21	Small	4.98	1	1044
14434	ELSA	NOR	Norfolk Terrier	ELSANOR38725	2006-08-04	F	67223	2006-01-08	2006-04-07	Small	1.99	1	1045
10423	BLONDIE	MIX	Mix	BLONDIEMIX38726	2006-05-31	F	15527	2006-01-09	2006-05-04	.	4.14	1	1046
14089	MOLLIE	ACD	Australian Cattle Dog	MOLLIEACD38726	2006-07-31	F	18611	2006-01-09	2006-05-15	Medium	8.38	1	1047
14747	KATIE	MIX	Mix	KATIEMIX38726	2006-08-14	F	44958	2006-01-09	2006-07-25	.	4.98	1	1048
22121	BEVERLY	YRK	Yorkshire Terrier	BEVERLYYRK38726	2006-12-18	M	45239	2006-01-09	2006-07-06	Toy	3.45	1	1049
18452	ENZO	GER	German Shepard	ENZOGER38726	2006-10-16	M	45452	2006-01-09	2006-05-01	Large	1.51	1	1050
18070	PRESTON	COC	Cocker Spaniel	PRESTONCOC38726	2006-10-09	M	45964	2006-01-09	2006-09-06	Small	3.45	1	1051
109	KUSAI	CSH	Chihuahua	KUSAICSH38726	2006-12-29	M	50280	2006-01-09	2006-05-10	Toy	3.46	1	1052
18245	DREXEL	SHI	Shih-tzu	DREXELSHI38726	2006-10-11	F	50920	2006-01-09	2006-07-20	Small	4.14	1	1053
18245	TUCK TUCK	SHI	Shih-tzu	TUCK TUCKSHI38726	2006-10-11	M	50957	2006-01-09	2006-07-20	Small	4.14	1	1054
15625	VALENTINE	AKI	Akita	VALENTINEAKI38727	2006-08-23	F	15434	2006-01-10	2006-06-06	giant	2.76	1	1055
15134	TEQUILA MANUEL	CSH	Chihuahua	TEQUILA MANUELCSH38727	2006-08-09	M	40255	2006-01-10	2006-05-10	Toy	3.45	1	1056
13331	MOLLIE	SIB	Siberian Husky	MOLLIESIB38727	2006-07-19	F	46144	2006-01-10	2006-06-22	Medium	3.45	1	1057
20976	ELF	TIB	Tibetan Terrier	ELFTIB38727	2006-11-29	M	46274	2006-01-10	2006-04-26	Medium	0.17	0	1058
20168	PERCY	PAP	Papillion	PERCYPAP38727	2006-11-15		46402	2006-01-10	2006-10-11	Toy	3.45	1	1059
15094	DUKE	POM	Pomeranian	DUKEPOM38727	2006-08-16	M	47668	2006-01-10	2006-08-02	Toy	3.45	1	1060
20168	DEN	PAP	Papillion	DENPAP38727	2006-11-15	M	47814	2006-01-10	2006-10-11	Toy	3.45	1	1061
8781	ZA ZOU	SAL	Saluki	ZA ZOUSAL38728	2006-05-08	M	27335	2006-01-11	2006-04-07	Large	0.38	0	1062
8781	SHERGAR	SAL	Saluki	SHERGARSAL38728	2006-05-08	M	42925	2006-01-11	2006-04-07	Large	0.13	0	1063
10971	PUPSIK	MLT	Maltese	PUPSIKMLT38728	2006-06-12	F	45092	2006-01-11	2006-05-06	Toy	2.76	1	1064
17817	SKABENGA	JRT	Jack Russell Terrier	SKABENGAJRT38728	2006-10-04	F	49968	2006-01-11	2006-10-01	Small	2.17	1	1065
20616	HENRY	ITI	Italian Grey Hound	HENRYITI38729	2006-11-21	M	28410	2006-01-12	2006-07-07	Toy	0.38	0	1066
19819	FRANQ	BEA	Beagle	FRANQBEA38729	2006-11-09	M	45848	2006-01-12	2006-04-24	Small	1.51	1	1067
497	GEORGIA	MIX	Mix	GEORGIAMIX38729	2007-01-05	F	46551	2006-01-12	2006-04-28	.	1.99	1	1068
11532	ROSIE	SPI	Shar-pei	ROSIESPI38730	2006-06-19	F	10326	2006-01-13	2006-05-22	Medium	4.98	1	1069
19050	FANCIBUL BIJOU PRECIEUX	FBD	French Bulldog	FANCIBUL BIJOU PRECIEUXFBD38730	2006-10-25	F	17468	2006-01-13	2006-06-12	Small	0.29	0	1070
18628	LONE RANGER	HAV	Havanese	LONE RANGERHAV38730	2006-10-16	M	31019	2006-01-13	2006-06-03	Toy	0.87	1	1072
9183	CHAMOIS	AFG	Afghan Hound	CHAMOISAFG38730	2006-05-16	F	37210	2006-01-13	2006-04-14	Large	4.14	1	1073
16060	MADI	KCS	King Charles Spaniel	MADIKCS38730	2006-09-05	F	46512	2006-01-13	2006-05-06	Toy	0.66	1	1074
9831	VAREKAI	KCS	King Charles Spaniel	VAREKAIKCS38730	2006-05-24	M	46851	2006-01-13	2006-04-24	Toy	3.45	1	1075
13307	ROCKO	PUG	Pug	ROCKOPUG38730	2006-07-18	M	47264	2006-01-13	2006-06-08	Small	0.38	0	1076
13307	COOKIE	PUG	Pug	COOKIEPUG38730	2006-07-18	F	48035	2006-01-13	2006-06-08	Small	3.45	1	1077
9693	MOOSHU	SPI	Shar-pei	MOOSHUSPI38731	2006-05-23	M	22253	2006-01-14	2006-05-08	Medium	0.38	0	1078
12105	NEWMAN	BOX	Boxer	NEWMANBOX38731	2006-06-28	M	45832	2006-01-14	2006-06-15	Large	3.45	1	1079
1072	KAYA	SIB/ACD	Mix	KAYASIB/ACD38731	2007-01-04	F	64628	2006-01-14	2006-06-14	.	1.51	1	1080
16559	KOA	NEW	Newfoundland	KOANEW38732	2006-09-08	M	19495	2006-01-15	2006-08-04	giant	3.45	1	1081
9840	LUCKY SPOT	CSH	Chihuahua	LUCKY SPOTCSH38732	2006-05-24	M	26966	2006-01-15	2006-03-18	Toy	1.51	1	1082
9840	COTTON	CSH	Chihuahua	COTTONCSH38732	2006-05-24	F	27022	2006-01-15	2006-03-18	Toy	0.66	1	1083
8284	EMIL	VIZ	Vizsla	EMILVIZ38732	2006-05-01	M	27113	2006-01-15	2006-04-14	Large	1.75	1	1084
9840	DUCKSIE	CSH	Chihuahua	DUCKSIECSH38732	2006-05-24	F	27256	2006-01-15	2006-03-18	Toy	0.87	1	1085
9840	MELANIE OF CATALINA	CSH	Chihuahua	MELANIE OF CATALINACSH38732	2006-05-24	F	27269	2006-01-15	2006-03-18	Toy	0.38	0	1086
9754	GEORGE	POM	Pomeranian	GEORGEPOM38732	2006-05-24	M	43610	2006-01-15	2006-04-18	Toy	4.14	1	1088
10112	RINGO	BOX	Boxer	RINGOBOX38732	2006-05-30	M	44091	2006-01-15	2006-04-12	Large	4.98	1	1089
18820	BANDIT	PAP	Papillion	BANDITPAP38732	2006-10-18	M	46882	2006-01-15	2006-06-20	Toy	0.07	0	1090
11240	PUPPY	CSH	Chihuahua	PUPPYCSH38732	2006-06-14	F	46889	2006-01-15	2006-05-23	Toy	3.45	1	1091
13403	JAMIE	BOR	Border Collie	JAMIEBOR38732	2006-07-19	M	46979	2006-01-15	2006-04-06	Medium	1.15	1	1092
13403	BLUE	OBR	Border Collie	BLUEOBR38732	2006-07-19	F	47735	2006-01-15	2006-04-06	Medium	0.87	1	1093
632	WILEY	COC	Cocker Spaniel	WILEYCOC38732	2007-01-09	M	50606	2006-01-15	2006-05-21	Small	1.99	1	1094
22032	PEQUE			PEQUE38732	2006-12-18	M	67741	2006-01-15	2006-11-10	.	0.1	0	1095
17698	BLANCA	MIS	Miniature Schnauzer	BLANCAMIS38732	2006-10-03	F	78948	2006-01-15	2006-04-17	Small	2.76	1	1096
8815	POKI	CSH	Chihuahua	POKICSH38733	2006-05-08	M	15725	2006-01-16	2006-04-15	Toy	4.14	1	1097
15567	NANI	LAS	Lhasa Apso	NANILAS38734	2006-08-24	F	17992	2006-01-17	2006-05-05	Small	2.76	1	1098
356	PASSION	YRK	Yorkshire Terrier	PASSIONYRK38735	2006-12-19	F	41282	2006-01-18	2006-11-21	Toy	3.45	1	1099
10964	DANNY	COC	Cocker Spaniel	DANNYCOC38737	2006-06-08	M	165	2006-01-20	2006-05-17	Small	1.51	1	1100
13785	SUE-Z-Q	CCR	Chinese Crested	SUE-Z-QCCR38737	2006-07-26	F	48024	2006-01-20	2006-06-05	Toy	2.17	1	1101
14449	CHI	BUR	Burmese Mountain Dog	CHIBUR38738	2006-08-08	M	42343	2006-01-21	2006-07-17	Large	3.45	1	1103
17634	WINSTON	GLD	Golden Retriever	WINSTONGLD38738	2006-09-25	M	66039	2006-01-21	2006-05-25	Large	0.29	0	1104
19705	FOXI SOX	CHI	Chihuahua	FOXI SOXCHI38739	2006-11-02	F	16167	2006-01-22	2006-08-24	Toy	3.46	1	1105
9887	NATALIA	GRT	Great Dane	NATALIAGRT38740	2006-05-22	F	47703	2006-01-23	2006-05-01	giant	4.98	1	1106
440	DOLLIE	JRT	Jack Russell Terrier	DOLLIEJRT38741	2007-01-05	F	11627	2006-01-24	2006-08-21	Small	0.87	1	1107
11984	MISO			MISO38741	2006-06-27	M	23406	2006-01-24	2006-05-24	.	4.14	1	1108
19379	SASSY	TPO	Toy Poodle	SASSYTPO38741	2006-10-25	F	24321	2006-01-24	2006-07-24	Toy	4.98	1	1109
12001	ROSCHEL'S CONUNDRUM	BOR	Border Collie	ROSCHEL'S CONUNDRUMBOR38741	2006-06-27	F	64644	2006-01-24	2006-06-02	Medium	4.14	1	1110
19667	CHETT			CHETT38742	2006-11-07	M	15553	2006-01-25	2006-09-01	.	1.51	1	1111
11330	TEABEAR TAILOR MAID	CHN	Japanese Chin	TEABEAR TAILOR MAIDCHN38743	2006-06-14	F	16303	2006-01-26	2006-05-22	Toy	2.17	1	1112
20942	TOBIE	MLT	Maltese	TOBIEMLT38743	2006-11-29	M	18647	2006-01-26	2006-07-26	Toy	0.07	0	1113
12538	SPEADY	LAB	Labrador Retriever	SPEADYLAB38743	2006-07-07	F	25848	2006-01-26	2006-06-16	Large	2.76	1	1114
11470	ALFONSE	DSC	Dachshund	ALFONSEDSC38743	2006-06-17	M	26620	2006-01-26	2006-06-02	Small	3.45	1	1115
10960	STAR	SHT	Shetland Sheepdog	STARSHT38743	2006-06-12	F	45996	2006-01-26	2006-05-22	Small	1.51	1	1116
12975	HIROKO	PUG	Pug	HIROKOPUG38743	2006-07-11	M	67423	2006-01-26	2006-06-07	Small	4.14	1	1117
1611	COCO	MIX	Mix	COCOMIX38744	2007-01-24	F	10350	2006-01-27	2006-08-01	.	0.1	0	1118
19464	GROVER			GROVER38744	2006-11-01	M	26059	2006-01-27	2006-10-09	.	3.45	1	1119
11520	ELLA	MIX	Mix	ELLAMIX38744	2006-06-20	F	46261	2006-01-27	2006-05-25	.	4.98	1	1120
11858	MAGIC	GRP	Great Pyranese	MAGICGRP38744	2006-06-26	M	46340	2006-01-27	2006-05-26	giant	3.45	1	1121
16737	VIKA	MIX	Mix	VIKAMIX38744	2006-09-11	F	47811	2006-01-27	2006-05-22	.	0.38	0	1122
11858	MANDY	GRP	Great Pyranese	MANDYGRP38744	2006-06-26	F	47996	2006-01-27	2006-05-26	giant	3.45	1	1123
22000	RUSTY			RUSTY38744	2006-12-16	M	49848	2006-01-27	2006-11-15	.	3.45	1	1124
16751	EDIE	SHI	Shih-tzu	EDIESHI38744	2006-09-14	F	69215	2006-01-27	2006-07-01	Small	4.14	1	1125
18897	KRIPKE	MIS	Miniature Schnauzer	KRIPKEMIS38745	2006-10-19	M	23608	2006-01-28	2006-06-01	Small	0.38	0	1126
16484	SNOOP	BOX	Boxer	SNOOPBOX38745	2006-09-08	M	28559	2006-01-28	2006-08-03	Large	0.29	0	1127
17267	SCOOBY	MIX	Mix	SCOOBYMIX38745	2006-09-25	M	44401	2006-01-28	2006-05-23	.	2.62	1	1128
13596	CHARLIE	SCT	Scottish Terrier	CHARLIESCT38745	2006-07-21	M	47198	2006-01-28	2006-06-02	Small	0.66	1	1129
16779	CHARLIE	FOX	Fox Terrier	CHARLIEFOX38746	2006-09-15	M	12316	2006-01-29	2006-06-14	Small	0.17	0	1130
1653	ZION AQUINAS	GRT	Great Dane	ZION AQUINASGRT38746	2007-01-26	M	15017	2006-01-29	2006-12-15	giant	1.75	1	1131
11536	PAEGAN	TIB	Tibetan Terrier	PAEGANTIB38746	2006-06-14	M	26039	2006-01-29	2006-05-03	Medium	4.98	1	1132
21102	RAMA	EBD	English Bulldog	RAMAEBD38746	2006-11-28	M	28094	2006-01-29	2006-08-23	Medium	4.14	1	1133
14793	SADIE	BEA	Beagle	SADIEBEA38747	2006-08-11	F	46521	2006-01-30	2006-07-21	Small	4.98	1	1134
12978	FERN	MIS	Miniature Schnauzer	FERNMIS38747	2006-07-11	F	66029	2006-01-30	2006-06-10	Small	4.14	1	1135
19112	GLOBUS CROWN ROYALE	DCL	Dachshund	GLOBUS CROWN ROYALEDCL38748	2006-10-26	M	27085	2006-01-31	2006-06-27	Small	0.17	0	1136
757	CHARADE DRACO DJIMON	TPO	Toy Poodle	CHARADE DRACO DJIMONTPO38748	2007-01-11	M	28001	2006-01-31	2006-09-07	Toy	6.4	1	1137
11564	NORBU	TIB	Tibetan Terrier	NORBUTIB38748	2006-06-16	M	47895	2006-01-31	2006-05-10	Medium	4.98	1	1138
11501	SOPHIE	BOR	Border Collie	SOPHIEBOR38749	2006-06-17	F	15346	2006-02-01	2006-05-17	Medium	3.45	1	1139
20879	KUSH	PIT	Pitbull Terrier	KUSHPIT38749	2006-11-27	M	17747	2006-02-01	2006-11-13	Medium	4.14	1	1140
17657	KYLA	LAB	Labrador Retriever	KYLALAB38749	2006-10-03	F	19462	2006-02-01	2006-08-09	Large	1.15	1	1141
39	ADIE	SBT	Staffordshire Bull Terrier	ADIESBT38749	2006-12-29	F	19586	2006-02-01	2006-12-09	Medium	4.14	1	1142
17583	PEANUT	CSH	Chihuahua	PEANUTCSH38749	2006-10-02	M	19662	2006-02-01	2006-08-22	Toy	2.17	1	1143
10542	LILO			LILO38749	2006-06-05	F	23649	2006-02-01	2006-05-12	.	0.5	1	1144
13062	MURPHY	DSC	Dachshund	MURPHYDSC38749	2006-07-01	M	25462	2006-02-01	2006-06-15	Small	4.14	1	1145
16378	LILLY	MLT	Maltese	LILLYMLT38749	2006-09-06	F	26899	2006-02-01	2006-07-26	Toy	3.46	1	1146
10992	ROCO	CSH	Chihuahua	ROCOCSH38749	2006-06-12	M	43511	2006-02-01	2006-05-09	Toy	2.76	1	1147
19700	JAVA	MIX	Mix	JAVAMIX38749	2006-11-06	F	43903	2006-02-01	2006-08-07	.	3.46	1	1148
17689	SOPHIE	MIX	Mix	SOPHIEMIX38749	2006-09-28	F	47048	2006-02-01	2006-09-01	.	2.76	1	1149
14424	JAKE	LAB	Labrador Retriever	JAKELAB38749	2006-08-07	M	48020	2006-02-01	2006-07-11	Large	1.99	1	1150
21960	NEKOMA	BOR	Border Collie	NEKOMABOR38749	2006-12-18	F	49214	2006-02-01	2006-09-18	Medium	3.45	1	1151
16558	JACKSON	BAS	Basset Hound	JACKSONBAS38749	2006-09-08	M	49329	2006-02-01	2006-08-06	Small	1.51	1	1152
22436	GUINNESS	JRT	Jack Russell Terrier	GUINNESSJRT38749	2006-12-27	M	49512	2006-02-01	2006-05-30	Small	2.76	1	1153
1646	PATRICK	DOB	Doberman Pinscher	PATRICKDOB38749	2007-01-25	M	51932	2006-02-01	2006-12-26	Large	1.15	1	1154
17428	TRISTEN	DOB	Doberman Pinscher	TRISTENDOB38749	2006-09-27	M	86827	2006-02-01	2006-05-18	Large	1.51	1	1155
12982	BELLA	MLT	Maltese	BELLAMLT38750	2006-07-11	F	27694	2006-02-02	2006-05-02	Toy	0.29	0	1156
5404	SCOOBIE	MAL	Alaskan Malamute	SCOOBIEMAL38751	2006-03-22	M	35288	2006-02-03	2006-03-01	Large	4.14	1	1157
1156	SKYE	BOR	Border Collie	SKYEBOR38751	2007-01-09	F	40419	2006-02-03	2006-09-06	Medium	4.14	1	1158
13848	ARIA			ARIA38751	2006-07-27	F	47837	2006-02-03	2006-05-22	.	2.62	1	1159
1580	CAPTAIN JOHNNY	NFT	Norfolk Terrier	CAPTAIN JOHNNYNFT38751	2006-12-29	M	48503	2006-02-03	2006-12-05	Small	2.76	1	1160
20870	APOLLO	MAS	Mastiff	APOLLOMAS38752	2006-11-28	M	11327	2006-02-04	2006-08-08	giant	4.14	1	1161
12696	MIDWATCH EDDIE	SKP	Schipperke	MIDWATCH EDDIESKP38752	2006-07-10	M	23400	2006-02-04	2006-06-17	Small	0.66	1	1162
12696	STAR	SKP	Schipperke	STARSKP38752	2006-07-10	F	24251	2006-02-04	2006-06-17	Small	1.51	1	1163
12129	RYAN	COC	Cocker Spaniel	RYANCOC38752	2006-06-29	M	46659	2006-02-04	2006-05-31	Small	3.45	1	1164
652	CLUSSEXX GIRL NEXT DOOR	CLM	Clumber Spaniel	CLUSSEXX GIRL NEXT DOORCLM38753	2007-01-10	F	51126	2006-02-05	2006-05-10	Medium	0.29	0	1165
1245	MIAKO	AKI	Akita	MIAKOAKI38754	2007-01-18	F	16486	2006-02-06	2006-06-12	giant	3.45	1	1166
11947	LOLA	MIX	Mix	LOLAMIX38755	2006-06-26	F	21172	2006-02-07	2006-06-15	.	4.14	1	1167
10448	ATLAS	BMS	Mastiff	ATLASBMS38755	2006-05-02	M	32956	2006-02-07	2006-03-26	giant	0.07	0	1168
19073	ISIS	STS	Standard Schnauzer	ISISSTS38755	2006-10-26	F	47778	2006-02-07	2006-05-31	Medium	0.17	0	1169
19196	BUD	LAB	Labrador Retriever	BUDLAB38756	2006-10-30	M	42212	2006-02-08	2006-06-17	Large	4.98	1	1170
12283	SHERRY	BIC	Bichon Frise	SHERRYBIC38756	2006-07-01	F	44179	2006-02-08	2006-06-17	Small	4.98	1	1171
11573	SAM	LAB	Labrador Retriever	SAMLAB38756	2006-06-20	M	45168	2006-02-08	2006-05-02	Large	4.98	1	1172
14869	HUDSON	ASI	Australian Shepard	HUDSONASI38756	2006-08-14	M	46372	2006-02-08	2006-06-30	Medium	0.66	1	1173
15706	DANA	MIX	Mix	DANAMIX38756	2006-08-09	F	67583	2006-02-08	2006-07-05	.	3.45	1	1174
18967	CHAI	SHI	Shih-tzu	CHAISHI38757	2006-10-18	M	22426	2006-02-09	2006-09-20	Small	3.45	1	1175
19612	TALGUI	BOS	Boston Terrier	TALGUIBOS38757	2006-09-25	M	33803	2006-02-09	2006-07-24	Small	0.38	0	1176
13310	PILY			PILY38757	2006-07-14	M	67296	2006-02-09	2006-06-09	.	3.45	1	1178
10340	WOMEN	WEI	Weimaraner	WOMENWEI38758	2006-06-02	F	18265	2006-02-10	2006-05-11	Large	2.62	1	1179
1018	CHARLIE	ESS	Springer Spaniel	CHARLIEESS38758	2007-01-16	M	44614	2006-02-10	2006-12-22	Medium	3.45	1	1180
19078	MEGAN	DOB	Doberman Pinscher	MEGANDOB38759	2006-10-02	F	6045	2006-02-11	2006-08-11	Large	0.5	1	1181
17669	CADBURY	LAB	Labrador Retriever	CADBURYLAB38759	2006-10-02	F	20827	2006-02-11	2006-06-09	Large	0.66	1	1182
18288	LILA	FBD	French Bulldog	LILAFBD38759	2006-10-10	F	49209	2006-02-11	2006-06-09	Small	4.14	1	1183
16738	BROOKE'S PUPPY #3			BROOKE'S PUPPY #338760	2006-09-13	M	15347	2006-02-12	2006-08-08	.	4.14	1	1184
11814	BELLA	MIX	Mix	BELLAMIX38760	2006-06-22	F	16772	2006-02-12	2006-06-10	.	3.45	1	1185
12696	FLICKA	SKP	Schipperke	FLICKASKP38760	2006-07-10	F	24245	2006-02-12	2006-06-17	Small	4.14	1	1186
14609	FLASH	SKP	Schipperke	FLASHSKP38760	2006-08-08	F	47441	2006-02-12	2006-07-14	Small	2.76	1	1187
19535	PAIGE	LAB	Labrador Retriever	PAIGELAB38761	2006-11-03	F	21705	2006-02-13	2006-05-30	Large	0.04	0	1188
21539	SCOOTER	CSH	Chihuahua	SCOOTERCSH38762	2006-12-04	M	12271	2006-02-14	2006-11-04	Toy	3.45	1	1189
21604	CHARLIE	CRN	Cairn Terrier	CHARLIECRN38762	2006-12-05	M	45631	2006-02-14	2006-06-02	Small	1.15	1	1190
19700	MOCHA	MIX	Mix	MOCHAMIX38762	2006-11-06	F	47615	2006-02-14	2006-08-07	.	1.99	1	1191
20482	TRIXIE	YRK	Yorkshire Terrier	TRIXIEYRK38763	2006-11-16	F	11126	2006-02-15	2006-06-02	Toy	4.14	1	1192
15543	ELLIE	MIX	Mix	ELLIEMIX38763	2006-08-18	F	11297	2006-02-15	2006-05-19	.	2.76	1	1193
19545	FERRIS	SHI	Shih-tzu	FERRISSHI38763	2006-11-02	M	11653	2006-02-15	2006-10-24	Small	0.66	1	1194
20618	BANTHA BEOWOLF	GRT	Great Dane	BANTHA BEOWOLFGRT38763	2006-11-22	M	15082	2006-02-15	2006-07-25	giant	0.38	0	1195
21255	RUFFO			RUFFO38763	2006-11-25	M	18924	2006-02-15	2006-06-27	.	0.66	1	1197
15	KURUN	LAB	Labrador Retriever	KURUNLAB38763	2006-08-25	M	33913	2006-02-15	2006-07-15	Large	1.51	1	1198
11099	RUFFLES	SPO	Standard Poodle	RUFFLESSPO38763	2006-05-31	M	42996	2006-02-15	2006-05-18	Large	2.76	1	1199
17504	MONEY FAGERLING	CSH	Chihuahua	MONEY FAGERLINGCSH38764	2006-09-29	F	27630	2006-02-16	2006-05-19	Toy	0.66	1	1200
11655	CAL	BOR	Border Collie	CALBOR38765	2006-06-22	M	46858	2006-02-17	2006-06-02	Medium	0.05	0	1201
2142	PRIMETIME'S ANGUS	MIX	Mix	PRIMETIME'S ANGUSMIX38765	2007-02-02	M	47701	2006-02-17	2006-08-14	.	4.14	1	1202
22467	BURNIE			BURNIE38765	2006-12-28	M	49250	2006-02-17	2006-10-10	.	0.87	1	1203
22467	DYSON			DYSON38765	2006-12-28	M	49506	2006-02-17	2006-10-10	.	0.87	1	1204
13841	HEIDI	BOX	Boxer	HEIDIBOX38766	2006-07-26	F	21230	2006-02-18	2006-06-26	Large	4.98	1	1205
16130	FERDIE	CSH	Chihuahua	FERDIECSH38766	2006-08-30	M	41299	2006-02-18	2006-05-15	Toy	0.29	0	1206
20418	JENEVA	DOB	Doberman Pinscher	JENEVADOB38766	2006-11-17	F	50799	2006-02-18	2006-10-18	Large	4.14	1	1207
15587	TINY	MIX	Mix	TINYMIX38767	2006-08-25	F	15200	2006-02-19	2006-06-09	.	2.76	1	1208
11473	CHEESE	WHT	West Highland Terrier	CHEESEWHT38767	2006-06-17	M	45579	2006-02-19	2006-05-26	Small	3.45	1	1209
15873	MARLEY	GER	German Shepard	MARLEYGER38768	2006-08-29	F	9096	2006-02-20	2006-06-28	Large	0.38	0	1210
12346	MARGO	COC	Cocker Spaniel	MARGOCOC38768	2006-07-03	F	26123	2006-02-20	2006-06-05	Small	4.98	1	1211
12346	JOSHUA	COC	Cocker Spaniel	JOSHUACOC38768	2006-07-03	M	26164	2006-02-20	2006-06-05	Small	1.99	1	1212
20794	JOEY	CSH	Chihuahua	JOEYCSH38768	2006-11-28	M	28503	2006-02-20	2006-07-28	Toy	1.99	1	1213
1395	DULCE	MLT	Maltese	DULCEMLT38768	2006-12-15	F	67728	2006-02-20	2006-10-25	Toy	3.45	1	1214
17198	ROSA	CLH	Chihuahua	ROSACLH38769	2006-09-25	F	10699	2006-02-21	2006-05-27	Toy	0.5	1	1215
17198	CINDY	CLH	Chihuahua	CINDYCLH38769	2006-09-25	F	10746	2006-02-21	2006-05-27	Toy	0.29	0	1216
16915	JAVA	SHI	Shih-tzu	JAVASHI38769	2006-09-18	M	22689	2006-02-21	2006-07-05	Small	0.66	1	1218
21764	MAC	WES	West Highland Terrier	MACWES38769	2006-12-11	M	51207	2006-02-21	2006-06-30	Small	0.29	0	1219
16738	BROOKE'S PUPPY #2			BROOKE'S PUPPY #238770	2006-09-13	M	18676	2006-02-22	2006-08-08	.	4.14	1	1221
17235	WHISTLER	MIS	Miniature Schnauzer	WHISTLERMIS38770	2006-09-20	M	28543	2006-02-22	2006-05-19	Small	1.15	1	1222
13666	SKIPPER	BIC	Bichon Frise	SKIPPERBIC38770	2006-07-21	M	46777	2006-02-22	2006-06-23	Small	2.17	1	1223
20233	MINK	MIX	Mix	MINKMIX38770	2006-11-15	M	47983	2006-02-22	2006-07-09	.	0.17	0	1224
14821	TAQUITO	POM	Pomeranian	TAQUITOPOM38770	2006-07-14	M	49101	2006-02-22	2006-06-19	Toy	1.15	1	1225
18454	ROONY	SHI	Shih-tzu	ROONYSHI38771	2006-10-13	F	12260	2006-02-23	2006-09-20	Small	3.45	1	1226
18454	MAX	SHI	Shih-tzu	MAXSHI38771	2006-10-13	F	12268	2006-02-23	2006-09-20	Small	3.45	1	1227
18454	ROSY	SHI	Shih-tzu	ROSYSHI38771	2006-10-13	F	12269	2006-02-23	2006-09-20	Small	3.45	1	1228
13914	BIANCA	MLT	Maltese	BIANCAMLT38771	2006-07-27	F	21963	2006-02-23	2006-06-12	Toy	2.62	1	1229
11427	BRUNSWICK	LAB	Labrador Retriever	BRUNSWICKLAB38771	2006-06-18	M	77843	2006-02-23	2006-05-28	Large	0.87	1	1230
14615	BENNIE	MIN	Miniature Pinscher	BENNIEMIN38772	2006-08-07	F	22039	2006-02-24	2006-06-14	Toy	1.15	1	1231
15734	JOKER	COC	Cocker Spaniel	JOKERCOC38772	2006-08-28	M	23314	2006-02-24	2006-06-06	Small	2.62	1	1232
3607	RAPHAEL	MAL	Alaskan Malamute	RAPHAELMAL38773	2007-02-21	M	33667	2006-02-25	2007-01-20	Large	2.62	1	1233
12690	SCOOBY	LAB	Labrador Retriever	SCOOBYLAB38773	2006-06-26	M	46265	2006-02-25	2006-05-19	Large	4.14	1	1234
2987	REMI	FBD	French Bulldog	REMIFBD38773	2007-02-15	M	46738	2006-02-25	2007-01-15	Small	2.76	1	1235
13886	ANA	SHT	Shetland Sheepdog	ANASHT38773	2006-07-28	F	49284	2006-02-25	2006-06-27	Small	4.98	1	1236
14140	TINKERBELL	PAP	Papillion	TINKERBELLPAP38774	2006-07-31	F	18553	2006-02-26	2006-07-19	Toy	4.98	1	1237
17891	RENIE	BIC	Bichon Frise	RENIEBIC38774	2006-10-05	F	27348	2006-02-26	2006-07-22	Small	4.98	1	1238
18870	REPETE	SCT	Scottish Terrier	REPETESCT38774	2006-10-23	M	43968	2006-02-26	2006-09-21	Small	2.76	1	1239
1504	COCKY	MPO	Miniature Poodle	COCKYMPO38774	2007-01-15	M	67191	2006-02-26	2006-07-22	Small	0.29	0	1240
2235	LUCY	CCR	Chinese Crested	LUCYCCR38775	2007-02-06	F	12372	2006-02-27	2007-01-09	Toy	4.14	1	1241
13199	LILY	CSH	Chihuahua	LILYCSH38775	2006-07-13	F	45957	2006-02-27	2006-06-08	Toy	3.45	1	1242
17844	KING ROT.	GER	German Shepard	KING ROT.GER38776	2006-10-04	M	11031	2006-02-28	2006-05-04	Large	2.17	1	1243
16824	COLEMAN	PUG	Pug	COLEMANPUG38776	2006-09-15	M	18367	2006-02-28	2006-08-15	Small	1.15	1	1244
63	BOSWELL	BOS	Boston Terrier	BOSWELLBOS38776	2006-12-11	M	22954	2006-02-28	2006-06-26	Small	0.66	1	1245
12988	CHOCOLAT	TPO	Toy Poodle	CHOCOLATTPO38776	2006-07-13	F	45444	2006-02-28	2006-06-28	Toy	4.14	1	1246
12563	BOWNTY HUNTER	MIX	Mix	BOWNTY HUNTERMIX38777	2006-07-01	M	11265	2006-03-01	2006-06-05	.	1.15	1	1247
2054	UNA	BOR	Border Collie	UNABOR38777	2007-02-01	F	15064	2006-03-01	2006-08-21	Medium	2.17	1	1248
2371	HENRY	LAB	Labrador Retriever	HENRYLAB38777	2007-02-06	M	19537	2006-03-01	2006-06-13	Large	1.15	1	1249
22428	BRUNO	BOS	Boston Terrier	BRUNOBOS38777	2006-12-27	M	21344	2006-03-01	2006-11-24	Small	2.76	1	1250
1430	HOWIE	MIX	Mix	HOWIEMIX38777	2007-01-24	M	22822	2006-03-01	2006-08-14	.	4.14	1	1251
1387	TEDDY	CLH	Chihuahua	TEDDYCLH38777	2007-01-23	M	22887	2006-03-01	2006-10-05	Toy	3.45	1	1252
15519	SAVANNAH	MIX	Mix	SAVANNAHMIX38777	2006-08-24	F	31268	2006-03-01	2006-06-09	.	0.87	1	1253
12691	GODIVA	SPO	Standard Poodle	GODIVASPO38777	2006-07-07	F	43964	2006-03-01	2006-06-03	Large	4.14	1	1254
20712	SAMPSON	LAB	Labrador Retriever	SAMPSONLAB38777	2006-11-25	M	46004	2006-03-01	2006-07-28	Large	0.38	0	1255
2419	CUTIE	YRK	Yorkshire Terrier	CUTIEYRK38777	2007-02-07	F	50807	2006-03-01	2007-01-24	Toy	0.38	0	1256
18440	Therenet Immaculate Collectior	GLD	Golden Retriever	Therenet Immaculate CollectiorGLD38777	2006-10-11	F	67320	2006-03-01	2006-04-24	Large	0.04	0	1257
1073	BAILEY	SKY	Skye Terrier	BAILEYSKY38777	2007-01-02	F	77947	2006-03-01	2006-07-01	Small	0.87	1	1258
2801	SNOOPY	YRK	Yorkshire Terrier	SNOOPYYRK38778	2007-02-02	M	31646	2006-03-02	2007-01-12	Toy	4.14	1	1259
19505	CHARLIE	GSP	German Shorthaired Pointer	CHARLIEGSP38779	2006-11-02	M	16236	2006-03-03	2006-10-05	Large	3.45	1	1260
17452	LOTUS	MIX	Mix	LOTUSMIX38779	2006-09-25	F	27894	2006-03-03	2006-08-17	.	2.17	1	1261
16320	ZOEBELLE	PAP	Papillion	ZOEBELLEPAP38779	2006-09-07	F	44403	2006-03-03	2006-07-28	Toy	4.98	1	1262
16233	SAMMY	LAB	Labrador Retriever	SAMMYLAB38779	2006-09-07	M	48470	2006-03-03	2006-07-26	Large	4.14	1	1263
2426	LADY	MIN	Miniature Pinscher	LADYMIN38780	2007-02-08	F	50703	2006-03-04	2006-11-15	Toy	2.62	1	1264
15681	CASMIR	JRT	Jack Russell Terrier	CASMIRJRT38781	2006-08-28	M	12324	2006-03-05	2006-07-08	Small	3.45	1	1265
18098	DINO	SPO	Standard Poodle	DINOSPO38781	2006-10-09	M	17981	2006-03-05	2006-08-28	Large	3.45	1	1266
1828	PAMPLEMOUSSE	HAV	Havanese	PAMPLEMOUSSEHAV38781	2007-01-29	M	18658	2006-03-05	2006-06-12	Toy	0.38	0	1267
1476	TANGO	JRT	Jack Russell Terrier	TANGOJRT38781	2007-01-13	M	45736	2006-03-05	2006-07-30	Small	4.14	1	1268
15932	FANNIE	SUS	Sussex Spaniel	FANNIESUS38782	2006-08-29	F	13704	2006-03-06	2006-05-23	Medium	0.13	0	1269
19263	BAILEY	YRK	Yorkshire Terrier	BAILEYYRK38782	2006-10-31	M	21613	2006-03-06	2006-08-17	Toy	3.45	1	1270
14990	JAKE	LAB	Labrador Retriever	JAKELAB38782	2006-08-15	M	44948	2006-03-06	2006-07-15	Large	2.17	1	1271
2502	LUCY	SHI	Shih-tzu	LUCYSHI38782	2007-02-07	F	50513	2006-03-06	2007-01-16	Small	3.45	1	1272
21956	TRAMP			TRAMP38783	2006-12-16	M	18320	2006-03-07	2006-08-05	.	1.51	1	1273
15673	ROXY	TPO	Toy Poodle	ROXYTPO38783	2006-08-26	F	18601	2006-03-07	2006-07-26	Toy	2.76	1	1274
21636	SHEP	GER	German Shepard	SHEPGER38783	2006-12-08	F	27371	2006-03-07	2006-11-03	Large	4.14	1	1275
18244	TUBBY	MIX	Mix	TUBBYMIX38783	2006-10-12	M	42298	2006-03-07	2006-09-12	.	4.14	1	1276
2845	AFRO	POM	Pomeranian	AFROPOM38783	2007-02-12	M	51080	2006-03-07	2006-06-03	Toy	0.66	1	1277
15468	MICAH	SHT	Shetland Sheepdog	MICAHSHT38784	2006-08-23	M	37562	2006-03-08	2006-07-21	Small	1.51	1	1278
19510	BETTY	ROT	Rottweiler	BETTYROT38785	2006-11-01	F	50388	2006-03-09	2006-09-09	giant	0.17	0	1279
16691	BALTAZAR	FBD	French Bulldog	BALTAZARFBD38785	2006-08-28	M	63634	2006-03-09	2006-06-16	Small	0.38	0	1280
17402	FEDERICO	GLD	Golden Retriever	FEDERICOGLD38785	2006-09-18	M	67637	2006-03-09	2006-06-08	Large	0.87	1	1281
3025	HANA	SHB	Shiba-inu	HANASHB38786	2007-02-15	F	50899	2006-03-10	2007-01-15	Small	2.76	1	1282
1055	BORIS	JRT	Jack Russell Terrier	BORISJRT38786	2007-01-16	M	51610	2006-03-10	2006-12-07	Small	3.45	1	1283
13122	RAMBO	SHI	Shih-tzu	RAMBOSHI38786	2006-07-13	M	78991	2006-03-10	2006-05-30	Small	4.14	1	1284
18124	MILO	CHI	Chihuahua	MILOCHI38787	2006-10-06	F	17547	2006-03-11	2006-05-23	Toy	0.87	1	1285
13031	PURDEY	LAB	Labrador Retriever	PURDEYLAB38787	2006-07-12	F	26737	2006-03-11	2006-06-10	Large	4.14	1	1286
13031	MAGGIE	LAB	Labrador Retriever	MAGGIELAB38787	2006-07-12	F	26857	2006-03-11	2006-06-10	Large	2.62	1	1287
15485	MATISON	SAM	Samoyed	MATISONSAM38789	2006-08-18	F	42904	2006-03-13	2006-05-30	Medium	1.15	1	1288
13936	WYLEE	CCR	Chinese Crested	WYLEECCR38789	2006-07-27	M	43149	2006-03-13	2006-07-03	Toy	1.15	1	1289
20504	ROYAL TOURIST			ROYAL TOURIST38789	2006-11-21	M	49205	2006-03-13	2006-10-24	.	2.76	1	1290
896	HARLEY	SHT	Shetland Sheepdog	HARLEYSHT38789	2007-01-10	F	69343	2006-03-13	2006-05-28	Small	6.4	1	1292
18712	LEAH	BIC	Bichon Frise	LEAHBIC38790	2006-10-19	F	11980	2006-03-14	2006-08-16	Small	2.17	1	1293
15057	MAGNOLIA	SHI	Shih-tzu	MAGNOLIASHI38791	2006-08-14	F	25856	2006-03-15	2006-06-28	Small	0.38	0	1294
1036	BAUER	PUG	Pug	BAUERPUG38791	2007-01-16	M	26110	2006-03-15	2006-07-18	Small	0.29	0	1296
15494	BARNEY	SHI	Shih-tzu	BARNEYSHI38791	2006-08-23	M	43161	2006-03-15	2006-08-02	Small	2.76	1	1297
13990	PANDA	SHI	Shih-tzu	PANDASHI38791	2006-07-28	F	44342	2006-03-15	2006-06-20	Small	2.17	1	1298
15321	COCO	SCT	Scottish Terrier	COCOSCT38791	2006-08-18	F	46607	2006-03-15	2006-07-17	Small	1.75	1	1299
10742	KEIKI	SHT	Shetland Sheepdog	KEIKISHT38791	2006-06-07	F	46722	2006-03-15	2006-06-02	Small	4.14	1	1300
19022	OLIVE	LAB	Labrador Retriever	OLIVELAB38791	2006-10-21	F	49416	2006-03-15	2006-07-21	Large	1.38	1	1301
314	HENNA	POODLE	Poodle	HENNAPOODLE38792	2007-01-04	F	10526	2006-03-16	2006-04-10	.	2.62	1	1302
4474	HONEY BUN	DSM	Dachshund	HONEY BUNDSM38792	2007-03-03	F	47012	2006-03-16	2006-07-18	Small	0.38	0	1303
18048	MEG	SHI	Shih-tzu	MEGSHI38793	2006-10-10	F	11888	2006-03-17	2006-07-21	Small	2.76	1	1304
1733	MAIA	LAB	Labrador Retriever	MAIALAB38793	2007-01-26	F	45462	2006-03-17	2006-06-22	Large	0.13	0	1305
22489	BAILEY	LAB	Labrador Retriever	BAILEYLAB38793	2006-12-28	F	46468	2006-03-17	2006-12-07	Large	0.66	1	1306
15195	SAM	LAB	Labrador Retriever	SAMLAB38793	2006-08-18	M	49121	2006-03-17	2006-07-27	Large	2.76	1	1307
21095	SAM	MLT	Maltese	SAMMLT38793	2006-11-30	M	69401	2006-03-17	2006-07-17	Toy	1.99	1	1308
866	FIA	BOX	Boxer	FIABOX38794	2007-01-10	F	28099	2006-03-18	2006-09-05	Large	6.4	1	1309
12735	BASHA	BOUVIER	Bouvier Des Flandres	BASHABOUVIER38794	2006-07-10	F	42477	2006-03-18	2006-06-02	Large	4.14	1	1310
12735	OLIVIA	BOUVIER	Bouvier Des Flandres	OLIVIABOUVIER38794	2006-07-10	F	42650	2006-03-18	2006-06-02	Large	2.62	1	1311
14636	HANK	GER	German Shepard	HANKGER38794	2006-08-10	M	48569	2006-03-18	2006-07-18	Large	3.45	1	1312
1819	BUNNI			BUNNI38794	2007-01-28	F	79091	2006-03-18	2006-09-02	.	0.87	1	1313
14610	ABBY	PUG	Pug	ABBYPUG38795	2006-08-08	F	18460	2006-03-19	2006-07-11	Small	2.76	1	1314
17681	ABBY	SAM	Samoyed	ABBYSAM38795	2006-10-03	F	28028	2006-03-19	2006-09-20	Medium	2.76	1	1315
15943	CHIA	YRK	Yorkshire Terrier	CHIAYRK38795	2006-08-31	F	49515	2006-03-19	2006-07-14	Toy	3.45	1	1316
20818	HANA	LAB	Labrador Retriever	HANALAB38796	2006-11-27	F	12539	2006-03-20	2006-10-24	Large	4.14	1	1317
21302	JACK	LAB	Labrador Retriever	JACKLAB38796	2006-12-05	M	18267	2006-03-20	2006-06-27	Large	0.1	0	1318
5147	ELLA	KEESHOUND	Keeshond	ELLAKEESHOUND38796	2007-03-14	F	42490	2006-03-20	2007-02-19	Medium	2.17	1	1319
16145	DENNI	POM	Pomeranian	DENNIPOM38796	2006-09-01	M	46100	2006-03-20	2006-06-25	Toy	3.45	1	1320
3454	149	CSH	Chihuahua	149CSH38796	2007-02-21	F	47470	2006-03-20	2007-02-04	Toy	4.14	1	1321
21102	BONNIE	EBD	English Bulldog	BONNIEEBD38797	2006-11-28	F	27664	2006-03-21	2006-08-23	Medium	1.51	1	1322
13991	SEAN OG	LAB	Labrador Retriever	SEAN OGLAB38797	2006-07-28	M	47697	2006-03-21	2006-06-28	Large	2.17	1	1323
17587	MAIZY	MIX	Mix	MAIZYMIX38797	2006-09-29	F	48966	2006-03-21	2006-09-09	.	2.17	1	1324
20537	COCO	PEK	Pekingese	COCOPEK38797	2006-11-20	F	77481	2006-03-21	2006-10-16	Toy	0.87	1	1325
20537	RACO	PEK	Pekingese	RACOPEK38797	2006-11-20	F	77517	2006-03-21	2006-10-16	Toy	2.76	1	1326
16081	TONKA	MPO	Miniature Poodle	TONKAMPO38798	2006-09-05	M	9469	2006-03-22	2006-08-01	Small	3.45	1	1327
14444	SOPHIE	DSC	Dachshund	SOPHIEDSC38798	2006-08-07	F	18216	2006-03-22	2006-07-18	Small	1.51	1	1328
18291	PAKA	BOS	Boston Terrier	PAKABOS38798	2006-10-13	M	44268	2006-03-22	2006-06-19	Small	0.29	0	1329
531	MANNY	ROT	Rottweiler	MANNYROT38798	2007-01-08	M	48647	2006-03-22	2006-12-18	giant	4.98	1	1330
4735	SHOTZEE	SHI	Shih-tzu	SHOTZEESHI38799	2007-03-09	F	12567	2006-03-23	2006-08-04	Small	4.98	1	1331
17403	GRACE	MIX	Mix	GRACEMIX38799	2006-09-27	F	18184	2006-03-23	2006-09-13	.	4.98	1	1332
3454	353	CSH	Chihuahua	353CSH38799	2007-02-21	F	48279	2006-03-23	2007-02-04	Toy	4.14	1	1333
15526	CHACHO	CSH	Chihuahua	CHACHOCSH38799	2006-08-24	M	49187	2006-03-23	2006-07-29	Toy	2.76	1	1334
21294	MARTY	BEA	Beagle	MARTYBEA38799	2006-11-30	M	69563	2006-03-23	2006-07-22	Small	1.99	1	1335
18775	MEL			MEL38800	2006-10-20	M	23394	2006-03-24	2006-09-06	.	1.51	1	1336
18775	DEE			DEE38800	2006-10-20	F	23412	2006-03-24	2006-09-06	.	2.76	1	1337
18775	LEX			LEX38800	2006-10-20	M	23609	2006-03-24	2006-09-06	.	2.76	1	1338
14764	ADDISON	GLD	Golden Retriever	ADDISONGLD38800	2006-08-14	F	24456	2006-03-24	2006-07-21	Large	4.98	1	1339
20794	EMILY	CSH	Chihuahua	EMILYCSH38800	2006-11-28	F	27656	2006-03-24	2006-07-28	Toy	0.38	0	1340
15137	GRACIE	PEI	Shar-pei	GRACIEPEI38800	2006-08-11	F	47539	2006-03-24	2006-07-11	Medium	1.99	1	1342
14631	MIC	TPO	Toy Poodle	MICTPO38800	2006-08-08	M	47971	2006-03-24	2006-06-02	Toy	3.45	1	1343
15526	CONCHITA	CSH	Chihuahua	CONCHITACSH38800	2006-08-24	F	48464	2006-03-24	2006-07-29	Toy	2.76	1	1344
20369	HIAYRE'S MAGIC MIRACLE	BSH	Belgian Sheepdog	HIAYRE'S MAGIC MIRACLEBSH38801	2006-11-15	F	64627	2006-03-25	2006-06-29	Large	4.14	1	1345
20942	ANGEL	MLT	Maltese	ANGELMLT38802	2006-11-29	F	18648	2006-03-26	2006-07-26	Toy	0.1	0	1346
14416	AURO	GLD	Golden Retriever	AUROGLD38802	2006-08-05	M	21385	2006-03-26	2006-06-01	Large	4.98	1	1347
19103	KOA	BOX	Boxer	KOABOX38802	2006-10-24	M	42592	2006-03-26	2006-05-19	Large	1.38	1	1348
855	LEILANI	MIS	Miniature Schnauzer	LEILANIMIS38802	2007-01-11	F	49182	2006-03-26	2006-12-11	Small	6.4	1	1349
5107	LILO	FPO	French Poodle	LILOFPO38803	2007-03-09	F	9643	2006-03-27	2006-07-15	.	0.07	0	1350
2919	MERLIN	BIC	Bichon Frise	MERLINBIC38803	2007-02-13	M	11625	2006-03-27	2007-01-04	Small	2.76	1	1351
15259		SHI	Shih-tzu	SHI38803	2006-08-16	M	18039	2006-03-27	2006-06-26	Small	1.75	1	1352
5780	MOLLY	BIC	Bichon Frise	MOLLYBIC38803	2007-03-20	F	47167	2006-03-27	2006-07-17	Small	0.38	0	1353
149	ROSIE	LAB	Labrador Retriever	ROSIELAB38803	2007-01-01	F	47725	2006-03-27	2006-10-10	Large	4.56	1	1354
15825	ABBY	LAB	Labrador Retriever	ABBYLAB38803	2006-08-29	F	64092	2006-03-27	2006-06-28	Large	4.14	1	1355
20593	RIN RIN	DOB	Doberman Pinscher	RIN RINDOB38803	2006-11-21	M	67199	2006-03-27	2006-10-06	Large	1.75	1	1356
5083	BARTOK	PUG	Pug	BARTOKPUG38804	2007-03-15	M	14144	2006-03-28	2006-07-19	Small	3.45	1	1357
20538	SHADY	SHT	Shetland Sheepdog	SHADYSHT38804	2006-11-21	F	17648	2006-03-28	2006-07-19	Small	0.66	1	1358
19114	LUCKY	YRK	Yorkshire Terrier	LUCKYYRK38804	2006-10-25	M	18559	2006-03-28	2006-09-06	Toy	1.38	1	1359
20304	ALEX	CCR	Chinese Crested	ALEXCCR38804	2006-11-15	F	27529	2006-03-28	2006-07-27	Toy	2.76	1	1360
19754	SUNDANCE	KEE	Keeshond	SUNDANCEKEE38804	2006-11-07	F	47741	2006-03-28	2006-07-05	Medium	4.98	1	1361
3454	A78	CSH	Chihuahua	A78CSH38804	2007-02-21	F	48034	2006-03-28	2007-02-04	Toy	4.14	1	1362
16233	JACOB	LAB	Labrador Retriever	JACOBLAB38804	2006-09-07	M	49312	2006-03-28	2006-07-26	Large	4.14	1	1363
2160	FRANCESCA	COC	Cocker Spaniel	FRANCESCACOC38804	2007-02-02	F	51687	2006-03-28	2006-08-17	Small	2.62	1	1364
940	SUIE	MIX	Mix	SUIEMIX38804	2007-01-08	F	64665	2006-03-28	2006-10-25	.	6.4	1	1365
16139	LUNA	STS	Standard Schnauzer	LUNASTS38804	2006-08-31	F	67196	2006-03-28	2006-07-15	Medium	1.15	1	1366
15462	KAIAH	ROT	Rottweiler	KAIAHROT38805	2006-08-21	F	45757	2006-03-29	2006-07-27	giant	4.56	1	1367
17501	STELLA	BIC	Bichon Frise	STELLABIC38806	2006-09-23	F	10337	2006-03-30	2006-07-10	Small	0.5	1	1368
18134	COOPER	FBD	French Bulldog	COOPERFBD38806	2006-10-10	M	27755	2006-03-30	2006-09-19	Small	3.45	1	1369
16500	TANGO	MIX	Mix	TANGOMIX38806	2006-09-11	M	47333	2006-03-30	2006-08-10	.	2.76	1	1370
2540	BRITTANY	SPO	Standard Poodle	BRITTANYSPO38806	2007-02-08	F	47570	2006-03-30	2007-01-05	Large	3.45	1	1371
20201	COCO	CSH	Chihuahua	COCOCSH38807	2006-11-16	F	24492	2006-03-31	2006-07-06	Toy	2.62	1	1372
18908	WIGGLES	DSM	Dachshund	WIGGLESDSM38807	2006-10-24	F	49899	2006-03-31	2006-07-24	Small	0.22	0	1373
20360	GRACIE	CSH	Chihuahua	GRACIECSH38807	2006-11-21	F	50471	2006-03-31	2006-10-30	Toy	4.14	1	1374
18570	POLO	CSH	Chihuahua	POLOCSH38808	2006-10-14	M	9185	2006-04-01	2006-07-17	Toy	3.45	1	1375
3816	CHURCHILL	LAB	Labrador Retriever	CHURCHILLLAB38808	2007-02-27	M	12152	2006-04-01	2007-01-29	Large	2.76	1	1376
21835	PUPPY	PIT	Pitbull Terrier	PUPPYPIT38808	2006-12-13	F	18639	2006-04-01	2006-09-05	Medium	1.51	1	1377
21106	ACE	YRK	Yorkshire Terrier	ACEYRK38808	2006-12-01	M	22911	2006-04-01	2006-09-28	Toy	4.14	1	1378
15622	LACEY	MIN	Miniature Pinscher	LACEYMIN38808	2006-08-17	F	23674	2006-04-01	2006-08-03	Toy	0.87	1	1379
20775	LUCKY	MIX	Mix	LUCKYMIX38808	2006-11-27	M	27118	2006-04-01	2006-09-27	.	0.87	1	1380
22204	MOXIE	BEA	Beagle	MOXIEBEA38808	2006-12-19	F	28681	2006-04-01	2006-10-13	Small	3.45	1	1381
13077	SAM	GLD	Golden Retriever	SAMGLD38808	2006-07-14	M	48065	2006-04-01	2006-07-01	Large	0	0	1382
15477	BRIDGET	LAB	Labrador Retriever	BRIDGETLAB38808	2006-08-23	F	48778	2006-04-01	2006-07-11	Large	2.76	1	1383
3650	BEAR	LAB	Labrador Retriever	BEARLAB38808	2007-02-24	M	49356	2006-04-01	2007-01-22	Large	4.14	1	1384
19446	SOL	MIX	Mix	SOLMIX38808	2006-10-30	M	49549	2006-04-01	2006-09-30	.	4.98	1	1385
19629	JACK	JRT	Jack Russell Terrier	JACKJRT38808	2006-11-04	M	50243	2006-04-01	2006-09-02	Small	4.14	1	1386
21780	ANGELO	BIC	Bichon Frise	ANGELOBIC38808	2006-12-12	M	50266	2006-04-01	2006-11-29	Small	2.76	1	1387
1242	RAFFLES	MIX	Mix	RAFFLESMIX38808	2007-01-19	M	62900	2006-04-01	2006-12-08	.	3.45	1	1388
5402	OLIVER	RAT	Rat Terrier	OLIVERRAT38809	2007-03-15	M	26021	2006-04-02	2006-08-23	Small	0.04	0	1389
21682	BILLY	POM	Pomeranian	BILLYPOM38809	2006-12-12	M	43460	2006-04-02	2006-11-13	Toy	4.14	1	1390
21682	BOBBY	MIX	Mix	BOBBYMIX38809	2006-12-12	M	43725	2006-04-02	2006-11-13	.	4.14	1	1391
14917	NO NAME YET MALE	POM	Pomeranian	NO NAME YET MALEPOM38809	2006-08-14	M	46647	2006-04-02	2006-07-24	Toy	1.75	1	1392
16689	PEKOE	TPO	Toy Poodle	PEKOETPO38809	2006-09-02	F	66162	2006-04-02	2006-07-29	Toy	4.14	1	1393
5001	TORSTEN	PUG	Pug	TORSTENPUG38809	2007-03-12	M	67235	2006-04-02	2006-08-22	Small	3.45	1	1394
14497	MAX	HAV	Havanese	MAXHAV38810	2006-08-07	M	22977	2006-04-03	2006-06-26	Toy	3.45	1	1395
15169	PUPPY 1	TPO	Toy Poodle	PUPPY 1TPO38811	2006-08-18	F	21253	2006-04-04	2006-07-28	Toy	1.51	1	1396
16542	MONICA	FCR	Flat Coat Retriever	MONICAFCR38811	2006-09-13	F	46780	2006-04-04	2006-07-07	Large	0.1	0	1397
22189	ZIRCON	MIX	Mix	ZIRCONMIX38811	2006-12-18	M	66721	2006-04-04	2006-10-28	.	0.05	0	1398
22189	ONYX	MIX	Mix	ONYXMIX38811	2006-12-18	M	66752	2006-04-04	2006-10-28	.	0.07	0	1399
1905	KYRRA	GLD	Golden Retriever	KYRRAGLD38811	2007-01-27	F	79411	2006-04-04	2006-08-17	Large	2.17	1	1400
14356	RED ANNIE	BMS	Mastiff	RED ANNIEBMS38812	2006-08-04	F	14668	2006-04-05	2006-06-30	giant	1.99	1	1401
2070	JOSIE			JOSIE38812	2007-02-01	F	16455	2006-04-05	2007-01-11	.	2.17	1	1402
16276	SISTER	FBD	French Bulldog	SISTERFBD38812	2006-09-07	F	17859	2006-04-05	2006-08-01	Small	4.14	1	1403
2736	STRYDER	DOB	Doberman Pinscher	STRYDERDOB38812	2007-02-13	M	27552	2006-04-05	2007-01-11	Large	4.14	1	1404
4646	ROMEL	DOB	Doberman Pinscher	ROMELDOB38812	2007-03-09	M	38216	2006-04-05	2006-06-28	Large	0.66	1	1405
15213	PEE WEE	BIC	Bichon Frise	PEE WEEBIC38812	2006-08-09	M	46351	2006-04-05	2006-07-17	Small	2.76	1	1406
20537	KUJO	MIX	Mix	KUJOMIX38812	2006-11-20	M	77471	2006-04-05	2006-10-16	.	2.76	1	1407
21729	ZERA	LAB	Labrador Retriever	ZERALAB38813	2006-12-12	M	27562	2006-04-06	2006-11-30	Large	2.76	1	1408
5103	COCOA	LAB	Labrador Retriever	COCOALAB38813	2007-03-14	F	47231	2006-04-06	2007-03-02	Large	3.45	1	1409
250	JOE	MIN	Miniature Pinscher	JOEMIN38813	2007-01-03	M	51904	2006-04-06	2006-08-14	Toy	4.14	1	1410
21650	TEDDY	MIX	Mix	TEDDYMIX38813	2006-12-07	F	66646	2006-04-06	2006-08-08	.	1.99	1	1411
185	ADIE	MIX	Mix	ADIEMIX38813	2007-01-02	F	69475	2006-04-06	2006-08-29	.	4.14	1	1412
5120	HONEY	SCT	Scottish Terrier	HONEYSCT38814	2007-03-14	F	26470	2006-04-07	2007-02-21	Small	2.17	1	1413
16572	MONET	BIC	Bichon Frise	MONETBIC38814	2006-09-12	M	28013	2006-04-07	2006-08-21	Small	3.45	1	1414
19660	RANGER	CRN	Cairn Terrier	RANGERCRN38814	2006-11-07	F	46856	2006-04-07	2006-07-28	Small	4.14	1	1415
18389	SAKURA	WEA	Wheaten Terrier	SAKURAWEA38814	2006-10-13	F	47747	2006-04-07	2006-09-13	Medium	2.17	1	1416
15170	PUPPY 2	TPO	Toy Poodle	PUPPY 2TPO38815	2006-08-18	F	21236	2006-04-08	2006-07-28	Toy	1.51	1	1417
15531	MOLLY	STD	Standard Poodle	MOLLYSTD38815	2006-08-23	F	41634	2006-04-08	2006-07-13	Large	2.76	1	1418
15521	MAGGIE	SPO	Standard Poodle	MAGGIESPO38815	2006-08-23	F	42132	2006-04-08	2006-07-12	Large	2.76	1	1419
15531	ABBY	STD	Standard Poodle	ABBYSTD38815	2006-08-23	F	42139	2006-04-08	2006-07-13	Large	2.76	1	1420
15230	SOPHIE	KCS	King Charles Spaniel	SOPHIEKCS38815	2006-08-21	F	48767	2006-04-08	2006-07-18	Toy	1.51	1	1421
19485	BRITAIN	CSH	Chihuahua	BRITAINCSH38815	2006-10-30	F	48984	2006-04-08	2006-08-04	Toy	1.51	1	1422
20851	MONTY	CBR	Chesapeake Bay Retriever	MONTYCBR38815	2006-11-16	M	77980	2006-04-08	2006-07-28	Large	4.14	1	1423
14660	INDI	CSH	Chihuahua	INDICSH38816	2006-08-09	M	48287	2006-04-09	2006-07-10	Toy	3.45	1	1424
18783	PIKAKE	COC	Cocker Spaniel	PIKAKECOC38816	2006-10-19	F	49113	2006-04-09	2006-07-27	Small	0.66	1	1425
16260	COPPER	MIX	Mix	COPPERMIX38817	2006-09-07	M	12394	2006-04-10	2006-06-30	.	4.14	1	1426
1673	ACE	MIN	Miniature Pinscher	ACEMIN38817	2007-01-26	M	18700	2006-04-10	2006-12-13	Toy	1.75	1	1427
649	PEPSI	POM	Pomeranian	PEPSIPOM38817	2007-01-10	M	27024	2006-04-10	2006-08-14	Toy	0.5	1	1428
3454	F77	CSH	Chihuahua	F77CSH38817	2007-02-21	F	48566	2006-04-10	2007-02-04	Toy	4.14	1	1429
13884	LIBERTY			LIBERTY38818	2006-07-26	F	16430	2006-04-11	2006-07-12	.	4.98	1	1431
3213	RAH	AUS	Australian Terrier	RAHAUS38818	2007-02-19	F	22639	2006-04-11	2006-08-30	Toy	0.1	0	1432
17532	BEAR	ROT	Rottweiler	BEARROT38818	2006-09-27	M	23310	2006-04-11	2006-08-04	giant	1.15	1	1433
22034	MY GIRL	BAS	Basset Hound	MY GIRLBAS38818	2006-12-18	F	36382	2006-04-11	2006-08-11	Small	0.66	1	1434
4190	YODA	FBD	French Bulldog	YODAFBD38818	2007-03-01	M	46995	2006-04-11	2007-02-22	Small	2.17	1	1435
16542	RIN	BOR	Border Collie	RINBOR38818	2006-09-13	F	47120	2006-04-11	2006-07-07	Medium	0.29	0	1436
20261	COOKIE	MIX	Mix	COOKIEMIX38818	2006-11-15	F	48641	2006-04-11	2006-09-05	.	2.76	1	1437
15096	ALII	LAB	Labrador Retriever	ALIILAB38819	2006-08-14	F	14868	2006-04-12	2006-07-07	Large	3.45	1	1438
15510	CHARA			CHARA38819	2006-08-23	F	45147	2006-04-12	2006-07-24	.	2.76	1	1439
2206	COOPER GASTON	BOX	Boxer	COOPER GASTONBOX38819	2007-02-05	M	47591	2006-04-12	2006-08-17	Large	1.15	1	1440
20688	ELLA	PWD	Portugese Water Dog	ELLAPWD38819	2006-11-24	F	49015	2006-04-12	2006-10-24	Medium	4.98	1	1441
19234	CHIQUITA	CSH	Chihuahua	CHIQUITACSH38820	2006-10-28	F	11912	2006-04-13	2006-09-08	Toy	4.98	1	1442
1136	DANDEE	PEM	Corgi	DANDEEPEM38820	2007-01-11	M	68957	2006-04-13	2006-07-04	Small	1.99	1	1443
7242	JACKSON	MIS	Miniature Schnauzer	JACKSONMIS38821	2007-04-11	M	16295	2006-04-14	2006-07-26	Small	1.99	1	1444
1633	STOLI	MIX	Mix	STOLIMIX38822	2007-01-13	M	16558	2006-04-15	2006-12-04	.	1.75	1	1445
17246	SHADOW	KCS	King Charles Spaniel	SHADOWKCS38822	2006-09-23	F	22407	2006-04-15	2006-08-02	Toy	1.51	1	1446
1406	TODDY	AUS	Australian Terrier	TODDYAUS38822	2007-01-22	M	26051	2006-04-15	2006-12-19	Toy	4.14	1	1447
5440	ROCCO	ROT	Rottweiler	ROCCOROT38822	2007-03-16	M	27823	2006-04-15	2006-07-28	giant	1.15	1	1448
15561	CHUEY	EBD	English Bulldog	CHUEYEBD38822	2006-08-25	M	42711	2006-04-15	2006-08-04	Medium	2.76	1	1449
14328	KOBY	CSH	Chihuahua	KOBYCSH38822	2006-07-29	M	47340	2006-04-15	2006-07-14	Toy	4.98	1	1450
3899	NEMO	GER	German Shepard	NEMOGER38822	2007-02-28	M	47718	2006-04-15	2007-01-09	Large	6.4	1	1451
21723	KITTERY	WHP	Whippet	KITTERYWHP38822	2006-12-12	F	50226	2006-04-15	2006-08-02	Medium	2.76	1	1452
17985	FOO	YRK	Yorkshire Terrier	FOOYRK38822	2006-10-06	M	50249	2006-04-15	2006-08-15	Toy	2.76	1	1453
6635	MAGGIE	MIX	Mix	MAGGIEMIX38822	2007-03-02	F	66855	2006-04-15	2006-08-18	.	0.66	1	1454
3081	ROXY	MIN	Miniature Pinscher	ROXYMIN38823	2007-02-12	F	13770	2006-04-16	2006-08-14	Toy	3.45	1	1455
20631	BAMBI	CSH	Chihuahua	BAMBICSH38823	2006-11-07	F	47307	2006-04-16	2006-09-01	Toy	1.75	1	1456
19264	WHITIE	FBD	French Bulldog	WHITIEFBD38824	2006-10-30	M	43366	2006-04-17	2006-07-12	Small	0.38	0	1457
14064	WRINKLED FACE	FBD	French Bulldog	WRINKLED FACEFBD38824	2006-08-01	M	43647	2006-04-17	2006-07-12	Small	6.01	1	1459
19245	MAKI-KILO	MIN	Miniature Pinscher	MAKI-KILOMIN38825	2006-10-30	M	28437	2006-04-18	2006-07-17	Toy	1.51	1	1460
19589	COSMO			COSMO38825	2006-11-04	F	47203	2006-04-18	2006-10-06	.	4.14	1	1461
1931	MURDOCK	EBD	English Bulldog	MURDOCKEBD38825	2007-01-30	M	51140	2006-04-18	2006-08-15	Medium	2.17	1	1462
3035	ISLAND FARMS'S ALIBI	ANA	Anatolian Shepard	ISLAND FARMS'S ALIBIANA38826	2007-02-14	F	23073	2006-04-19	2006-09-11	giant	1.15	1	1463
21485	RIPSNORTER'S PARTY GIRL DARNELLE	QMP	German Wirehaired Pointer	RIPSNORTER'S PARTY GIRL DARNELLEQMP38826	2006-12-07	F	41921	2006-04-19	2006-11-06	Large	3.45	1	1464
20552	ALANA	GLD	Golden Retriever	ALANAGLD38827	2006-11-22	F	21535	2006-04-20	2006-07-22	Large	2.76	1	1465
15006	VOGUE	MAL	Alaskan Malamute	VOGUEMAL38827	2006-08-16	F	26814	2006-04-20	2006-07-25	Large	2.17	1	1466
17036	SIDNEY	GER	German Shepard	SIDNEYGER38827	2006-09-20	M	48246	2006-04-20	2006-07-24	Large	4.14	1	1467
17675	GUCCI	ITI	Italian Grey Hound	GUCCIITI38827	2006-10-02	F	49208	2006-04-20	2006-08-22	Toy	2.76	1	1468
19565	MR. SHEFFIELD	KCS	King Charles Spaniel	MR. SHEFFIELDKCS38827	2006-10-28	M	49458	2006-04-20	2006-10-14	Toy	4.14	1	1469
6679	BECKHAM	MLT	Maltese	BECKHAMMLT38828	2007-04-02	M	48665	2006-04-21	2006-08-25	Toy	1.99	1	1470
407	KENAI	AFF	Affenpinscher	KENAIAFF38828	2007-01-04	M	49385	2006-04-21	2006-08-24	Toy	1.99	1	1471
12808	SPANKY	CSH	Chihuahua	SPANKYCSH38829	2006-07-10	F	22463	2006-04-22	2006-06-09	Toy	4.14	1	1472
17853	MOON MOO	PAP	Papillion	MOON MOOPAP38829	2006-10-04	F	49528	2006-04-22	2006-08-12	Toy	2.17	1	1473
596	KATIE	WES	West Highland Terrier	KATIEWES38830	2007-01-08	F	48344	2006-04-23	2006-08-21	Small	1.99	1	1474
20237	DUDLEY	SHI	Shih-tzu	DUDLEYSHI38830	2006-11-15	M	49555	2006-04-23	2006-11-06	Small	3.45	1	1475
21216	LITTLE ONE	YRK	Yorkshire Terrier	LITTLE ONEYRK38831	2006-11-30	F	16598	2006-04-24	2006-09-01	Toy	4.14	1	1476
15878	MINI MINI MOUSE	CSH	Chihuahua	MINI MINI MOUSECSH38831	2006-08-30	F	17964	2006-04-24	2006-07-24	Toy	3.45	1	1477
18597	CARVER	SHI	Shih-tzu	CARVERSHI38831	2006-10-19	M	45689	2006-04-24	2006-09-28	Small	1.99	1	1478
1392	MICKEY	LAB	Labrador Retriever	MICKEYLAB38831	2007-01-19	M	62744	2006-04-24	2006-11-28	Large	3.45	1	1479
18712	AIDEN	BIC	Bichon Frise	AIDENBIC38833	2006-10-19	M	12009	2006-04-26	2006-09-19	Small	2.17	1	1480
19756	APRIL	SHB	Shiba-inu	APRILSHB38833	2006-11-08	F	14736	2006-04-26	2006-07-10	Small	1.99	1	1481
4170	LILO	MIX	Mix	LILOMIX38834	2007-03-02	F	8622	2006-04-27	2007-02-12	.	2.17	1	1482
1315	DIXIE	CHI	Chihuahua	DIXIECHI38834	2007-01-18	F	26031	2006-04-27	2006-09-15	Toy	3.45	1	1483
1315	MICKEY	CHI	Chihuahua	MICKEYCHI38834	2007-01-18	M	26072	2006-04-27	2006-09-15	Toy	3.45	1	1484
4716	RIVER	BRT	Brittany Spaniel	RIVERBRT38834	2007-03-03	F	44123	2006-04-27	2007-01-20	Medium	1.51	1	1485
4716	BRANDI	BRT	Brittany Spaniel	BRANDIBRT38834	2007-03-03	M	44926	2006-04-27	2007-01-20	Medium	1.15	1	1486
16252	SANDOR	BOERBEOL	Boerboel	SANDORBOERBEOL38834	2006-09-05	M	47478	2006-04-27	2006-08-05	giant	4.14	1	1487
17042	ERNIE	GRT	Great Dane	ERNIEGRT38834	2006-09-19	M	48372	2006-04-27	2006-09-05	giant	4.14	1	1488
17155	JESTER	DSW	Dachshund	JESTERDSW38834	2006-09-20	M	64039	2006-04-27	2006-08-28	Small	4.14	1	1489
17164	MAVERICK	SIB	Siberian Husky	MAVERICKSIB38835	2006-09-21	M	27542	2006-04-28	2006-08-10	Medium	2.76	1	1491
18726	ANGUS	MIX	Mix	ANGUSMIX38835	2006-10-19	M	45508	2006-04-28	2006-08-17	.	2.17	1	1492
4306	LYUBA	SIB	Siberian Husky	LYUBASIB38835	2007-03-04	F	48898	2006-04-28	2006-10-07	Medium	3.45	1	1493
21006	CINDY	BER	Bernese Mountain Dog	CINDYBER38836	2006-11-28	F	18177	2006-04-29	2006-09-16	Large	1.75	1	1494
6167	HAPPY	SHI	Shih-tzu	HAPPYSHI38838	2007-03-27	F	11731	2006-05-01	2007-03-16	Small	2.62	1	1495
17936	PUPPY 1	ROT	Rottweiler	PUPPY 1ROT38838	2006-10-06	M	11810	2006-05-01	2006-09-08	giant	2.62	1	1496
17936	PUPPY 2	ROT	Rottweiler	PUPPY 2ROT38838	2006-10-06	F	11814	2006-05-01	2006-09-08	giant	4.98	1	1497
16491	PJ	COC	Cocker Spaniel	PJCOC38838	2006-09-12	M	12001	2006-05-01	2006-08-08	Small	1.51	1	1498
2207	CUDA	LAB	Labrador Retriever	CUDALAB38838	2007-02-06	F	14164	2006-05-01	2007-01-22	Large	4.14	1	1499
21944	MUSASHI	PAP	Papillion	MUSASHIPAP38838	2006-12-18	M	21567	2006-05-01	2006-11-19	Toy	3.45	1	1500
891	RUFUS CANNIBAL	MIX	Mix	RUFUS CANNIBALMIX38838	2007-01-12	M	22383	2006-05-01	2006-12-22	.	4.56	1	1501
17416	JAKE	MIX	Mix	JAKEMIX38838	2006-09-27	M	22502	2006-05-01	2006-09-08	.	1.51	1	1502
19585	MONTY	MIX	Mix	MONTYMIX38838	2006-11-06	M	27770	2006-05-01	2006-10-05	.	4.14	1	1503
17808	SAN JO'S BORN TO PARTY	COC	Cocker Spaniel	SAN JO'S BORN TO PARTYCOC38838	2006-10-03	M	41708	2006-05-01	2006-08-21	Small	2.17	1	1504
21955	B-LEE TICKET TO TEMPTATION	SPI	Shar-pei	B-LEE TICKET TO TEMPTATIONSPI38838	2006-12-15	M	42391	2006-05-01	2006-11-18	Medium	3.45	1	1505
20864	KOA	LAB	Labrador Retriever	KOALAB38838	2006-11-28	M	46823	2006-05-01	2006-11-03	Large	4.14	1	1506
22378	MOKUEA	LAB	Labrador Retriever	MOKUEALAB38838	2006-12-21	M	50500	2006-05-01	2006-09-15	Large	0.38	0	1507
15623	JAKE	EBD	English Bulldog	JAKEEBD38838	2006-08-23	M	64558	2006-05-01	2006-07-26	Medium	0.87	1	1509
3506	SCOOBY-DO			SCOOBY-DO38839	2007-02-21	F	15696	2006-05-02	2007-01-29	.	3.45	1	1510
20620	OPHELIE	DSM	Dachshund	OPHELIEDSM38840	2006-11-22	F	16640	2006-05-03	2006-11-11	Small	0.05	0	1511
21734	TINOSH	POM	Pomeranian	TINOSHPOM38840	2006-12-12	M	26774	2006-05-03	2006-07-31	Toy	0.38	0	1512
18689	JAXSON	ROT	Rottweiler	JAXSONROT38840	2006-10-19	M	47599	2006-05-03	2006-09-05	giant	2.17	1	1513
538	KEILA	MIS	Miniature Schnauzer	KEILAMIS38840	2007-01-08	F	51225	2006-05-03	2006-11-27	Small	4.98	1	1514
19026	ELLA	LAB	Labrador Retriever	ELLALAB38842	2006-10-25	F	12428	2006-05-05	2006-07-27	Large	0.38	0	1515
18441	BRANDY	SPO	Standard Poodle	BRANDYSPO38842	2006-10-14	M	45725	2006-05-05	2006-08-22	Large	1.38	1	1516
21665	TAZ	YRK	Yorkshire Terrier	TAZYRK38842	2006-12-08	M	49732	2006-05-05	2006-08-28	Toy	0.38	0	1517
1131	EVERREADY	CSH	Chihuahua	EVERREADYCSH38843	2007-01-12	M	15362	2006-05-06	2006-11-12	Toy	4.14	1	1518
14969	BELLA	CSH	Chihuahua	BELLACSH38843	2006-08-16	F	47266	2006-05-06	2006-07-27	Toy	2.17	1	1519
3630	KAIRI	YRK	Yorkshire Terrier	KAIRIYRK38844	2007-02-22	F	33862	2006-05-07	2006-11-15	Toy	4.14	1	1520
2639	ALLAGANTE 4 KARAT DIAMOND			ALLAGANTE 4 KARAT DIAMOND38844	2007-02-11	F	69614	2006-05-07	2007-01-20	.	4.14	1	1521
18041	TURBO			TURBO38845	2006-10-09	M	48943	2006-05-08	2006-09-22	.	2.76	1	1522
21019	BIRNA	CCR	Chinese Crested	BIRNACCR38846	2006-11-22	F	12148	2006-05-09	2006-09-01	Toy	4.14	1	1523
18515	SAILOR	CSH	Chihuahua	SAILORCSH38847	2006-10-16	M	12793	2006-05-10	2006-10-10	Toy	1.99	1	1524
186	BELLA	JRT	Jack Russell Terrier	BELLAJRT38847	2006-12-29	F	21359	2006-05-10	2006-12-15	Small	4.14	1	1525
5783	JUNE	SPO	Standard Poodle	JUNESPO38847	2007-03-20	M	33804	2006-05-10	2007-02-15	Large	2.17	1	1526
15656	SPOOK	EBD	English Bulldog	SPOOKEBD38847	2006-08-24	M	42491	2006-05-10	2006-08-02	Medium	2.76	1	1527
21148	SASHA	GER	German Shepard	SASHAGER38848	2006-12-02	F	46841	2006-05-11	2006-08-29	Large	0.29	0	1528
17477	MAXX	LAB	Labrador Retriever	MAXXLAB38848	2006-09-25	M	67474	2006-05-11	2006-08-22	Large	0.38	0	1529
8004	ROCKY			ROCKY38849	2007-04-24	M	16491	2006-05-12	2007-04-14	.	3.45	1	1530
1028	MAYBELLE	ABD	Bulldog	MAYBELLEABD38850	2007-01-15	F	51598	2006-05-13	2006-12-08	Large	0.66	1	1531
424	WILLOW	BAS	Basset Hound	WILLOWBAS38850	2007-01-05	F	69422	2006-05-13	2006-09-06	Small	1.51	1	1532
17701	SALLY	CAI	Cairn Terrier	SALLYCAI38851	2006-10-03	F	22815	2006-05-14	2006-09-12	Small	2.76	1	1533
7823	CHASE	WFT	Fox Terrier	CHASEWFT38851	2007-04-21	M	27393	2006-05-14	2007-03-21	Small	3.45	1	1534
2541	CABRYN COCOA KRISPIE	TPO	Toy Poodle	CABRYN COCOA KRISPIETPO38851	2007-02-09	M	27866	2006-05-14	2007-01-08	Toy	3.45	1	1535
4494	POLO'S GRAND ANN	AFG	Afghan Hound	POLO'S GRAND ANNAFG38851	2007-03-06	F	66947	2006-05-14	2007-01-30	Large	2.76	1	1536
19070	HOUND	MIX	Mix	HOUNDMIX38852	2006-10-23	F	11984	2006-05-15	2006-09-21	.	1.38	1	1539
2188	BUCKEROO	DPO	Poodle	BUCKEROODPO38852	2007-02-02	M	13186	2006-05-15	2006-11-20	.	4.14	1	1540
6841	RILEY	JRT	Jack Russell Terrier	RILEYJRT38852	2007-04-06	M	48229	2006-05-15	2006-11-08	Small	0.5	1	1542
5891	HARLEY	SAL	Saluki	HARLEYSAL38852	2007-03-26	M	50483	2006-05-15	2006-11-24	Large	1.99	1	1543
5392	HUMMER	POM	Pomeranian	HUMMERPOM38852	2007-03-13	M	64065	2006-05-15	2006-10-02	Toy	0.05	0	1544
20748	HITCH	RAT	Rat Terrier	HITCHRAT38853	2006-11-25	M	18544	2006-05-16	2006-09-12	Small	2.62	1	1545
19477	LYA	SIB	Siberian Husky	LYASIB38853	2006-11-02	F	19659	2006-05-16	2006-10-11	Medium	3.45	1	1546
22253	SCOOTER	MIX	Mix	SCOOTERMIX38853	2006-12-19	M	50994	2006-05-16	2006-08-23	.	1.15	1	1547
17641	STUART	COC	Cocker Spaniel	STUARTCOC38854	2006-10-02	M	19494	2006-05-17	2006-08-24	Small	2.17	1	1548
17641	ALLEGRA	COC	Cocker Spaniel	ALLEGRACOC38854	2006-10-02	F	19496	2006-05-17	2006-08-24	Small	0.66	1	1549
17641	GENIE	COC	Cocker Spaniel	GENIECOC38854	2006-10-02	F	19500	2006-05-17	2006-08-24	Small	2.17	1	1550
17641	CHER	COC	Cocker Spaniel	CHERCOC38854	2006-10-02	F	19505	2006-05-17	2006-08-24	Small	0.5	1	1551
17641	FITCH	COC	Cocker Spaniel	FITCHCOC38854	2006-10-02	M	19509	2006-05-17	2006-08-24	Small	0.17	0	1552
17011	PRINCE	SIB	Siberian Husky	PRINCESIB38854	2006-09-11	M	21489	2006-05-17	2006-08-08	Medium	1.99	1	1553
20425	SOLEIL	TPO	Toy Poodle	SOLEILTPO38854	2006-11-20	M	46062	2006-05-17	2006-08-14	Toy	4.14	1	1554
19621	SARAN	ECS	Cocker Spaniel	SARANECS38854	2006-11-03	F	49685	2006-05-17	2006-10-03	Small	4.14	1	1555
20445	AULI'L	MIN	Miniature Pinscher	AULI'LMIN38855	2006-11-17	F	18410	2006-05-18	2006-10-16	Toy	4.14	1	1556
9298	CHARLIE	LAB	Labrador Retriever	CHARLIELAB38855	2007-05-05	M	27756	2006-05-18	2007-03-27	Large	2.76	1	1557
4890	PETER PAN	CHI	Chihuahua	PETER PANCHI38855	2007-03-10	M	52665	2006-05-18	2006-10-23	Toy	0.66	1	1558
1285	TEQUILLA	CSH	Chihuahua	TEQUILLACSH38856	2007-01-20	F	22830	2006-05-19	2006-09-11	Toy	3.45	1	1559
20584	LILLI ROSE	YRK	Yorkshire Terrier	LILLI ROSEYRK38856	2006-11-24	F	23507	2006-05-19	2006-09-25	Toy	1.75	1	1560
17109	DRIFTER			DRIFTER38856	2006-09-21	M	38888	2006-05-19	2006-08-21	.	2.76	1	1561
16631	LUCY	DSC	Dachshund	LUCYDSC38857	2006-09-12	F	11948	2006-05-20	2006-08-15	Small	3.45	1	1562
10110	MAUKA	CSH	Chihuahua	MAUKACSH38857	2007-05-17	F	12282	2006-05-20	2006-09-01	Toy	1.51	1	1563
10110	MAKAI	CSH	Chihuahua	MAKAICSH38857	2007-05-17	F	12284	2006-05-20	2006-09-01	Toy	2.62	1	1564
7473	KANDY			KANDY38857	2007-04-15	F	22052	2006-05-20	2006-09-16	.	0.29	0	1565
18175	Ricky	DCL	Dachshund	RickyDCL38857	2006-10-10	M	50481	2006-05-20	2006-10-10	Small	0.02	0	1566
18289	JACKSON	BIC	Bichon Frise	JACKSONBIC38858	2006-10-09	M	11679	2006-05-21	2006-09-27	Small	3.45	1	1567
9837	DAISY	YRK	Yorkshire Terrier	DAISYYRK38858	2007-05-15	F	13585	2006-05-21	2007-01-15	Toy	3.45	1	1568
8029	COOKIE	BOX	Boxer	COOKIEBOX38858	2007-04-20	F	17264	2006-05-21	2007-02-08	Large	4.14	1	1569
1277	BANDIT	ACD	Australian Cattle Dog	BANDITACD38858	2007-01-17	M	19482	2006-05-21	2006-12-15	Medium	3.45	1	1570
21110	MONK	SHI	Shih-tzu	MONKSHI38858	2006-11-08	F	21354	2006-05-21	2006-10-27	Small	4.14	1	1571
5062	SOPHIA	SHI	Shih-tzu	SOPHIASHI38858	2007-03-14	F	22704	2006-05-21	2007-02-21	Small	3.45	1	1572
19614	JINBOY	JINDO	Jindo	JINBOYJINDO38858	2006-09-21	M	33370	2006-05-21	2006-08-21	Medium	0.87	1	1573
19614	DDOLJIN	JINDO	Jindo	DDOLJINJINDO38858	2006-09-21	M	33377	2006-05-21	2006-08-21	Medium	1.15	1	1574
16825	JORN	GER	German Shepard	JORNGER38858	2006-09-14	M	64064	2006-05-21	2006-08-22	Large	0.05	0	1575
5968	LANDER	PWD	Portugese Water Dog	LANDERPWD38859	2007-03-21	M	15513	2006-05-22	2006-09-18	Medium	0.5	1	1576
1564	BAM BAM	SAL	Saluki	BAM BAMSAL38859	2007-01-20	M	28637	2006-05-22	2006-08-29	Large	0.87	1	1577
18796	RUSTY	GLD	Golden Retriever	RUSTYGLD38859	2006-10-21	M	47681	2006-05-22	2006-09-21	Large	0.5	1	1578
17855	HOLLY	GLD	Golden Retriever	HOLLYGLD38860	2006-10-05	F	48334	2006-05-23	2006-09-05	Large	2.17	1	1579
20142	SAGE	SHI	Shih-tzu	SAGESHI38860	2006-11-14	F	49455	2006-05-23	2006-08-29	Small	0.29	0	1580
6643	KOBI	PUG	Pug	KOBIPUG38860	2007-04-03	M	64684	2006-05-23	2006-09-21	Small	4.14	1	1581
18437	MAPLE	MAL	Alaskan Malamute	MAPLEMAL38860	2006-10-13	F	66063	2006-05-23	2006-09-14	Large	1.38	1	1582
19036	ANGEL	POM	Pomeranian	ANGELPOM38861	2006-10-25	M	11597	2006-05-24	2006-09-16	Toy	1.38	1	1583
18449	ARIANNA	STO	Standard Poodle	ARIANNASTO38861	2006-10-10	F	49315	2006-05-24	2006-08-18	Large	3.45	1	1584
9400	ELLIE	DSM	Dachshund	ELLIEDSM38862	2007-05-05	F	21234	2006-05-25	2006-09-09	Small	2.76	1	1585
6920	BUTCH	SBT	Staffordshire Bull Terrier	BUTCHSBT38862	2007-04-07	M	22468	2006-05-25	2006-09-16	Medium	1.51	1	1586
381	KYLIE	CSH	Chihuahua	KYLIECSH38862	2007-01-05	F	26058	2006-05-25	2006-09-01	Toy	1.51	1	1587
18757	SHELBY	GLD	Golden Retriever	SHELBYGLD38862	2006-10-21	F	45825	2006-05-25	2006-09-15	Large	1.15	1	1588
3431	MURPHY	CSH	Chihuahua	MURPHYCSH38862	2007-02-16	M	64024	2006-05-25	2006-10-18	Toy	2.62	1	1589
17365	NO NAME PUP TO JAPAN			NO NAME PUP TO JAPAN38863	2006-09-27	F	15734	2006-05-26	2006-09-21	.	4.98	1	1590
8372	COCO	CSH	Chihuahua	COCOCSH38863	2007-04-26	F	21687	2006-05-26	2007-04-05	Toy	4.14	1	1591
19576	NIP NIP	PUG	Pug	NIP NIPPUG38863	2006-11-03	F	47636	2006-05-26	2006-09-29	Small	1.51	1	1592
3454	F42	PUG	Pug	F42PUG38863	2007-02-21	F	48735	2006-05-26	2007-02-04	Small	0.66	1	1593
5747	FRITZ	MIS	Miniature Schnauzer	FRITZMIS38864	2007-03-22	M	23604	2006-05-27	2006-07-15	Small	2.17	1	1594
16388	SHELLA	MIX	Mix	SHELLAMIX38864	2006-09-09	F	46672	2006-05-27	2006-08-21	.	4.98	1	1595
17638	ROCKY	YRK	Yorkshire Terrier	ROCKYYRK38864	2006-10-01	M	47805	2006-05-27	2006-09-01	Toy	1.15	1	1596
7473	LUCKY			LUCKY38865	2007-04-15	M	13253	2006-05-28	2006-09-16	.	1.15	1	1597
21306	EMMA			EMMA38866	2006-12-04	F	19606	2006-05-29	2006-09-25	.	4.14	1	1598
8443	PINKIE	SHI	Shih-tzu	PINKIESHI38866	2007-04-25	F	27745	2006-05-29	2007-04-03	Small	4.14	1	1599
17948	MIKEY	PUL	Puli	MIKEYPUL38866	2006-10-09	M	27959	2006-05-29	2006-09-08	Medium	4.98	1	1600
17948	AMELIA	PUL	Puli	AMELIAPUL38866	2006-10-09	F	28068	2006-05-29	2006-09-08	Medium	4.98	1	1601
20042	BUDDY	GLD	Golden Retriever	BUDDYGLD38866	2006-11-14	M	50700	2006-05-29	2006-09-20	Large	1.51	1	1602
20042	PAL	GLD	Golden Retriever	PALGLD38866	2006-11-14	M	51047	2006-05-29	2006-09-20	Large	0.87	1	1603
10947	HARPER	PUG	Pug	HARPERPUG38867	2007-05-29	M	43204	2006-05-30	2007-05-07	Small	3.45	1	1604
19856	BRUISER	CSH	Chihuahua	BRUISERCSH38868	2006-11-08	M	46832	2006-05-31	2006-10-02	Toy	4.14	1	1606
1114	KEIKA-ULA	SHI	Shih-tzu	KEIKA-ULASHI38868	2007-01-12	F	49960	2006-05-31	2007-01-06	Small	1.99	1	1607
6112	TEDDY			TEDDY38869	2007-03-24	M	1446	2006-06-01	2007-03-03	.	4.14	1	1608
9615	CHAMP	BOX	Boxer	CHAMPBOX38869	2007-05-14	M	17768	2006-06-01	2006-12-21	Large	1.51	1	1609
20445	PU ALI'	EBD	English Bulldog	PU ALI'EBD38869	2006-11-17	M	18552	2006-06-01	2006-10-16	Medium	4.14	1	1610
3210	OSCAR	STS	Standard Schnauzer	OSCARSTS38869	2007-02-16	M	18704	2006-06-01	2007-02-05	Medium	4.14	1	1611
2202	JACK	MIX	Mix	JACKMIX38869	2007-02-05	F	19043	2006-06-01	2007-01-08	.	4.14	1	1612
5084	RUSTY	MIX	Mix	RUSTYMIX38869	2007-03-15	M	19748	2006-06-01	2006-10-17	.	1.99	1	1613
7595	NALU	BOX	Boxer	NALUBOX38869	2007-04-17	F	40002	2006-06-01	2006-10-09	Large	3.45	1	1614
2212	ROCKY	SHI	Shih-tzu	ROCKYSHI38869	2007-02-01	M	43907	2006-06-01	2006-09-22	Small	0.87	1	1615
19268	LIZA	CCR	Chinese Crested	LIZACCR38869	2006-10-31	F	45191	2006-06-01	2006-09-21	Toy	3.45	1	1616
10381	BERKSHIRE	GLD	Golden Retriever	BERKSHIREGLD38869	2007-05-23	M	49128	2006-06-01	2006-09-27	Large	0.02	0	1617
3256	CHARLIE	BIC	Bichon Frise	CHARLIEBIC38869	2007-02-19	M	69011	2006-06-01	2006-08-19	Small	1.99	1	1618
834	MAUNSELL	ESS	Springer Spaniel	MAUNSELLESS38869	2006-12-24	M	69136	2006-06-01	2006-11-24	Medium	6.4	1	1619
18339	HAROLD	LAB	Labrador Retriever	HAROLDLAB38869	2006-10-13	M	77933	2006-06-01	2006-09-22	Large	2.17	1	1620
10412	PORSCHA	MIX	Mix	PORSCHAMIX38871	2007-05-18	F	15663	2006-06-03	2006-10-04	.	3.45	1	1621
9355	SALOME	DOB	Doberman Pinscher	SALOMEDOB38871	2007-05-08	F	67268	2006-06-03	2007-02-10	Large	0.87	1	1622
10820	BEBOS-MARVIN	PUG	Pug	BEBOS-MARVINPUG38872	2007-05-29	M	21387	2006-06-04	2006-09-14	Small	3.45	1	1623
6536	MILLIE	MIS	Miniature Schnauzer	MILLIEMIS38872	2007-04-02	F	49063	2006-06-04	2007-03-02	Small	3.45	1	1624
18355	PEANUT	DSM	Dachshund	PEANUTDSM38872	2006-10-06	F	77935	2006-06-04	2006-09-21	Small	2.17	1	1625
18704	ARBY	DSC	Dachshund	ARBYDSC38873	2006-10-20	F	31043	2006-06-05	2006-09-11	Small	2.17	1	1626
10991	PONO	GER	German Shepard	PONOGER38873	2007-06-01	M	51929	2006-06-05	2007-05-25	Large	3.45	1	1627
5727	COPY	CSH	Chihuahua	COPYCSH38873	2007-03-21	M	67275	2006-06-05	2007-02-17	Toy	2.17	1	1628
19113	ARIA	WEI	Weimaraner	ARIAWEI38873	2006-10-26	F	77703	2006-06-05	2006-09-26	Large	1.38	1	1629
4066	HIGHGROVE SEA STAR	PEM	Corgi	HIGHGROVE SEA STARPEM38874	2007-02-28	F	11978	2006-06-06	2007-01-10	Small	1.15	1	1630
19662	BRUNO	FBD	French Bulldog	BRUNOFBD38874	2006-11-07	M	26798	2006-06-06	2006-10-04	Small	2.62	1	1631
3086	JAMES	BOS	Boston Terrier	JAMESBOS38874	2007-02-13	M	37830	2006-06-06	2006-10-31	Small	3.45	1	1632
5403	LANI	GRT	Great Dane	LANIGRT38874	2007-03-08	F	43927	2006-06-06	2007-02-07	giant	2.76	1	1633
748	BENNIE	MIX	Mix	BENNIEMIX38874	2007-01-10	M	47509	2006-06-06	2006-12-04	.	6.01	1	1634
10930	CORKY	HAV	Havanese	CORKYHAV38874	2007-05-31	M	48144	2006-06-06	2007-05-15	Toy	3.45	1	1635
20972	CHARLIE BROWN	KCS	King Charles Spaniel	CHARLIE BROWNKCS38874	2006-11-28	M	48272	2006-06-06	2006-09-22	Toy	1.75	1	1636
18981	GIGI	HAV	Havanese	GIGIHAV38874	2006-10-25	F	49421	2006-06-06	2006-10-03	Toy	3.45	1	1637
3926	SOONER	MIX	Mix	SOONERMIX38875	2007-02-26	F	19860	2006-06-07	2007-02-02	.	4.14	1	1638
18869	SALSA			SALSA38875	2006-10-23	F	50026	2006-06-07	2006-09-28	.	2.76	1	1639
6487	KAMECO	YRK	Yorkshire Terrier	KAMECOYRK38876	2007-04-03	M	12344	2006-06-08	2006-11-28	Toy	4.14	1	1640
1118	ERNIE	MIX	Mix	ERNIEMIX38876	2007-01-16	M	13786	2006-06-08	2006-12-15	.	1.99	1	1641
21701	WIGGLES	DSC	Dachshund	WIGGLESDSC38876	2006-12-11	F	22086	2006-06-08	2006-09-29	Small	1.51	1	1642
17676	NEWBIE	DOB	Doberman Pinscher	NEWBIEDOB38876	2006-10-02	M	47262	2006-06-08	2006-09-01	Large	2.76	1	1643
1534	KOA	BEA	Beagle	KOABEA38877	2007-01-24	F	21852	2006-06-09	2006-09-27	Small	0.5	1	1644
19197	GUS	RAT	Rat Terrier	GUSRAT38877	2006-10-27	M	50150	2006-06-09	2006-09-21	Small	4.98	1	1645
10058	COO	COC	Cocker Spaniel	COOCOC38877	2007-05-18	M	50158	2006-06-09	2007-05-04	Small	2.76	1	1646
10872	LELA	MIX	Mix	LELAMIX38877	2007-05-31	F	56478	2006-06-09	2007-03-19	.	3.45	1	1647
20126	BLOSSOM	FBD	French Bulldog	BLOSSOMFBD38878	2006-11-15	F	13040	2006-06-10	2006-10-06	Small	2.62	1	1648
11910	TITO			TITO38878	2007-06-09	M	67297	2006-06-10	2007-04-17	.	1.75	1	1650
755	SPENCER	SBT	Staffordshire Bull Terrier	SPENCERSBT38878	2007-01-09	M	68968	2006-06-10	2006-09-10	Medium	1.99	1	1651
1377	ZION	SHI	Shih-tzu	ZIONSHI38879	2007-01-22	M	45359	2006-06-11	2006-12-22	Small	3.45	1	1652
6486	CANDY	MIX	Mix	CANDYMIX38880	2007-03-22	F	65808	2006-06-12	2006-11-07	.	0.5	1	1653
20250	MERIS	SFT	Fox Terrier	MERISSFT38881	2006-11-16	F	22431	2006-06-13	2006-10-13	Small	3.45	1	1654
20062	BLUE	ROT	Rottweiler	BLUEROT38881	2006-11-10	M	26549	2006-06-13	2006-09-16	giant	1.99	1	1655
7261	HANK	MIX	Mix	HANKMIX38881	2007-04-12	M	27461	2006-06-13	2007-04-05	.	4.14	1	1656
19701	SIKU	SIB	Siberian Husky	SIKUSIB38881	2006-11-07	M	50473	2006-06-13	2006-10-10	Medium	1.15	1	1657
8524	TOMMY	TIBETIAN TERRIER	Tibetan Terrier	TOMMYTIBETIAN TERRIER38881	2007-04-27	M	51816	2006-06-13	2007-03-05	Medium	2.17	1	1658
10290	MR FUZZ	MIX	Mix	MR FUZZMIX38882	2007-05-18	M	14860	2006-06-14	2007-01-05	.	1.75	1	1659
1014	NORKE	PUG	Pug	NORKEPUG38882	2007-01-12	F	28038	2006-06-14	2006-12-09	Small	1.15	1	1660
21444	HARRISON	OES	Old English Sheepdog	HARRISONOES38882	2006-11-30	M	43114	2006-06-14	2006-11-02	Large	1.15	1	1661
18885	HARLEY	ECS	Cocker Spaniel	HARLEYECS38882	2006-10-23	F	69339	2006-06-14	2006-09-22	Small	3.45	1	1662
2620	HARRY	LAB	Labrador Retriever	HARRYLAB38883	2007-02-10	M	26824	2006-06-15	2006-10-19	Large	1.51	1	1663
7842	MILLI	ESS	Springer Spaniel	MILLIESS38883	2007-04-19	F	43240	2006-06-15	2006-09-22	Medium	1.15	1	1664
11918	CYRUS	ASI	Australian Shepard	CYRUSASI38883	2007-06-08	M	46390	2006-06-15	2007-04-21	Medium	1.75	1	1665
19960	EDDIE	GLD	Golden Retriever	EDDIEGLD38883	2006-11-10	M	49201	2006-06-15	2006-10-13	Large	1.15	1	1666
19303	FINN	MIX	Mix	FINNMIX38883	2006-10-27	M	50117	2006-06-15	2006-10-09	.	3.45	1	1667
19757	BEAU			BEAU38883	2006-11-07	F	51033	2006-06-15	2006-10-03	.	4.98	1	1668
19757	BUCK			BUCK38883	2006-11-07	M	51050	2006-06-15	2006-10-03	.	4.98	1	1669
5392	TINKERBELL	MIX	Mix	TINKERBELLMIX38883	2007-03-13	F	64049	2006-06-15	2006-10-24	.	2.76	1	1670
19358	MOSSIE	BOR	Border Collie	MOSSIEBOR38883	2006-11-01	M	64619	2006-06-15	2006-09-22	Medium	2.62	1	1671
2063	TOOTS	YRK	Yorkshire Terrier	TOOTSYRK38884	2007-02-01	F	13628	2006-06-16	2007-01-20	Toy	2.17	1	1672
21498	JERSEY	MIX	Mix	JERSEYMIX38884	2006-12-06	F	15118	2006-06-16	2006-06-30	.	3.45	1	1673
9587	SUKI	GER	German Shepard	SUKIGER38884	2007-05-09	F	28520	2006-06-16	2007-04-11	Large	4.98	1	1674
20684	CABOT	SHI	Shih-tzu	CABOTSHI38884	2006-11-27	M	51674	2006-06-16	2006-10-24	Small	4.98	1	1675
19682	ONA	SPI	Shar-pei	ONASPI38884	2006-11-06	F	79397	2006-06-16	2006-10-03	Medium	0.1	0	1676
1609	HERMOSA	WEI	Weimaraner	HERMOSAWEI38885	2007-01-26	F	13061	2006-06-17	2006-09-12	Large	2.76	1	1677
3115	HANNAH	SPO	Standard Poodle	HANNAHSPO38885	2007-02-15	F	13572	2006-06-17	2007-01-15	Large	3.45	1	1678
3179	HANA	MIX	Mix	HANAMIX38885	2007-02-15	F	17772	2006-06-17	2006-09-15	.	4.14	1	1679
20848	TITO	RHD	Rhodesian Ridgeback	TITORHD38886	2006-11-27	M	48452	2006-06-18	2006-10-24	Large	4.14	1	1680
1919	CARLOS	PUG	Pug	CARLOSPUG38886	2007-01-25	M	49237	2006-06-18	2006-12-21	Small	2.17	1	1681
3957	MARLEY	LAB	Labrador Retriever	MARLEYLAB38886	2007-02-27	F	50873	2006-06-18	2007-02-22	Large	4.14	1	1682
20084	BASHA			BASHA38887	2006-11-13	F	49617	2006-06-19	2006-10-23	.	4.14	1	1683
4173	MARGARET	MIX	Mix	MARGARETMIX38888	2007-02-28	F	49263	2006-06-20	2007-01-22	.	2.17	1	1684
249	PENNY	IRISH WOLFHOUND	Irish Wolf Hound	PENNYIRISH WOLFHOUND38888	2007-01-02	F	51321	2006-06-20	2006-10-18	giant	0.38	0	1685
6162	MOON	LAB	Labrador Retriever	MOONLAB38888	2007-03-29	M	54461	2006-06-20	2007-03-27	Large	0.04	0	1686
4475	POKI	MLT	Maltese	POKIMLT38888	2007-03-02	M	69317	2006-06-20	2007-02-06	Toy	2.76	1	1687
7268	TIM	SPO	Standard Poodle	TIMSPO38889	2007-04-13	M	15271	2006-06-21	2006-10-04	Large	4.14	1	1688
1095	LEWIS	MAL	Alaskan Malamute	LEWISMAL38889	2007-01-17	M	48495	2006-06-21	2006-10-14	Large	1.99	1	1689
20990	MOLLY	PUG	Pug	MOLLYPUG38889	2006-11-30	F	49212	2006-06-21	2006-10-11	Small	0.5	1	1690
20091	SAFI	ROD	Rhodesian Ridgeback	SAFIROD38889	2006-11-13	M	49872	2006-06-21	2006-10-10	Large	4.14	1	1691
21601	GEISHA			GEISHA38889	2006-12-06	F	51498	2006-06-21	2006-10-11	.	4.14	1	1692
456	ROXIE	SHC	Shetland Sheepdog	ROXIESHC38890	2007-01-08	F	11233	2006-06-22	2006-10-05	.	0.38	0	1693
3561	TAKETAH	BOS	Boston Terrier	TAKETAHBOS38890	2007-02-19	F	46426	2006-06-22	2007-01-22	Small	3.45	1	1694
21057	FREDDIE	BEA	Beagle	FREDDIEBEA38890	2006-11-28	M	48593	2006-06-22	2006-10-12	Small	1.99	1	1695
1457	ZOE	BRT	Brittany Spaniel	ZOEBRT38890	2007-01-23	F	51070	2006-06-22	2006-10-25	Medium	4.14	1	1696
135	BOBBY			BOBBY38890	2006-12-22	M	77970	2006-06-22	2006-11-06	.	4.56	1	1697
20633	MALCOLM	GRT	Great Dane	MALCOLMGRT38891	2006-11-17	M	27452	2006-06-23	2006-10-24	giant	1.75	1	1698
21578	SUMMER	MLT	Maltese	SUMMERMLT38891	2006-12-07	F	48393	2006-06-23	2006-11-09	Toy	3.45	1	1699
335	GRACE	CHN	Japanese Chin	GRACECHN38891	2007-01-04	F	49882	2006-06-23	2006-12-04	Toy	4.14	1	1700
9255	SPRITE	ACD	Australian Cattle Dog	SPRITEACD38891	2007-05-09	F	50940	2006-06-23	2007-04-25	Medium	2.76	1	1701
9401	MOCHA	ITI	Italian Grey Hound	MOCHAITI38891	2007-05-09	F	53454	2006-06-23	2007-04-21	Toy	2.76	1	1702
9845	MONK	PEK	Pekingese	MONKPEK38892	2007-05-15	M	18608	2006-06-24	2006-12-16	Toy	3.45	1	1703
20715	TIBOR	GER	German Shepard	TIBORGER38892	2006-11-21	M	50689	2006-06-24	2006-11-02	Large	2.62	1	1704
19441	HANK	ESS	Springer Spaniel	HANKESS38892	2006-11-02	M	50969	2006-06-24	2006-10-02	Medium	4.98	1	1705
9693	TRIXIE	PNT	Pointer	TRIXIEPNT38893	2007-05-14	F	13453	2006-06-25	2007-03-20	Large	3.45	1	1706
9376	MUGGS	PUG	Pug	MUGGSPUG38893	2007-05-09	M	15107	2006-06-25	2007-04-17	Small	2.76	1	1707
21298	MARIGOLD	GLD	Golden Retriever	MARIGOLDGLD38893	2006-12-05	F	15861	2006-06-25	2006-10-25	Large	4.14	1	1708
6803	GEY	CSH	Chihuahua	GEYCSH38893	2007-04-06	F	50036	2006-06-25	2006-11-22	Toy	3.45	1	1709
12248	MISTER	CCR	Chinese Crested	MISTERCCR38894	2007-06-19	M	11575	2006-06-26	2007-02-12	Toy	0.66	1	1710
5518	KAJSA	COCAPOO	Cocker Spaniel	KAJSACOCAPOO38894	2007-03-20	F	11994	2006-06-26	2006-11-03	Small	0.17	0	1711
9310	BAILY	PUG	Pug	BAILYPUG38894	2007-05-08	F	17283	2006-06-26	2006-10-30	Small	0.5	1	1712
5186	NISHA	MIX	Mix	NISHAMIX38894	2007-03-09	F	51605	2006-06-26	2007-02-09	.	2.17	1	1713
10540	TACO	MIX	Mix	TACOMIX38895	2007-05-24	M	12425	2006-06-27	2007-01-22	.	2.17	1	1714
4503	REDSKY'S APACHE SONG	MIN	Miniature Pinscher	REDSKY'S APACHE SONGMIN38895	2007-03-05	F	15039	2006-06-27	2006-11-03	Toy	2.76	1	1715
20164	DINO	YRK	Yorkshire Terrier	DINOYRK38895	2006-11-08	M	67755	2006-06-27	2006-10-02	Toy	1.99	1	1716
637	BLUE BERRY	CLH	Chihuahua	BLUE BERRYCLH38896	2007-01-06	M	27014	2006-06-28	2006-11-09	Toy	2.62	1	1717
637	LA PERLA	CLH	Chihuahua	LA PERLACLH38896	2007-01-06	F	27195	2006-06-28	2006-11-09	Toy	1.99	1	1718
637	TIJUANA	CLH	Chihuahua	TIJUANACLH38896	2007-01-06	F	27301	2006-06-28	2006-11-09	Toy	6.4	1	1719
637	ACORNS AZOLITA	CLH	Chihuahua	ACORNS AZOLITACLH38896	2007-01-06	F	28427	2006-06-28	2006-11-09	Toy	1.99	1	1720
11775	TOBY	BOX	Boxer	TOBYBOX38896	2007-06-04	M	41837	2006-06-28	2007-05-21	Large	2.76	1	1721
579	MAGGIE	GLD	Golden Retriever	MAGGIEGLD38896	2007-01-09	F	50788	2006-06-28	2006-10-18	Large	0.22	0	1722
579	MAX	GLD	Golden Retriever	MAXGLD38896	2007-01-09	M	52050	2006-06-28	2006-10-18	Large	2.62	1	1723
12771	SAMMY	BIC	Bichon Frise	SAMMYBIC38896	2007-06-25	M	54540	2006-06-28	2007-05-21	Small	3.46	1	1724
20554	BASEL	RAT	Rat Terrier	BASELRAT38897	2006-11-21	M	19385	2006-06-29	2006-10-19	Small	2.76	1	1725
19975	ALLIE	SHI	Shih-tzu	ALLIESHI38897	2006-11-10	F	19469	2006-06-29	2006-10-02	Small	2.17	1	1726
637	CHOC. CHUNK COOKIE	CLH	Chihuahua	CHOC. CHUNK COOKIECLH38897	2007-01-06	F	27030	2006-06-29	2006-11-09	Toy	1.99	1	1727
637	FUDGE CREAM BROWNIE	CLH	Chihuahua	FUDGE CREAM BROWNIECLH38897	2007-01-06	F	27325	2006-06-29	2006-11-09	Toy	1.99	1	1728
637	ACORNS COCO II	CLH	Chihuahua	ACORNS COCO IICLH38897	2007-01-06	M	27742	2006-06-29	2006-11-09	Toy	0.87	1	1729
637	CHOC. CHIPPIE JR.	CLH	Chihuahua	CHOC. CHIPPIE JR.CLH38897	2007-01-06	M	27789	2006-06-29	2006-11-09	Toy	3.46	1	1730
21243	SCOOBY			SCOOBY38897	2006-12-05	M	45754	2006-06-29	2006-10-30	.	2.62	1	1731
19580	OLIVIA	GLD	Golden Retriever	OLIVIAGLD38897	2006-11-04	F	49547	2006-06-29	2006-10-18	Large	4.14	1	1732
21836	POBBLES			POBBLES38897	2006-11-26	F	49943	2006-06-29	2006-10-09	.	3.45	1	1733
6105	MADDIE	DSC	Dachshund	MADDIEDSC38898	2007-03-27	F	15305	2006-06-30	2006-11-28	Small	0.5	1	1734
8374	SUGAR	BOX	Boxer	SUGARBOX38898	2007-04-26	F	34324	2006-06-30	2006-09-30	Large	4.14	1	1735
10597	FOXY	PAP	Papillion	FOXYPAP38898	2007-05-25	F	49324	2006-06-30	2006-09-30	Toy	2.17	1	1736
21652	MILLY	DSM	Dachshund	MILLYDSM38898	2006-12-08	F	50739	2006-06-30	2006-11-10	Small	4.14	1	1737
10664	MOLLY	BEA	Beagle	MOLLYBEA38898	2007-05-29	F	64027	2006-06-30	2006-10-24	Small	3.45	1	1738
10931	SPICEY	ABD	Bulldog	SPICEYABD38899	2007-05-30	F	12216	2006-07-01	2007-03-01	Large	3.45	1	1739
22385	ABBY	MIX	Mix	ABBYMIX38899	2006-12-21	F	14866	2006-07-01	2006-11-18	.	2.76	1	1740
20676	CHAMP	CSH	Chihuahua	CHAMPCSH38899	2006-11-21	M	18795	2006-07-01	2006-10-13	Toy	4.98	1	1741
637	LEOPOLD	CLH	Chihuahua	LEOPOLDCLH38899	2007-01-06	M	27204	2006-07-01	2006-11-09	Toy	1.99	1	1742
20243	RANGER	LAB	Labrador Retriever	RANGERLAB38899	2006-11-16	M	37599	2006-07-01	2006-10-25	Large	3.45	1	1743
21681	POPPY	LAB	Labrador Retriever	POPPYLAB38899	2006-12-11	F	49177	2006-07-01	2006-11-27	Large	4.14	1	1744
1024	TURBO	MIN	Miniature Pinscher	TURBOMIN38899	2007-01-05	F	49430	2006-07-01	2006-10-16	Toy	3.45	1	1745
4526	RUI	POODLE	Poodle	RUIPOODLE38899	2007-03-07	M	67290	2006-07-01	2006-10-26	.	2.76	1	1746
22177	TIMARU	SAL	Saluki	TIMARUSAL38900	2006-12-19	F	71534	2006-07-02	2006-11-16	Large	3.45	1	1747
4618	BALTO	BER	Bernese Mountain Dog	BALTOBER38900	2007-03-07	M	77741	2006-07-02	2007-02-01	Large	0.66	1	1748
12681	MIA	SIB	Siberian Husky	MIASIB38901	2007-06-22	F	27498	2006-07-03	2007-06-12	Medium	3.45	1	1749
19456	MIDNIGHT DANCER	CSH	Chihuahua	MIDNIGHT DANCERCSH38901	2006-10-30	F	27620	2006-07-03	2006-10-06	Toy	3.45	1	1750
3258	BALL	SHI	Shih-tzu	BALLSHI38901	2007-02-13	M	28041	2006-07-03	2007-01-23	Small	4.14	1	1751
19833	TIGER	YRK	Yorkshire Terrier	TIGERYRK38901	2006-11-08	M	31611	2006-07-03	2006-10-21	Toy	4.14	1	1752
19143	PIXIE	PAP	Papillion	PIXIEPAP38901	2006-10-24	F	37971	2006-07-03	2006-10-03	Toy	2.17	1	1753
6126	CHARLIE	JRT	Jack Russell Terrier	CHARLIEJRT38901	2007-03-23	M	48666	2006-07-03	2006-08-26	Small	4.14	1	1754
17483	FLEUR	ROD	Rhodesian Ridgeback	FLEURROD38902	2006-09-29	F	21835	2006-07-04	2006-09-07	Large	2.17	1	1755
562	PATCH	SHI	Shih-tzu	PATCHSHI38902	2007-01-05	F	41660	2006-07-04	2006-11-29	Small	4.98	1	1756
6841	KONA	MIX	Mix	KONAMIX38902	2007-04-06	M	47272	2006-07-04	2006-11-08	.	0.38	0	1757
21919	JACK	SPI	Shar-pei	JACKSPI38902	2006-12-16	M	50444	2006-07-04	2006-11-25	Medium	1.99	1	1758
2426	MAX	DOB	Doberman Pinscher	MAXDOB38902	2007-02-08	M	51135	2006-07-04	2006-11-15	Large	4.14	1	1759
8373	KOOTER	SHI	Shih-tzu	KOOTERSHI38902	2007-04-26	M	52844	2006-07-04	2006-11-06	Small	4.14	1	1760
2451	LADY	MIN	Miniature Pinscher	LADYMIN38903	2007-02-08	F	26677	2006-07-05	2007-01-08	Toy	4.14	1	1761
19458	PATRIOT	WOF	Irish Wolf Hound	PATRIOTWOF38903	2006-11-02	M	48416	2006-07-05	2006-09-29	giant	3.45	1	1762
18157	KU	PIT	Pitbull Terrier	KUPIT38903	2006-10-09	M	48627	2006-07-05	2006-10-09	Medium	0.05	0	1763
21457	COMEDY CENTRAL	NEW	Newfoundland	COMEDY CENTRALNEW38903	2006-12-06	F	49210	2006-07-05	2006-10-28	giant	2.17	1	1764
12627	BREE	STP	Standard Poodle	BREESTP38903	2007-06-25	F	53766	2006-07-05	2006-12-04	Large	0.02	0	1765
2784	LILLY	POM	Pomeranian	LILLYPOM38904	2007-02-12	F	22535	2006-07-06	2006-10-19	Toy	1.99	1	1766
3630	MAXIMILIAN	YRK	Yorkshire Terrier	MAXIMILIANYRK38904	2007-02-22	M	33880	2006-07-06	2006-11-15	Toy	2.62	1	1767
21001	MARIA BONITA DE LAS COLINAS	CSH	Chihuahua	MARIA BONITA DE LAS COLINASCSH38905	2006-11-22	F	14835	2006-07-07	2006-10-12	Toy	1.75	1	1768
21136	CAMI	POM	Pomeranian	CAMIPOM38905	2006-11-23	M	33379	2006-07-07	2006-10-20	Toy	4.14	1	1769
22052	JET	SIB	Siberian Husky	JETSIB38905	2006-12-16	M	51253	2006-07-07	2006-11-10	Medium	3.45	1	1770
6169	DAISY	BIC	Bichon Frise	DAISYBIC38905	2007-03-28	F	52009	2006-07-07	2006-10-10	Small	1.99	1	1771
1527	GAYLEE	DOB	Doberman Pinscher	GAYLEEDOB38906	2007-01-22	F	19710	2006-07-08	2006-12-26	Large	2.76	1	1772
2482	FELIX	SPO	Standard Poodle	FELIXSPO38907	2007-02-07	M	12918	2006-07-09	2006-12-06	Large	1.15	1	1773
433	COOKIE	POM	Pomeranian	COOKIEPOM38907	2007-01-06	M	18578	2006-07-09	2006-12-17	Toy	3.45	1	1774
144	CRICKET			CRICKET38907	2007-01-03	F	50372	2006-07-09	2006-12-05	.	6.4	1	1775
1427	CHARLIE	DSC	Dachshund	CHARLIEDSC38907	2007-01-24	M	50629	2006-07-09	2006-11-28	Small	4.14	1	1776
219	DIXIE	MIN	Miniature Pinscher	DIXIEMIN38907	2007-01-02	F	51697	2006-07-09	2006-11-06	Toy	4.14	1	1777
6531	DELILA	POM	Pomeranian	DELILAPOM38907	2007-04-03	F	52156	2006-07-09	2007-03-13	Toy	3.45	1	1778
4100	TILLY	SHI	Shih-tzu	TILLYSHI38908	2007-03-01	F	19750	2006-07-10	2007-02-09	Small	4.98	1	1779
20275	MILO	MLT	Maltese	MILOMLT38908	2006-11-15	M	22863	2006-07-10	2006-10-16	Toy	2.76	1	1780
19456	TWO-TONE DELIGHT	CSH	Chihuahua	TWO-TONE DELIGHTCSH38908	2006-10-30	F	27148	2006-07-10	2006-10-06	Toy	3.45	1	1781
19456	SUZZIE'S MALE	CSH	Chihuahua	SUZZIE'S MALECSH38908	2006-10-30	M	27319	2006-07-10	2006-10-06	Toy	3.45	1	1782
4667	LOUISIANNA	JRT	Jack Russell Terrier	LOUISIANNAJRT38908	2007-03-08	F	47130	2006-07-10	2007-01-25	Small	4.14	1	1783
479	TAYLOR	POM	Pomeranian	TAYLORPOM38908	2007-01-08	F	48974	2006-07-10	2006-11-14	Toy	1.99	1	1784
9449	YUMA	YRK	Yorkshire Terrier	YUMAYRK38908	2007-05-11	M	49667	2006-07-10	2007-04-06	Toy	2.76	1	1785
1297	CC	MAL	Alaskan Malamute	CCMAL38908	2007-01-20	F	50412	2006-07-10	2006-11-22	Large	3.45	1	1786
1297	PATIENCE	MAL	Alaskan Malamute	PATIENCEMAL38908	2007-01-20	F	50652	2006-07-10	2006-11-22	Large	1.51	1	1787
7976	ROCKY	BOX	Boxer	ROCKYBOX38908	2007-04-18	M	66909	2006-07-10	2007-03-28	Large	3.45	1	1788
4642	HALLIE	LAB	Labrador Retriever	HALLIELAB38909	2007-03-06	F	51897	2006-07-11	2006-11-07	Large	0.5	1	1789
10241	LINDA	BEA	Beagle	LINDABEA38909	2007-05-18	M	67262	2006-07-11	2007-01-05	Small	0.38	0	1790
12660	CHANCE	BEA	Beagle	CHANCEBEA38909	2007-06-22	M	69993	2006-07-11	2007-01-15	Small	0.87	1	1791
11337	PRINCESS	CDT	Coton de Tuleire	PRINCESSCDT38910	2007-06-05	F	21943	2006-07-12	2006-12-04	Small	2.17	1	1792
11409	ALEXA	YRK	Yorkshire Terrier	ALEXAYRK38911	2007-06-05	F	45765	2006-07-13	2007-01-11	Toy	4.98	1	1793
21725	COOPER	LAB	Labrador Retriever	COOPERLAB38911	2006-12-13	M	49548	2006-07-13	2006-10-11	Large	2.76	1	1794
10093	NALU	MIX	Mix	NALUMIX38911	2007-05-16	M	51237	2006-07-13	2007-05-04	.	2.62	1	1795
10119	TOP ALL GEORGE	SPO	Standard Poodle	TOP ALL GEORGESPO38912	2007-05-21	M	37854	2006-07-14	2007-04-21	Large	4.14	1	1796
4992	PACHO	SHI	Shih-tzu	PACHOSHI38912	2007-02-09	M	79417	2006-07-14	2007-01-09	Small	3.45	1	1797
21282	RUDY OF GRADON	FBD	French Bulldog	RUDY OF GRADONFBD38913	2006-12-05	M	11992	2006-07-15	2006-11-09	Small	4.14	1	1798
11385	RILEY	LAB	Labrador Retriever	RILEYLAB38913	2007-06-06	F	15790	2006-07-15	2007-05-17	Large	2.17	1	1799
7706	BELLA	MAL	Alaskan Malamute	BELLAMAL38913	2007-04-19	F	15885	2006-07-15	2007-04-19	Large	0.03	0	1801
20375	MOCA	TPO	Toy Poodle	MOCATPO38913	2006-11-14	M	17949	2006-07-15	2006-10-17	Toy	4.14	1	1802
10111	CASH	GRT	Great Dane	CASHGRT38913	2007-05-21	M	50178	2006-07-15	2007-05-14	giant	4.14	1	1804
6692	SEBASTIAN			SEBASTIAN38913	2007-04-03	M	50789	2006-07-15	2007-01-29	.	0.87	1	1805
2117	LILI	LAB	Labrador Retriever	LILILAB38913	2007-02-02	F	69006	2006-07-15	2006-12-27	Large	2.17	1	1806
11841	KOA	ACD	Australian Cattle Dog	KOAACD38913	2007-06-05	F	71497	2006-07-15	2006-11-06	Medium	2.76	1	1807
2099	KRAKA	DSM	Dachshund	KRAKADSM38914	2007-01-29	M	13302	2006-07-16	2006-11-02	Small	2.17	1	1808
20894	SINTRA	MIX	Mix	SINTRAMIX38914	2006-11-27	M	18590	2006-07-16	2006-11-01	.	2.62	1	1809
4414	PRINCESS	CSH	Chihuahua	PRINCESSCSH38914	2007-02-28	F	44983	2006-07-16	2006-10-18	Toy	3.45	1	1810
13147	JEAN CLAUDE	CSH	Chihuahua	JEAN CLAUDECSH38914	2007-06-29	M	52706	2006-07-16	2007-05-21	Toy	2.17	1	1811
13292	ROXIE	GLD	Golden Retriever	ROXIEGLD38915	2007-07-02	F	45781	2006-07-17	2007-06-01	Large	4.14	1	1812
20393	CALLANDRA			CALLANDRA38916	2006-11-16	F	48530	2006-07-18	2006-10-24	.	4.14	1	1813
9427	SOPHIE	POM	Pomeranian	SOPHIEPOM38916	2007-05-09	F	50883	2006-07-18	2007-03-08	Toy	2.76	1	1814
267	ELIZA	TPO	Toy Poodle	ELIZATPO38917	2007-01-03	F	13509	2006-07-19	2006-11-14	Toy	1.51	1	1815
681	BOSWELL	MIX	Mix	BOSWELLMIX38917	2007-01-10	M	13686	2006-07-19	2006-11-08	.	1.15	1	1816
6838	MAX	GRT	Great Dane	MAXGRT38917	2007-04-09	M	50509	2006-07-19	2006-10-24	giant	1.99	1	1817
20103	HONIDGE ILLUSION	BLD	Blood Hound	HONIDGE ILLUSIONBLD38918	2006-11-09	F	28582	2006-07-20	2006-10-17	giant	4.14	1	1818
21080	BUDDY	MIX	Mix	BUDDYMIX38918	2006-11-30	M	50738	2006-07-20	2006-11-09	.	4.14	1	1819
1159	LOLA	SHI	Shih-tzu	LOLASHI38918	2007-01-17	F	67218	2006-07-20	2006-12-14	Small	4.14	1	1820
1493	WOLFANG	MIS	Miniature Schnauzer	WOLFANGMIS38918	2007-01-23	M	79365	2006-07-20	2006-10-11	Small	1.15	1	1821
20975	FREDDIE	TIB	Tibetan Terrier	FREDDIETIB38919	2006-11-29	M	47036	2006-07-21	2006-10-27	Medium	1.75	1	1822
6155	FREDDY	TIB	Tibetan Terrier	FREDDYTIB38919	2007-03-28	M	51169	2006-07-21	2007-03-28	Medium	0.17	0	1823
1397	LILY	BEA	Beagle	LILYBEA38919	2007-01-22	F	51956	2006-07-21	2006-10-16	Small	0.29	0	1824
21243	SHAGGY	WES	West Highland Terrier	SHAGGYWES38920	2006-12-05	F	12179	2006-07-22	2006-11-15	Small	1.51	1	1825
21029	WILLIAM	MIX	Mix	WILLIAMMIX38920	2006-11-27	M	46308	2006-07-22	2006-10-24	.	4.14	1	1826
4485	JUAN	SHT	Shetland Sheepdog	JUANSHT38921	2007-03-01	M	64683	2006-07-23	2007-02-01	Small	2.76	1	1827
9061	JIJI	SCH	Schnauzer	JIJISCH38922	2007-05-04	M	51743	2006-07-24	2007-03-13	Medium	2.76	1	1828
13733	GORDON	LEO	Leonberger	GORDONLEO38922	2007-07-09	M	54529	2006-07-24	2006-11-17	giant	2.17	1	1829
3843	ZEUS	GLD	Golden Retriever	ZEUSGLD38922	2007-02-21	M	67760	2006-07-24	2006-10-25	Large	0.38	0	1830
217	BOO			BOO38923	2007-01-04	M	12832	2006-07-25	2006-11-27	.	4.14	1	1831
22470	AMELIA	BOX	Boxer	AMELIABOX38923	2006-12-23	F	27841	2006-07-25	2006-12-01	Large	4.14	1	1833
22470	MARLEY	BOX	Boxer	MARLEYBOX38923	2006-12-23	F	28089	2006-07-25	2006-12-01	Large	4.14	1	1834
21134	YANIK	STO	Standard Poodle	YANIKSTO38923	2006-12-02	M	48243	2006-07-25	2006-11-04	Large	4.14	1	1835
1042	PIPA	BEA	Beagle	PIPABEA38923	2007-01-17	F	51699	2006-07-25	2007-01-03	Small	3.45	1	1836
439	CASPER	TPO	Toy Poodle	CASPERTPO38923	2007-01-05	M	69248	2006-07-25	2006-11-28	Toy	1.51	1	1837
862	BASHA	YRK	Yorkshire Terrier	BASHAYRK38924	2007-01-11	F	12383	2006-07-26	2006-10-25	Toy	1.99	1	1838
9491	ISABEL	CSH	Chihuahua	ISABELCSH38924	2007-05-10	F	16321	2006-07-26	2007-04-17	Toy	3.45	1	1839
11696	TOMMY	CCR	Chinese Crested	TOMMYCCR38924	2007-06-11	M	52922	2006-07-26	2007-02-07	Toy	1.38	1	1840
770	LOLO			LOLO38925	2007-01-11	M	13296	2006-07-27	2006-12-27	.	6.4	1	1841
21120	LEO			LEO38925	2006-11-30	M	49672	2006-07-27	2006-10-30	.	4.14	1	1842
8816	4D7B	FBD	French Bulldog	4D7BFBD38927	2007-05-02	M	48559	2006-07-29	2007-04-17	Small	1.75	1	1843
10992	CHLOE	MIX	Mix	CHLOEMIX38927	2007-05-31	F	51507	2006-07-29	2007-05-24	.	3.45	1	1844
3717	MAX	LAB	Labrador Retriever	MAXLAB38928	2007-02-15	M	48284	2006-07-30	2006-11-29	Large	0.38	0	1846
2490	OSCAR	SHI	Shih-tzu	OSCARSHI38928	2007-02-06	M	49081	2006-07-30	2006-12-19	Small	3.45	1	1847
4260	APHRA	SIB	Siberian Husky	APHRASIB38929	2007-02-28	F	38506	2006-07-31	2006-12-20	Medium	1.99	1	1848
7474	BIRGITTA	DAL	Dalmatian	BIRGITTADAL38929	2007-04-17	F	50446	2006-07-31	2006-11-16	Medium	0.17	0	1849
10121	LANI	GLD	Golden Retriever	LANIGLD38929	2007-05-21	F	52679	2006-07-31	2007-04-30	Large	4.14	1	1850
10931	RIOT	ABD	Bulldog	RIOTABD38930	2007-05-30	M	12238	2006-08-01	2007-03-01	Large	0.66	1	1851
12738	PANDA	TFT	Toy Fox Terrier	PANDATFT38930	2007-06-21	F	15363	2006-08-01	2007-06-21	Toy	0.38	0	1852
13626	KOBY	MIX	Mix	KOBYMIX38930	2007-07-06	M	16087	2006-08-01	2007-06-25	.	3.45	1	1854
13636	KONA	BEA	Beagle	KONABEA38930	2007-07-06	M	17382	2006-08-01	2007-03-01	Small	3.45	1	1855
21050	SKEETER	MIX	Mix	SKEETERMIX38930	2006-11-27	M	19132	2006-08-01	2006-11-13	.	2.62	1	1856
22494	HEIDI	STS	Standard Schnauzer	HEIDISTS38930	2006-12-26	F	22858	2006-08-01	2006-12-04	Medium	4.14	1	1857
18884	SAKURA	MIX	Mix	SAKURAMIX38930	2006-10-21	F	26268	2006-08-01	2006-09-16	.	3.45	1	1858
6813	SHADOW	MIX	Mix	SHADOWMIX38930	2007-04-04	F	49028	2006-08-01	2007-02-07	.	3.45	1	1859
14643	BLIZZARD	GLD	Golden Retriever	BLIZZARDGLD38930	2007-07-23	M	51064	2006-08-01	2007-07-10	Large	3.45	1	1860
9593	IZZY	WES	West Highland Terrier	IZZYWES38930	2007-05-08	F	64130	2006-08-01	2006-12-20	Small	3.46	1	1861
4692	JACK	FBD	French Bulldog	JACKFBD38930	2007-03-06	M	67559	2006-08-01	2006-11-10	Small	0.29	0	1863
4253	MARCO	IRS	Irish Terrier	MARCOIRS38931	2007-03-02	M	13586	2006-08-02	2007-01-31	Small	0.5	1	1864
12684	KAYLI	BOX	Boxer	KAYLIBOX38931	2007-06-22	F	53227	2006-08-02	2007-06-11	Large	3.45	1	1865
11069	BINX	MIX	Mix	BINXMIX38931	2007-05-31	M	64128	2006-08-02	2006-12-13	.	0.87	1	1866
1758	SARA	SCS	Cocker Spaniel	SARASCS38932	2007-01-26	F	22305	2006-08-03	2006-11-13	Small	1.75	1	1867
19889	LUCY	YRK	Yorkshire Terrier	LUCYYRK38932	2006-11-09	F	47831	2006-08-03	2006-10-25	Toy	4.14	1	1868
21053	SHEENA	WOF	Irish Wolf Hound	SHEENAWOF38933	2006-11-30	F	12985	2006-08-04	2006-11-02	giant	1.51	1	1870
9534	SHEENA			SHEENA38933	2007-05-14	F	22080	2006-08-04	2006-11-02	.	0.5	1	1871
20670	PUPPY	BOR	Border Collie	PUPPYBOR38933	2006-11-24	M	49982	2006-08-04	2006-10-27	Medium	0.66	1	1872
15026	DAFINA	RHO	Rhodesian Ridgeback	DAFINARHO38933	2007-07-27	F	64781	2006-08-04	2007-07-06	Large	3.45	1	1873
21609	CEDRIC	CCR	Chinese Crested	CEDRICCCR38934	2006-12-07	M	50560	2006-08-05	2006-11-07	Toy	2.62	1	1874
13097	GUCCI	PAP	Papillion	GUCCIPAP38935	2007-06-28	F	13284	2006-08-06	2007-02-05	Toy	2.17	1	1875
11478	TAJI	POM	Pomeranian	TAJIPOM38935	2007-06-07	F	14136	2006-08-06	2007-02-14	Toy	4.98	1	1876
664	FLETCH	BOR	Border Collie	FLETCHBOR38935	2007-01-10	M	48163	2006-08-06	2006-12-20	Medium	6.4	1	1877
9852	FRANKIE G	MIX	Mix	FRANKIE GMIX38935	2007-05-14	F	50225	2006-08-06	2006-12-16	.	0.22	0	1878
3950	BLACKY	YRK	Yorkshire Terrier	BLACKYYRK38935	2007-02-26	M	78855	2006-08-06	2006-12-15	Toy	0.66	1	1879
3093	CHO CHO	CSH	Chihuahua	CHO CHOCSH38936	2007-02-14	F	22248	2006-08-07	2006-12-13	Toy	0.66	1	1880
11737	PUFFIN	SHI	Shih-tzu	PUFFINSHI38936	2007-06-06	F	40015	2006-08-07	2006-12-15	Small	0.66	1	1881
9783	GIZMO	SHI	Shih-tzu	GIZMOSHI38936	2007-05-15	F	50450	2006-08-07	2006-12-13	Small	3.45	1	1882
21101	DUKE	GRT	Great Dane	DUKEGRT38936	2006-11-30	M	50604	2006-08-07	2006-11-13	giant	0.17	0	1883
1235	TOBY	MIS	Miniature Schnauzer	TOBYMIS38936	2007-01-18	M	53289	2006-08-07	2006-12-13	Small	3.45	1	1885
21730	FENIX D'EXCALIBUR	MIS	Miniature Schnauzer	FENIX D'EXCALIBURMIS38936	2006-12-07	F	67632	2006-08-07	2006-11-16	Small	2.76	1	1886
9680	POLUE	PIT	Pitbull Terrier	POLUEPIT38937	2007-05-12	F	11932	2006-08-08	2007-04-10	Medium	3.45	1	1887
12941	ROCKET	BOX	Boxer	ROCKETBOX38937	2007-06-26	F	44699	2006-08-08	2007-05-29	Large	0.87	1	1888
64	GRIFFIN	WHP	Whippet	GRIFFINWHP38937	2006-12-28	M	47150	2006-08-08	2006-12-07	Medium	0.22	0	1889
7235	CALI	MIX	Mix	CALIMIX38937	2007-04-12	F	50004	2006-08-08	2007-04-05	.	4.98	1	1890
3628	GUINNESS	PUG	Pug	GUINNESSPUG38938	2007-02-19	M	28483	2006-08-09	2007-01-28	Small	4.14	1	1891
9257	NUIJA	MIX	Mix	NUIJAMIX38938	2007-05-09	F	45221	2006-08-09	2007-02-15	.	0.38	0	1892
62	SPRING	BOR	Border Collie	SPRINGBOR38938	2006-12-05	F	50970	2006-08-09	2006-10-27	Medium	4.14	1	1894
9503	RASMUS	SPRINGER SPANIEL	Springer Spaniel	RASMUSSPRINGER SPANIEL38938	2007-05-14	M	51521	2006-08-09	2006-12-13	Medium	3.45	1	1895
22239	SHAGGUI	PUG	Pug	SHAGGUIPUG38939	2006-12-18	M	21405	2006-08-10	2006-10-12	Small	0.5	1	1896
6965	BENNY	BOS	Boston Terrier	BENNYBOS38939	2007-04-06	M	51917	2006-08-10	2006-12-02	Small	2.62	1	1897
9286	MAXIMUS	MIN	Miniature Pinscher	MAXIMUSMIN38939	2007-05-07	M	52832	2006-08-10	2007-04-18	Toy	2.76	1	1898
6656	BIJOU	CHI	Chihuahua	BIJOUCHI38940	2007-03-21	F	14822	2006-08-11	2006-12-02	Toy	2.62	1	1899
3201	CHARLIE	MIX	Mix	CHARLIEMIX38940	2007-02-16	F	15648	2006-08-11	2007-01-05	.	4.14	1	1900
10126	KEONA	MIX	Mix	KEONAMIX38940	2007-05-21	F	39944	2006-08-11	2007-04-30	.	4.14	1	1901
11745	ADDISON MIZNER	KCS	King Charles Spaniel	ADDISON MIZNERKCS38940	2007-06-11	M	50195	2006-08-11	2007-05-21	Toy	1.38	1	1902
10128	ROCK	BEA	Beagle	ROCKBEA38940	2007-05-21	M	52745	2006-08-11	2007-04-23	Small	4.14	1	1903
2909	SARAH	BEA	Beagle	SARAHBEA38940	2007-02-13	F	67245	2006-08-11	2007-01-08	Small	2.76	1	1904
7251	EMMETT	MIX	Mix	EMMETTMIX38940	2007-04-12	M	70101	2006-08-11	2007-01-31	.	1.51	1	1905
21909	BLACKIE	MIX	Mix	BLACKIEMIX38941	2006-12-15	M	35418	2006-08-12	2006-11-15	.	2.76	1	1906
5149	SASHA	POODLE	Poodle	SASHAPOODLE38941	2007-03-12	F	45533	2006-08-12	2006-10-14	.	2.17	1	1907
5011	COOKIE			COOKIE38941	2007-03-14	F	50856	2006-08-12	2007-03-07	.	3.45	1	1908
11514	JOSIE	PAP	Papillion	JOSIEPAP38941	2007-06-07	F	72637	2006-08-12	2006-10-01	Toy	1.15	1	1909
3900	SEMPER	POM	Pomeranian	SEMPERPOM38942	2007-02-27	M	12624	2006-08-13	2007-02-13	Toy	6.4	1	1910
36	EDDIE	BRT	Brittany Spaniel	EDDIEBRT38942	2006-12-27	M	18254	2006-08-13	2006-11-28	Medium	1.51	1	1912
14239	TIFFANY	CSH	Chihuahua	TIFFANYCSH38943	2007-07-17	F	25739	2006-08-14	2007-07-10	Toy	3.45	1	1913
9710	TURTLE	DSC	Dachshund	TURTLEDSC38944	2007-05-15	M	21520	2006-08-15	2007-01-01	Small	3.45	1	1914
9855	DALI	CSH	Chihuahua	DALICSH38944	2007-04-25	M	79368	2006-08-15	2007-02-21	Toy	3.45	1	1915
1212	MAX	GER	German Shepard	MAXGER38945	2007-01-16	M	3912	2006-08-16	2006-12-15	Large	3.45	1	1916
1737	SMOKEY	BRZ	Borzoi	SMOKEYBRZ38945	2007-01-25	F	12013	2006-08-16	2006-12-21	giant	1.75	1	1917
12261	LILA	RIDGEBACK	Rhodesian Ridgeback	LILARIDGEBACK38945	2007-06-15	F	78120	2006-08-16	2007-05-16	Large	3.45	1	1918
21724	WINNIE	ESS	Springer Spaniel	WINNIEESS38946	2006-12-13	F	27930	2006-08-17	2006-11-22	Medium	2.76	1	1919
2211	SOPHIA	DSM	Dachshund	SOPHIADSM38946	2007-02-03	F	50854	2006-08-17	2007-01-06	Small	4.14	1	1920
12673	SHINE	STA	Staffordshire Bull Terrier	SHINESTA38947	2007-06-22	F	21218	2006-08-18	2007-06-08	Medium	3.45	1	1921
3281	NONE	POM	Pomeranian	NONEPOM38947	2007-02-20	M	27210	2006-08-18	2007-01-10	Toy	4.14	1	1922
10374	LUNA	YRK	Yorkshire Terrier	LUNAYRK38947	2007-05-21	F	45438	2006-08-18	2007-03-12	Toy	1.75	1	1923
12708	APPY	GRT	Great Dane	APPYGRT38947	2007-06-12	F	50661	2006-08-18	2007-05-29	giant	3.45	1	1924
4265	AUDREY	PUG	Pug	AUDREYPUG38948	2007-03-05	F	27410	2006-08-19	2007-02-03	Small	0.07	0	1925
11797	COOKIE	MIX	Mix	COOKIEMIX38949	2007-06-11	M	45970	2006-08-20	2007-05-03	.	2.76	1	1926
9855	VINCHI	CSH	Chihuahua	VINCHICSH38949	2007-04-24	M	79348	2006-08-20	2007-02-16	Toy	3.45	1	1927
512	OCLAIRE	BER	Bernese Mountain Dog	OCLAIREBER38950	2007-01-05	F	1398	2006-08-21	2006-11-29	Large	4.98	1	1928
11446	MIA	YRK	Yorkshire Terrier	MIAYRK38950	2007-06-06	F	27431	2006-08-21	2007-05-01	Toy	4.98	1	1929
3167	BORIS	ESK	American Eskimo	BORISESK38950	2007-02-13	M	46555	2006-08-21	2007-01-06	Medium	2.62	1	1930
3891	KAI	POODLE	Poodle	KAIPOODLE38950	2007-02-27	M	50417	2006-08-21	2006-11-29	.	0.66	1	1931
3891	FOFA MAYA	POODLE	Poodle	FOFA MAYAPOODLE38950	2007-02-27	F	51133	2006-08-21	2006-11-29	.	3.46	1	1932
9803	SADIE	BEA	Beagle	SADIEBEA38950	2007-05-16	F	51292	2006-08-21	2006-12-16	Small	0.29	0	1933
22484	LADY	BOX	Boxer	LADYBOX38950	2006-12-21	F	69588	2006-08-21	2006-12-09	Large	0.29	0	1935
15782	DIEGO	EBD	English Bulldog	DIEGOEBD38951	2007-08-08	M	27362	2006-08-22	2007-07-25	Medium	4.14	1	1936
11334	LOKYS	YRK	Yorkshire Terrier	LOKYSYRK38951	2007-06-05	M	43896	2006-08-22	2006-12-28	Toy	0.1	0	1937
5190	KAMIKAZEE	MIX	Mix	KAMIKAZEEMIX38951	2007-03-13	F	49770	2006-08-22	2007-02-19	.	2.17	1	1938
10677	JOSEPHINA	YRK	Yorkshire Terrier	JOSEPHINAYRK38951	2007-05-29	F	51201	2006-08-22	2007-01-10	Toy	3.45	1	1939
2859	BOBBY	LAB	Labrador Retriever	BOBBYLAB38951	2007-02-12	M	69541	2006-08-22	2007-01-22	Large	4.14	1	1940
4602	BRACKEN	ECS	Cocker Spaniel	BRACKENECS38951	2007-03-06	M	70160	2006-08-22	2007-02-12	Small	4.14	1	1941
11623	LADY COCO	MIX	Mix	LADY COCOMIX38952	2007-06-11	F	52712	2006-08-23	2007-01-03	.	0.5	1	1942
665	MOCHA	WEL	Welsh Terrier	MOCHAWEL38953	2007-01-06	F	12584	2006-08-24	2006-12-16	Small	6.4	1	1943
13103	HECTOR	BUL	Bull Terrier	HECTORBUL38953	2007-06-27	M	14018	2006-08-24	2007-05-26	Large	2.17	1	1944
1231	PIPER	IRS	Irish Terrier	PIPERIRS38953	2007-01-15	F	23468	2006-08-24	2006-12-15	Small	3.45	1	1945
1147	CALIFORNIA JAZZ	LAB	Labrador Retriever	CALIFORNIA JAZZLAB38953	2007-01-17	M	49860	2006-08-24	2006-12-22	Large	4.14	1	1946
73	CHARLIE	STO	Standard Poodle	CHARLIESTO38953	2006-12-29	M	51392	2006-08-24	2006-12-02	Large	6.4	1	1947
11535	LUNA	DSM	Dachshund	LUNADSM38953	2007-06-08	F	51559	2006-08-24	2006-12-21	Small	2.76	1	1948
10109	ABIGAIL	SHI	Shih-tzu	ABIGAILSHI38953	2007-05-18	F	72078	2006-08-24	2006-11-22	Small	1.51	1	1949
22100	MAX	ABD	Bulldog	MAXABD38954	2006-12-18	M	10989	2006-08-25	2006-11-17	Large	3.45	1	1950
5989	HENRY	JRT	Jack Russell Terrier	HENRYJRT38954	2007-03-22	M	51051	2006-08-25	2007-02-22	Small	4.98	1	1951
3843	AMAIA	COC	Cocker Spaniel	AMAIACOC38954	2007-02-21	F	67746	2006-08-25	2007-01-18	Small	0.5	1	1952
3605	WIKET	PEK	Pekingese	WIKETPEK38955	2007-02-23	M	11951	2006-08-26	2007-01-09	Toy	4.14	1	1953
171	TEDDY	MIX	Mix	TEDDYMIX38955	2007-01-02	M	13365	2006-08-26	2006-12-01	.	6.4	1	1954
14684	DANIELLE	POM	Pomeranian	DANIELLEPOM38955	2007-07-20	F	13441	2006-08-26	2007-07-12	Toy	3.45	1	1955
13624	RILEY	BOS	Boston Terrier	RILEYBOS38955	2007-07-05	M	19582	2006-08-26	2006-12-18	Small	0.87	1	1956
11552	RAIDER	SIB	Siberian Husky	RAIDERSIB38955	2007-06-07	M	43253	2006-08-26	2007-05-18	Medium	2.76	1	1957
12845	CLARA	LAB	Labrador Retriever	CLARALAB38955	2007-06-27	F	50358	2006-08-26	2006-12-08	Large	3.46	1	1958
4451	TINKERBELL	MLT	Maltese	TINKERBELLMLT38955	2007-02-28	F	50720	2006-08-26	2007-02-07	Toy	3.45	1	1959
2277	MUFFET	SHI	Shih-tzu	MUFFETSHI38955	2007-02-02	M	66660	2006-08-26	2006-09-25	Small	1.15	1	1960
1437	PEPPER	MIX	Mix	PEPPERMIX38956	2007-01-23	M	12541	2006-08-27	2006-12-02	.	4.14	1	1961
157	CHELSEA	DOB	Doberman Pinscher	CHELSEADOB38956	2007-01-02	F	47173	2006-08-27	2006-12-01	Large	6.4	1	1962
22170	MADDIE	LAB	Labrador Retriever	MADDIELAB38957	2006-12-20	F	27601	2006-08-28	2006-11-23	Large	3.45	1	1963
16758	CARTMAN	LAB	Labrador Retriever	CARTMANLAB38957	2007-08-21	M	40483	2006-08-28	2006-12-11	Large	0.38	0	1964
13415	EDDIE	JRT	Jack Russell Terrier	EDDIEJRT38957	2007-07-02	M	48385	2006-08-28	2007-06-18	Small	1.75	1	1965
11414	CHOICE	POM	Pomeranian	CHOICEPOM38958	2007-06-01	F	28106	2006-08-29	2006-12-27	Toy	1.51	1	1966
22234	SAM	WES	West Highland Terrier	SAMWES38958	2006-12-20	M	48988	2006-08-29	2006-11-20	Small	3.45	1	1967
15710	SIMBA	CSH	Chihuahua	SIMBACSH38958	2007-08-07	M	53654	2006-08-29	2007-07-05	Toy	4.98	1	1968
9515	ALEX	HAV	Havanese	ALEXHAV38960	2007-05-14	M	49578	2006-08-31	2006-12-22	Toy	3.45	1	1969
15145	CHARLIE	SIB	Siberian Husky	CHARLIESIB38961	2007-07-31	M	13276	2006-09-01	2007-03-01	Medium	4.98	1	1970
14108	PENELOPE	JRT	Jack Russell Terrier	PENELOPEJRT38961	2007-07-12	F	16129	2006-09-01	2007-03-14	Small	0.5	1	1971
5524	NOIE			NOIE38961	2007-03-17	F	27883	2006-09-01	2007-02-14	.	0.87	1	1972
6750	TANNER	CDT	Coton de Tuleire	TANNERCDT38961	2007-04-03	M	47714	2006-09-01	2007-03-23	Small	3.45	1	1973
17129	ARCHIE	MPO	Miniature Poodle	ARCHIEMPO38961	2007-08-27	M	54309	2006-09-01	2007-08-06	Small	4.14	1	1974
13407	PETEY	JRT	Jack Russell Terrier	PETEYJRT38961	2007-07-03	M	55741	2006-09-01	2007-06-12	Small	2.17	1	1975
2459	BLUE	SBT	Staffordshire Bull Terrier	BLUESBT38961	2007-02-07	M	69430	2006-09-01	2007-01-06	Medium	4.14	1	1976
14398	CRASH	AMS	American Pitbull Terrier	CRASHAMS38962	2007-07-18	M	38750	2006-09-02	2006-11-03	Medium	4.98	1	1977
4428	GINGER	YRK	Yorkshire Terrier	GINGERYRK38962	2007-03-05	F	44725	2006-09-02	2006-12-27	Toy	3.45	1	1978
9355	NINA	PUG	Pug	NINAPUG38962	2007-05-08	F	67295	2006-09-02	2007-02-04	Small	0.87	1	1979
3050	PUP	BUL	Bull Terrier	PUPBUL38963	2007-02-16	F	49376	2006-09-03	2006-11-10	Large	0.29	0	1980
12683	ATHENA	AST	Staffordshire Bull Terrier	ATHENAAST38963	2007-06-21	F	52653	2006-09-03	2007-05-01	Medium	3.45	1	1981
9752	SUSIE	CSH	Chihuahua	SUSIECSH38963	2007-05-09	F	79260	2006-09-03	2007-01-02	Toy	0.87	1	1982
4328	DARBY	CRN	Cairn Terrier	DARBYCRN38965	2007-03-06	M	50580	2006-09-05	2007-02-06	Small	3.45	1	1983
3454	A6A	CSH	Chihuahua	A6ACSH38965	2007-02-21	M	50617	2006-09-05	2007-02-04	Toy	4.14	1	1984
12804	JINJER	MIX	Mix	JINJERMIX38965	2007-06-21	F	50947	2006-09-05	2007-05-16	.	4.98	1	1985
13012	BRANDY	CSH	Chihuahua	BRANDYCSH38965	2007-06-26	F	55298	2006-09-05	2007-02-23	Toy	2.17	1	1986
13012	KAMBRIE	CSH	Chihuahua	KAMBRIECSH38965	2007-06-26	F	56873	2006-09-05	2007-02-23	Toy	2.17	1	1987
6953	NANI	SOFT WHEATEN TERRIER	Wheaten Terrier	NANISOFT WHEATEN TERRIER38966	2007-04-10	F	52240	2006-09-06	2007-01-11	Medium	0.87	1	1988
1885	DIAMOND	MIX	Mix	DIAMONDMIX38966	2007-01-27	M	52290	2006-09-06	2006-12-21	.	2.17	1	1989
17365	LOLA	MLT	Maltese	LOLAMLT38966	2007-08-30	F	52316	2006-09-06	2007-04-27	Toy	1.51	1	1990
137	TUQUE	BOR	Border Collie	TUQUEBOR38966	2006-12-27	F	66092	2006-09-06	2006-11-29	Medium	6.4	1	1991
7753	WAFFLE	BOS	Boston Terrier	WAFFLEBOS38968	2007-04-19	F	26220	2006-09-08	2007-01-03	Small	2.76	1	1992
11321	ZUZU	LAB	Labrador Retriever	ZUZULAB38968	2007-06-05	F	52827	2006-09-08	2007-05-04	Large	2.17	1	1993
11321	BOZO	LAB	Labrador Retriever	BOZOLAB38968	2007-06-05	M	52956	2006-09-08	2007-05-04	Large	2.17	1	1994
3949	SCALA	ESK	American Eskimo	SCALAESK38969	2007-02-27	F	17910	2006-09-09	2007-01-25	Medium	1.15	1	1995
3475	ADDIE	PUG	Pug	ADDIEPUG38969	2007-02-21	F	50250	2006-09-09	2006-12-30	Small	2.62	1	1996
21101	ROMEO	SIB	Siberian Husky	ROMEOSIB38969	2006-11-30	M	50564	2006-09-09	2006-11-13	Medium	1.51	1	1997
12032	ANGEL	STS	Standard Schnauzer	ANGELSTS38969	2007-06-08	F	51178	2006-09-09	2007-05-18	Medium	4.98	1	1998
5959	SHERBERT	GRT	Great Dane	SHERBERTGRT38970	2007-03-19	F	27065	2006-09-10	2007-02-12	giant	4.98	1	1999
16065	BODHI	KCS	King Charles Spaniel	BODHIKCS38970	2007-08-13	M	48993	2006-09-10	2006-12-13	Toy	1.51	1	2000
7034	UTA	BRS	Brussels Griffon	UTABRS38970	2007-04-09	M	49281	2006-09-10	2007-03-01	Toy	2.76	1	2001
16019	CLEW	DAS	Dachshund	CLEWDAS38970	2007-08-10	M	50012	2006-09-10	2007-08-01	Small	2.17	1	2003
13012	COCO PUFFS	CSH	Chihuahua	COCO PUFFSCSH38970	2007-06-26	F	55473	2006-09-10	2007-02-23	Toy	2.17	1	2004
13012	DARLIN	CSH	Chihuahua	DARLINCSH38970	2007-06-26	F	56945	2006-09-10	2007-02-23	Toy	1.15	1	2005
7629	GIZMO	MIX	Mix	GIZMOMIX38970	2007-04-13	M	64642	2006-09-10	2006-12-07	.	0.66	1	2006
7629	CHARLIE	MIX	Mix	CHARLIEMIX38970	2007-04-13	M	64643	2006-09-10	2006-12-07	.	0.29	0	2007
13281	GORDON	JRT	Jack Russell Terrier	GORDONJRT38970	2007-06-29	M	66146	2006-09-10	2007-05-29	Small	4.14	1	2008
11599	MOMO	JRT	Jack Russell Terrier	MOMOJRT38970	2007-06-08	F	69606	2006-09-10	2007-03-30	Small	2.76	1	2009
15468	MAKAALA	MIX	Mix	MAKAALAMIX38971	2007-08-02	M	397	2006-09-11	2007-06-22	.	2.76	1	2010
7617	LOGAN	SPO	Standard Poodle	LOGANSPO38971	2007-04-18	M	16382	2006-09-11	2007-01-27	Large	0.66	1	2011
14116	AXEL	MAL	Alaskan Malamute	AXELMAL38971	2007-07-16	M	43231	2006-09-11	2007-05-30	Large	3.45	1	2012
14363	PICASSO	ESK	American Eskimo	PICASSOESK38971	2007-07-17	F	55272	2006-09-11	2007-05-01	Medium	0.22	0	2013
16273	CHER			CHER38971	2007-08-14	F	65517	2006-09-11	2007-02-23	.	0.87	1	2014
2539	MILO	COC	Cocker Spaniel	MILOCOC38972	2007-02-05	M	26713	2006-09-12	2007-01-12	Small	1.99	1	2015
11647	THUMBELINA	CHN	Japanese Chin	THUMBELINACHN38972	2007-06-11	F	27991	2006-09-12	2007-02-08	Toy	0.38	0	2016
2677	RAGS	MIX	Mix	RAGSMIX38972	2007-02-07	M	49546	2006-09-12	2007-01-05	.	4.14	1	2017
11425	OREO	SHI	Shih-tzu	OREOSHI38974	2007-06-05	M	28176	2006-09-14	2007-01-31	Small	4.98	1	2018
18140	SEMPER FI GUNNER	ROT	Rottweiler	SEMPER FI GUNNERROT38974	2007-09-13	M	40009	2006-09-14	2007-04-21	giant	1.75	1	2019
16759	BEN	COC	Cocker Spaniel	BENCOC38974	2007-08-21	M	46027	2006-09-14	2007-01-04	Small	1.99	1	2020
7968	TIGGER	YRK	Yorkshire Terrier	TIGGERYRK38974	2007-04-20	M	51634	2006-09-14	2007-01-19	Toy	0.05	0	2021
12254	BELLA	MLT	Maltese	BELLAMLT38974	2007-06-14	F	54464	2006-09-14	2006-12-11	Toy	0.87	1	2022
6954	NOAH	SHI	Shih-tzu	NOAHSHI38975	2007-04-07	M	11629	2006-09-15	2007-03-10	Small	4.98	1	2023
1993	IKAIKA	BOS	Boston Terrier	IKAIKABOS38975	2007-01-31	M	15128	2006-09-15	2007-01-10	Small	3.45	1	2024
14392	BRUTUS	YRK	Yorkshire Terrier	BRUTUSYRK38975	2007-07-18	M	18944	2006-09-15	2007-06-20	Toy	4.98	1	2025
9252	ROCCO	BRS	Brussels Griffon	ROCCOBRS38975	2007-05-09	M	28642	2006-09-15	2007-04-02	Toy	2.76	1	2026
6048	SASSY	EBD	English Bulldog	SASSYEBD38975	2007-03-09	F	47526	2006-09-15	2006-12-22	Medium	4.98	1	2027
699	PURPLE	BIC	Bichon Frise	PURPLEBIC38975	2007-01-09	F	51013	2006-09-15	2006-12-26	Small	6.4	1	2028
2071	SCRAPS	JRT	Jack Russell Terrier	SCRAPSJRT38975	2007-01-31	M	52426	2006-09-15	2006-12-13	Small	1.15	1	2029
1141	ANTININA	MIX	Mix	ANTININAMIX38975	2007-01-16	F	66521	2006-09-15	2006-12-05	.	0.5	1	2030
9919	GIORGIO	SPO	Standard Poodle	GIORGIOSPO38976	2007-05-16	M	3065	2006-09-16	2007-04-15	Large	3.45	1	2031
16509	TAHOE	MIX	Mix	TAHOEMIX38976	2007-08-21	M	15287	2006-09-16	2007-01-29	.	2.76	1	2032
4583	SHEILA	SBT	Staffordshire Bull Terrier	SHEILASBT38976	2007-03-07	F	50763	2006-09-16	2006-12-06	Medium	0.38	0	2033
10121	MAUI	GLD	Golden Retriever	MAUIGLD38976	2007-05-21	M	51807	2006-09-16	2007-04-30	Large	4.14	1	2035
7607	DAFFODIL	MIX	Mix	DAFFODILMIX38977	2007-04-16	F	11856	2006-09-17	2007-03-16	.	3.45	1	2036
4123	NOODLE			NOODLE38977	2007-03-01	F	50674	2006-09-17	2007-01-25	.	4.98	1	2037
13012	SHADOW	CLH	Chihuahua	SHADOWCLH38977	2007-06-26	M	56539	2006-09-17	2007-02-23	Toy	1.15	1	2038
1809	SHABELA			SHABELA38978	2007-01-30	F	13359	2006-09-18	2007-01-03	.	0.29	0	2039
1434		AMERICAN FOX HOUND	Fox Hound	AMERICAN FOX HOUND38978	2007-01-22	F	22192	2006-09-18	2006-12-18	Large	0.38	0	2040
9362	CHUTNEY	SPI	Shar-pei	CHUTNEYSPI38978	2007-05-09	F	22603	2006-09-18	2007-01-19	Medium	1.51	1	2041
14978	LOUIS	MAL	Alaskan Malamute	LOUISMAL38978	2007-07-27	M	50255	2006-09-18	2007-06-27	Large	3.45	1	2042
16275	CORDY	BOR	Border Collie	CORDYBOR38978	2007-08-15	F	64777	2006-09-18	2007-06-13	Medium	1.99	1	2043
2785	VITO	BOX	Boxer	VITOBOX38979	2007-02-09	M	51441	2006-09-19	2007-01-19	Large	4.14	1	2044
13017	HENRY	OES	Old English Sheepdog	HENRYOES38979	2007-06-28	M	53805	2006-09-19	2007-05-16	Large	2.17	1	2045
16811	LILLY	BOR	Border Collie	LILLYBOR38980	2007-08-24	F	53025	2006-09-20	2007-08-10	Medium	4.98	1	2046
12787	HAIL BRITANNIA	BDC	Bearded Collie	HAIL BRITANNIABDC38980	2007-06-26	M	66829	2006-09-20	2007-05-14	Large	1.51	1	2047
2995	LOUIS	BAS	Basset Hound	LOUISBAS38980	2007-02-13	M	69363	2006-09-20	2007-01-17	Small	2.76	1	2048
976	HANNAH	LEO	Leonberger	HANNAHLEO38981	2007-01-12	F	1399	2006-09-21	2006-12-13	giant	6.4	1	2049
6927	CLANCY	MIX	Mix	CLANCYMIX38981	2007-04-04	M	64714	2006-09-21	2007-01-06	.	0.66	1	2050
12810	KOA	BOS	Boston Terrier	KOABOS38981	2007-06-22	M	69596	2006-09-21	2007-06-22	Small	0.17	0	2051
15754	GOLDIE	GLD	Golden Retriever	GOLDIEGLD38981	2007-08-07	M	85964	2006-09-21	2007-03-06	Large	0.66	1	2053
10798	ABERDEEN'S STAR OF TEXAS	OTT	Otter Hound	ABERDEEN'S STAR OF TEXASOTT38982	2007-05-30	F	11386	2006-09-22	2007-03-24	Large	0.87	1	2054
4577	MIA	CSH	Chihuahua	MIACSH38982	2007-03-07	F	51837	2006-09-22	2006-12-16	Toy	4.14	1	2055
3788	LEYLA	WEL	Welsh Terrier	LEYLAWEL38982	2007-02-26	F	52709	2006-09-22	2007-02-05	Small	2.76	1	2056
2995	LOLA	BAS	Basset Hound	LOLABAS38982	2007-02-13	F	69361	2006-09-22	2007-01-17	Small	2.76	1	2057
2090	BUSTER	CDT	Coton de Tuleire	BUSTERCDT38983	2007-02-02	M	15226	2006-09-23	2007-01-24	Small	2.17	1	2058
15291	CHARLIE	LAB	Labrador Retriever	CHARLIELAB38983	2007-07-30	M	70446	2006-09-23	2007-06-18	Large	4.14	1	2059
1286	WIKI WIKI	SHI	Shih-tzu	WIKI WIKISHI38984	2007-01-16	M	13298	2006-09-24	2007-01-02	Small	3.45	1	2060
4808	SASHA	GER	German Shepard	SASHAGER38984	2007-03-07	F	50565	2006-09-24	2007-02-06	Large	0.29	0	2061
5858	LOUIE	PUG	Pug	LOUIEPUG38984	2007-03-23	M	53051	2006-09-24	2007-01-15	Small	3.45	1	2063
10786	TACO	POM	Pomeranian	TACOPOM38985	2007-05-22	M	1410	2006-09-25	2007-04-16	Toy	3.45	1	2064
18009	BILLY	DSC	Dachshund	BILLYDSC38985	2007-09-07	M	18759	2006-09-25	2007-08-15	Small	1.99	1	2065
[truncated: 6,012 more rows]
